# Supplementary material for: The zinc repository of Cupriavidus metallidurans
Source: Royal Society of Chemistry journal article supplement (doi:10.1039/c4mt00171k), 2014-09-24
Supplement: c4mt00171k1.pdf [file c4mt00171k1.pdf]

## The zinc repository of *Cupriavidus metallidurans*

### Electronic Supplementary Information

**Martin Herzberg<sup>1</sup>, Dirk Dobritzsch<sup>2</sup>, Stefan Helm<sup>2</sup>, Sacha Baginski<sup>2</sup>, and Dietrich H.  
Nies<sup>1\*</sup>**

<sup>1</sup>Molecular Microbiology, Institute for Biology/Microbiology, Martin-Luther-University  
Halle-Wittenberg.

<sup>2</sup>Plant Biochemistry, Institute for Biochemistry, Martin-Luther-University Halle-Wittenberg.

\*Correspondence to: Molecular Microbiology, Institute for Biology/Microbiology, Martin-  
Luther-University Halle-Wittenberg, Kurt-Mothes-Str. 3, 06120 Halle/Saale, Germany, EU.

Phone +49/0-345-5526352, Fax +49/0-345-5527010,

Email: [d.nies@mikrobiologie.uni-halle.de](mailto:d.nies@mikrobiologie.uni-halle.de)

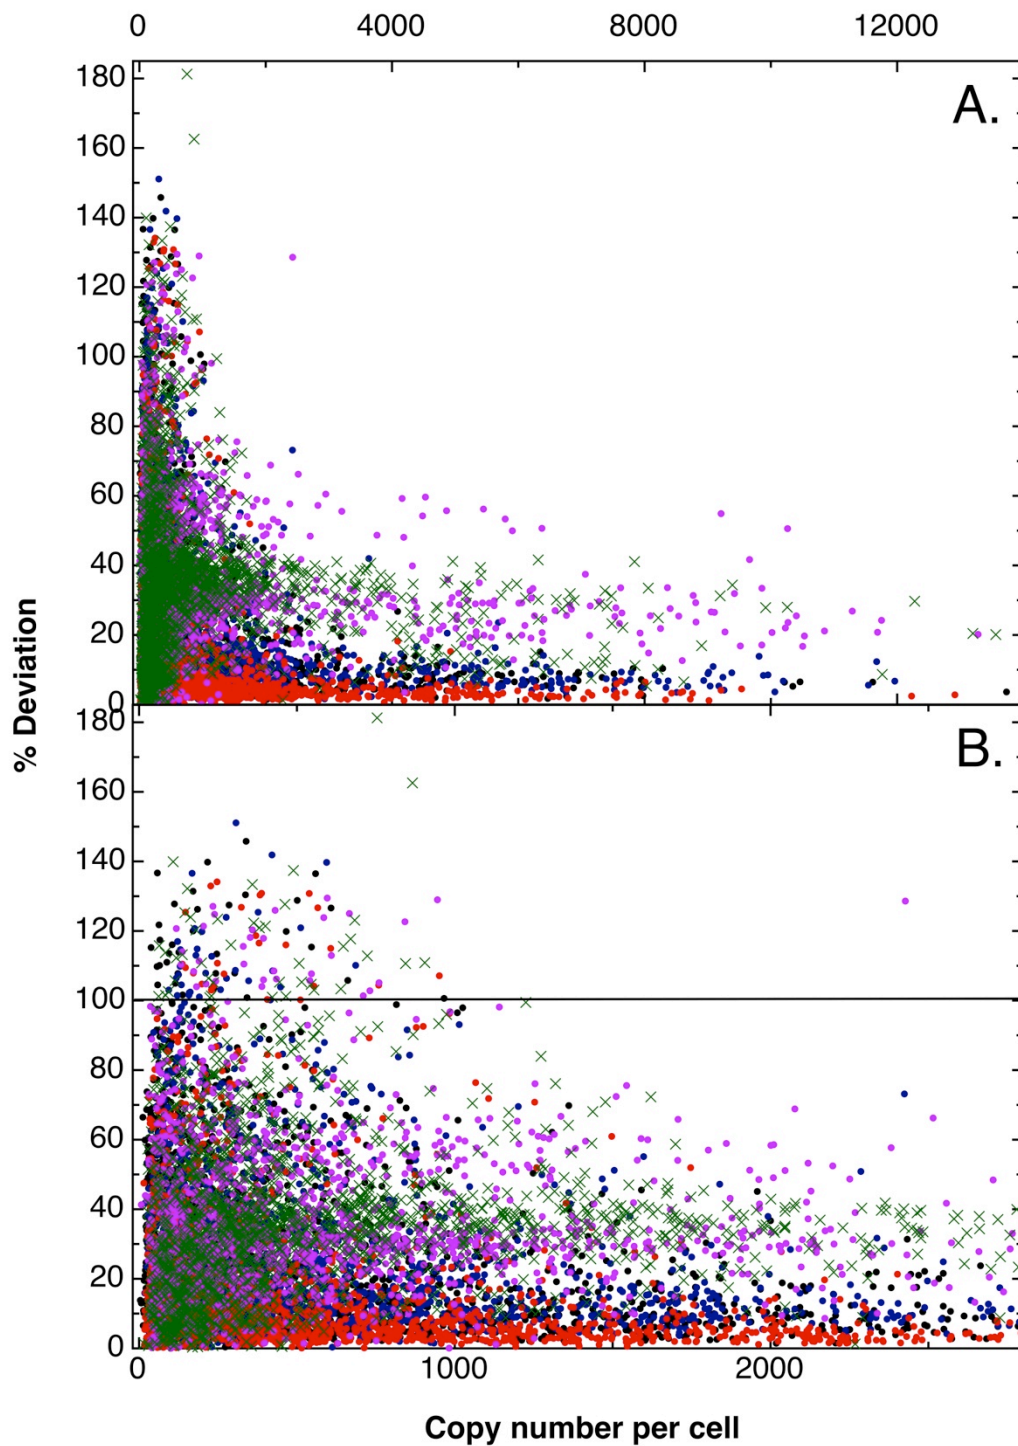

**Supplementary Figure S1. Deviation of the results.** The deviation of the number of individual proteins per cell was plotted against the number per cell obtained in a biological repeat with the differently colored symbols indicating the experiment. Run 1 not plotted. Panel B gives a 5-fold expansion of Panel A.

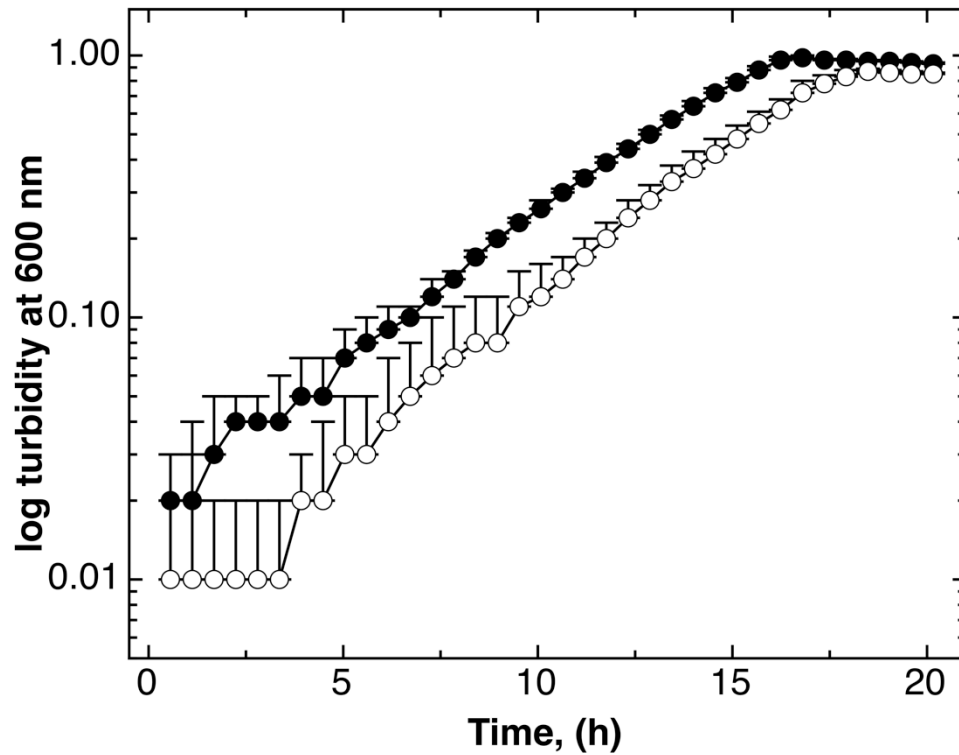

**Supplementary Figure S2. Growth rate of *C. metallidurans* strain AE104 and its  $\Delta zupT$  mutant.** The growth curve shows the increase in turbidity of a AE104 (filled circles) and a  $\Delta zupT$  (open circles) culture at 30°C in Tris-buffered mineral salts medium with sodium gluconate as the carbon source. At least three experiments, deviation bars shown only to the top due to the logarithmical scale.

```

ABF08170 1 MCVVCGC-----SDNSPTHARHVQQASGEPGVITVN 31
ABF08419 1 MCTICGCGAGETRIEGQELHTEHVHADGTVHAHAHPPHEQDHHYADHDHDHAHAHRAV 60
      CxxCGC motif

ABF08170 32 PANGDLHFGAGVARVSVPGMSQERAIKLETDILGANNRVAQQNRAHFELHGVTALNVVSS 91
ABF08419 61 RGTDHLHYGHGPAGAHAPGMSQARMVKIEQDILGKNNAYAAQNRWFDEHGVFALNFVSS 120

ABF08170 92 PGSGKTTLLCATIEALKARQPGLHVAVIEGDQQTSFDADRIRATGAPAIQVNTGKGCHLD 151
ABF08419 121 PGSGKTTLLVRTIEAL---QSTCGLAVIEGDQQTSFDAERIRATGVRALQINTGKGCHLD 177
      GxGKTT (Walker A motif)

ABF08170 152 APMVAEAFAKLHTEHADGHSHDHVDRHGHHHGHGHGHEHDHHHHGDAHSLLFIENVGN 211
ABF08419 178 AYMVGHALEQLRPQD-----ESVLLIENVGN 203
      (Walker B motif) ExxG

ABF08170 212 LVCPAMWDLGEAAKVAILSSVTEGEDKPLKYPDMFAASQLMILNKDLLPHVKFDVARCIA 271
ABF08419 204 LVCPSAFDLGEAHKVVILSVTEGEDKPLKYPDMFRAASLMLLNKCDLLPHLSFDVERTIE 263
      (Base recognition motif) NKxD

ABF08170 272 LARRVNPAIEVIQLSATTGEGMDAWLHWDHAMSTHHHHHDETVSEEAALRERVKQLEAE 331
ABF08419 264 YARRVNPALHVIRTSSTTGEGFAEWLAWITEGLVQRAKRSQNVD---LLRARVAELEAE 320

ABF08170 332 LARAKAVLSAKTPI 345
ABF08419 321 LAVLKR----- 326

```

**Supplementary Figure S3. Alignment of the two HypB GTPases and nickel chaperones required for synthesis of the membrane-bound hydrogenase (AB08170, HypB1 Rmet\_1285) and the soluble NAD-reducing hydrogenase (AB08419, HypB2, Rmet\_1536). Alignment performed with Geneious (www.geneious.com), histidine- and cysteine-rich regions underlined, and conserved motifs indicated.**

**Supplementary Table S1.** Number of identified proteins in the SYNAPT experiment. Three biological repeats were performed to identify and quantify the proteins in the supernatant or solubilized sediment of ultracentrifuged crude extract from mid-exponential cells of *C. metallidurans* AE104, its  $\Delta zupT$  mutant, and in one experiment only the plasmid-containing *C. metallidurans* wild type strain CH34(pMOL28, pMOL30). The data base contained 5804 proteins. Of these, 3469 proteins (60%) were identified in at least one experiment, the other 2335 proteins were not further evaluated.

| Run | Strain        | Fraction | Not found <sup>a</sup> | Not quantified <sup>b</sup> | One value <sup>c</sup> | Large deviation <sup>d</sup> | Lower deviation <sup>e</sup> |
|-----|---------------|----------|------------------------|-----------------------------|------------------------|------------------------------|------------------------------|
| 1   | AE104         | Supern.  | 2807                   | 8                           | 210                    | 312                          | 132                          |
| 1   | AE104         | Membr.   | 2769                   | 4                           | 650                    | 26                           | 20                           |
| 1   | $\Delta zupT$ | Supern.  | 2776                   | 3                           | 639                    | 26                           | 25                           |
| 1   | $\Delta zupT$ | Membr.   | 2618                   | 5                           | 281                    | 54                           | 511                          |
| 2   | AE104         | Supern.  | 1366                   | 23                          | 360                    | 154                          | 1566                         |
| 2   | AE104         | Membr.   | 1167                   | 43                          | 412                    | 361                          | 1486                         |
| 2   | $\Delta zupT$ | Supern.  | 1570                   | 29                          | 292                    | 112                          | 1466                         |
| 2   | $\Delta zupT$ | Membr.   | 1772                   | 29                          | 342                    | 129                          | 1197                         |
| 3   | AE104         | Supern.  | 1425                   | 17                          | 380                    | 197                          | 1450                         |
| 3   | AE104         | Membr.   | 1840                   | 26                          | 302                    | 192                          | 1109                         |
| 3   | $\Delta zupT$ | Supern.  | 1711                   | 28                          | 337                    | 503                          | 890                          |
| 3   | $\Delta zupT$ | Membr.   | 1861                   | 22                          | 409                    | 325                          | 852                          |
| 3   | CH34          | Supern.  | 1474                   | 25                          | 331                    | 202                          | 1437                         |
| 3   | CH34          | Membr.   | 1316                   | 28                          | 441                    | 929                          | 755                          |

<sup>a</sup>Not found in at least three technical repeats of this biological experiment. <sup>b</sup>At least one specific tryptic peptide of this protein has been identified but the SYNAPT algorithm quantifies the protein only if at least three peptides were unambiguously found. <sup>c</sup>A protein could be quantified in one of the technical repeats but not in the other technical repeats. <sup>d</sup>The deviation of the calculated fmol quantities of the protein from the technical repeats was above 50%, or <sup>e</sup>below this value, usually in the range between 10% and 20%. Supern., supernatant of the ultracentrifugation step; Membr., solubilized sediment.

**Supplementary Table S2.** Number of proteins in the parent strain AE104 and the  $\Delta zupT$  mutant sorted into the KEGG orthology system<sup>a</sup>

| AE104                 | $\Delta zupT$         | KEGG Orthology Description                                         |
|-----------------------|-----------------------|--------------------------------------------------------------------|
| <b>612,625±72,441</b> | <b>662,067±93,313</b> | <b>Metabolism</b>                                                  |
| <u>200,869±23,125</u> | <u>241,419±34,575</u> | <u>Carbohydrate Metabolism</u>                                     |
| 68,733±4,997          | 72,589±5,924          | Citrate cycle (TCA cycle) {PATH:ko00020}                           |
| 36,266±4,969          | 42,806±5,546          | Glycolysis / Gluconeogenesis {PATH:ko00010}                        |
| 30,210±4,314          | 34,284±5,509          | Pyruvate metabolism {PATH:ko00620}                                 |
| 23,434±2,468          | 25,812±4,313          | Butanoate metabolism {PATH:ko00650}                                |
| 12,398±2,083          | 14,953±3,091          | Pentose phosphate pathway {PATH:ko00030}                           |
| 10,092±1,406          | 11,209±2,407          | Propanoate metabolism {PATH:ko00640}                               |
| 6,005±1,300           | <b>24,129±5,929</b>   | Glyoxylate and dicarboxylate metabolism {PATH:ko00630}             |
| 4,747±302             | 4,957±515             | Nucleotide sugars metabolism {PATH:ko00520}                        |
| 4,529±455             | 5,144±601             | Aminosugars metabolism {PATH:ko00530}                              |
| 2,504±391             | 3,059±462             | Pentose and glucuronate interconversions {PATH:ko00040}            |
| 688±23                | 704±153               | Inositol phosphate metabolism {PATH:ko00562}                       |
| 400±76                | 594±5                 | Galactose metabolism {PATH:ko00052}                                |
| 400±174               | 531±55                | Starch and sucrose metabolism {PATH:ko00500}                       |
| 362±149               | 490±64                | Ascorbate and aldarate metabolism {PATH:ko00053}                   |
| 101±20                | <b>158±0</b>          | Fructose and mannose metabolism {PATH:ko00051}                     |
| <u>94,065±11,188</u>  | <u>86,568±10,497</u>  | <u>Energy Metabolism</u>                                           |
| 56,941±6,825          | 42,808±5,914          | Oxidative phosphorylation {PATH:ko00190}                           |
| 22,209±2,408          | 26,567±2,863          | Nitrogen metabolism {PATH:ko00910}                                 |
| 8,565±873             | 10,513±1,156          | Methane metabolism {PATH:ko00680}                                  |
| 5,727±763             | 5,585±541             | Sulfur metabolism {PATH:ko00920}                                   |
| 554±300               | 516±0                 | ATPases                                                            |
| 68±19                 | 47±0                  | Pyruvate/Oxoglutarate oxidoreductases                              |
| 0±0                   | <b>531±23</b>         | Carbon fixation {PATH:ko00710}                                     |
| <u>34,683±4,743</u>   | <u>33,887±7,043</u>   | <u>Lipid Metabolism</u>                                            |
| 21,258±2,793          | 21,710±4,688          | Fatty acid biosynthesis {PATH:ko00061}                             |
| 5,329±962             | 5,039±1,319           | Biosynthesis of steroids {PATH:ko00100}                            |
| 3,472±127             | 4,021±297             | Fatty acid metabolism {PATH:ko00071}                               |
| 2,536±378             | 1,921±504             | Arachidonic acid metabolism {PATH:ko00590}                         |
| 1,293±164             | <b>756±98</b>         | Glycerophospholipid metabolism {PATH:ko00564}                      |
| 543±249               | <b>351±127</b>        | Androgen and estrogen metabolism {PATH:ko00150}                    |
| 252±68                | <b>88±9</b>           | Glycerolipid metabolism {PATH:ko00561}                             |
| <u>61,782±6,450</u>   | <u>67,541±8,705</u>   | <u>Nucleotide Metabolism</u>                                       |
| 44,287±4,777          | 48,445±6,359          | Purine metabolism {PATH:ko00230}                                   |
| 17,495±1,673          | 19,096±2,346          | Pyrimidine metabolism {PATH:ko00240}                               |
| <u>151,834±15,392</u> | <u>164,823±20,872</u> | <u>Amino Acid Metabolism</u>                                       |
| 31,496±2,253          | 28,867±2,888          | Methionine metabolism {PATH:ko00271}                               |
| 25,163±2,342          | 27,051±3,671          | Glycine, serine and threonine metabolism {PATH:ko00260}            |
| 17,669±1,746          | 20,003±2,580          | Valine, leucine and isoleucine biosynthesis {PATH:ko00290}         |
| 14,857±2,196          | 16,954±2,557          | Phenylalanine, tyrosine and tryptophan biosynthesis {PATH:ko00400} |
| 11,334±997            | 13,804±1,801          | Lysine biosynthesis {PATH:ko00300}                                 |

|                     |                     |                                                            |
|---------------------|---------------------|------------------------------------------------------------|
| 9,985±1,574         | 11,470±2,339        | Histidine metabolism {PATH:ko00340}                        |
| 9,669±854           | 10,079±1,210        | Alanine and aspartate metabolism {PATH:ko00252}            |
|                     |                     | Urea cycle and metabolism of amino groups                  |
| 8,739±956           | 10,169±1,127        | {PATH:ko00220}                                             |
| 6,544±526           | 7,221±393           | Glutamate metabolism {PATH:ko00251}                        |
| 5,883±526           | 6,190±380           | Tyrosine metabolism {PATH:ko00350}                         |
| 4,049±649           | 4,854±593           | Arginine and proline metabolism {PATH:ko00330}             |
| 2,719±352           | 3,574±775           | Valine, leucine and isoleucine degradation {PATH:ko00280}  |
| 1,300±44            | 1,708±162           | Cysteine metabolism {PATH:ko00272}                         |
| 1,057±212           | 1,010±181           | Phenylalanine metabolism {PATH:ko00360}                    |
| 961±29              | 1,277±84            | Tryptophan metabolism {PATH:ko00380}                       |
| 409±138             | 591±131             | Lysine degradation {PATH:ko00310}                          |
| <u>9,885±1,592</u>  | <u>10,807±2,028</u> | <u>Metabolism of Other Amino Acids</u>                     |
| 5,299±695           | 5,645±853           | Glutathione metabolism {PATH:ko00480}                      |
| 1,696±128           | 1,876±441           | Aminophosphonate metabolism {PATH:ko00440}                 |
| 1,471±548           | 1,467±488           | D-Glutamine and D-glutamate metabolism {PATH:ko00471}      |
| 628±30              | 894±60              | D-Alanine metabolism {PATH:ko00473}                        |
| 605±187             | 783±141             | beta-Alanine metabolism {PATH:ko00410}                     |
| 131±2               | <b>69±39</b>        | Taurine and hypotaurine metabolism {PATH:ko00430}          |
| 55±1                | 73±6                | Selenoamino acid metabolism {PATH:ko00450}                 |
| <u>8,279±1,844</u>  | <u>6,242±1,006</u>  | <u>Glycan Biosynthesis and Metabolism</u>                  |
| 7,465±1,652         | 5,811±0,960         | Lipopolysaccharide biosynthesis {PATH:ko00540}             |
| 814±191             | <b>431±46</b>       | Peptidoglycan biosynthesis {PATH:ko00550}                  |
| <u>41,595±6,539</u> | <u>41,738±7,571</u> | <u>Metabolism of Cofactors and Vitamins</u>                |
| 9,311±1,779         | 9,149±2,026         | Biotin metabolism {PATH:ko00780}                           |
| 7,232±1,262         | 7,416±1,312         | Porphyrin and chlorophyll metabolism {PATH:ko00860}        |
| 4,976±964           | 4,521±1,302         | Folate biosynthesis {PATH:ko00790}                         |
| 4,615±443           | 5,495±738           | Riboflavin metabolism {PATH:ko00740}                       |
| 4,384±630           | 3,510±358           | Nicotinate and nicotinamide metabolism {PATH:ko00760}      |
| 4,118±506           | 4,579±710           | Pantothenate and CoA biosynthesis {PATH:ko00770}           |
| 2,822±241           | 3,344±248           | Thiamine metabolism {PATH:ko00730}                         |
| 2,413±407           | 2,146±483           | Ubiquinone biosynthesis {PATH:ko00130}                     |
| 1,725±309           | 1,579±393           | Vitamin B6 metabolism {PATH:ko00750}                       |
| <u>2,855±599</u>    | <u>2,548±428</u>    | <u>Biosynthesis of Secondary Metabolites</u>               |
| 2,031±445           | 1,638±139           | Penicillins and cephalosporins biosynthesis {PATH:ko00311} |
| 622±109             | 443±16              | Flavonoid biosynthesis {PATH:ko00941}                      |
| 203±045             | <b>467±274</b>      | Terpenoid biosynthesis {PATH:ko00900}                      |
| <u>6,778±970</u>    | <u>6,493±587</u>    | <u>Xenobiotics Biodegradation and Metabolism</u>           |
| 4,328±574           | 3,913±300           | gamma-Hexachlorocyclohexane degradation                    |
| 859±167             | 1,260±190           | {PATH:ko00361}                                             |
| 725±98              | <b>268±033</b>      | Benzoate degradation via hydroxylation {PATH:ko00362}      |
| 425±99              | 477±42              | Toluene and xylene degradation {PATH:ko00622}              |
| 278±32              | 230±23              | Caprolactam degradation {PATH:ko00930}                     |
| 122±0               | <b>201±0</b>        | 2,4-Dichlorobenzoate degradation {PATH:ko00623}            |
| 42±0                | <b>145±0</b>        | Benzoate degradation via CoA ligation {PATH:ko00632}       |
|                     |                     | Carbazole degradation {PATH:ko00629}                       |

|                        |                        |                                                      |
|------------------------|------------------------|------------------------------------------------------|
| <b>536,214±72,575</b>  | <b>577,255±73,912</b>  | <b>Genetic Information Processing</b>                |
| <u>31,993±2,625</u>    | <u>35,432±6,312</u>    | <u>Transcription</u>                                 |
| 20,644±1,668           | 23,181±5,295           | RNA polymerase {PATH:ko03020}                        |
| 11,349±957             | 12,251±1,017           | Other transcription related proteins                 |
| <u>331,138±45,010</u>  | <u>360,607±44,054</u>  | <u>Translation</u>                                   |
| 306,099±41,078         | 333,597±38,425         | Other translation proteins                           |
| 23,961±3,815           | 25,696±5,446           | Other translation proteins                           |
| 1,078±117              | 1,314±183              | Aminoacyl-tRNA biosynthesis {PATH:ko00970}           |
| <u>130,497±19,153</u>  | <u>134,839±16,789</u>  | <u>Folding, Sorting and Degradation</u>              |
| 102,051±13,660         | 117,933±13,506         | Protein folding and associated processing            |
| 14,593±2,589           | 10,452±1,991           | Protein export {PATH:ko03060}                        |
| 13,455±2,890           | <b>5,789±1,149</b>     | Type II secretion system {PATH:ko03090}              |
| 398±14                 | <b>665±143</b>         | Type IV secretion system {PATH:ko03080}              |
| <u>42,586±5,786</u>    | <u>46,377±6,757</u>    | <u>Replication and Repair</u>                        |
| 31,713±4,623           | 37,071±5,528           | Other replication, recombination and repair proteins |
| 5,908±777              | 5,761±796              | Replication complex                                  |
| 4,965±386              | 3,545±432              | DNA polymerase {PATH:ko03030}                        |
| <b>95,811±17,990</b>   | <b>67,397±13,440</b>   | <b>Environmental Information Processing</b>          |
| <u>84,682±13,886</u>   | <u>61,389±12,200</u>   | <u>Membrane Transport</u>                            |
| 66,640±10,709          | 51,326±9,900           | ABC transporters {PATH:ko02010}                      |
| 7,114±1,329            | <b>3,679±799</b>       | Pores ion channels                                   |
| 7,091±1,080            | <b>3,172±859</b>       | Other ion-coupled transporters                       |
| 2,153±404              | <b>1,391±384</b>       | Other transporters                                   |
| 1,601±364              | 1,822±258              | Phosphotransferase system (PTS) {PATH:ko02060}       |
| 84±0                   | 0±0                    | Electron transfer carriers                           |
| <u>11,129±4,104</u>    | <u>6,008±1,240</u>     | <u>Signal Transduction</u>                           |
| 11,129±4,104           | <b>6,008±1,240</b>     | Two-component system {PATH:ko02020}                  |
| <b>15,906±1,791</b>    | <b>11,866±1,776</b>    | <b>Cellular Processes</b>                            |
| <u>3,104±610</u>       | <b>1,354±427</b>       | <u>Cell Motility</u>                                 |
| 1,734±431              | <b>1,115±427</b>       | Bacterial chemotaxis {PATH:ko02030}                  |
| 1,370±179              | <b>239±0</b>           | Flagellar assembly {PATH:ko02040}                    |
| <u>12,718±1,150</u>    | <u>10,512±1,348</u>    | <u>Cell Growth and Death</u>                         |
| 12,718±1,150           | 10,512±1,348           | Cell division                                        |
| <u>83±31</u>           | <b>0±0</b>             | <u>Endocrine System</u>                              |
| 83±31                  | <b>0±0</b>             | PPAR signaling pathway {PATH:ko03320}                |
| <b>164±0,043</b>       | <b>98±12</b>           | <b>Human Diseases</b>                                |
| 164±0,043              | <b>98±12</b>           | <u>Neurodegenerative Disorders</u>                   |
| 164±0,043              | <b>98±12</b>           | Amyotrophic lateral sclerosis (ALS) {PATH:ko05030}   |
| <b>659,445±109,092</b> | <b>617,497±120,010</b> | <b>Not in KEGG orthology</b>                         |

<sup>a</sup>The number of proteins in each KEGG orthology group <sup>1</sup> is indicated. Level 2 groups are underlined and contain the sum of the numbers in each of its level 3 groups, the level 1 groups



(bold) respectively those of their level 2 groups. Red letter indicate a decreased number in the mutant, green letters an increased number. Number in italics indicate no significance.

**Supplementary Table S3. The cluster of genes for autotrophic metabolism and its gene products**

| Name             | WT, cell <sup>-1</sup> | Mut, cell <sup>-1</sup> | Description                                                   |
|------------------|------------------------|-------------------------|---------------------------------------------------------------|
| Rmet_1497        | NF                     | 144±10                  | Q1LN96 Putative uncharacterized protein                       |
| Rmet_1498, CbbO  | NF                     | 169±38                  | Q1LN95 Rubisco activation protein                             |
| Rmet_1499, CbbQ  | NF                     | 433±315                 | Q1LN94 ATPase associated with Rubisco activation              |
| Rmet_1500, CbbS  | NF                     | 1689±1619               | Q1LN93 Ribulose biphosphate carboxylase small chain           |
| Rmet_1501, CbbL  | 70                     | 6269±139                | Q1LN92 Ribulose biphosphate carboxylase large chain           |
| Rmet_1502, CbbR2 | <b>NF</b>              | 290                     | Q1LN91 Transcriptional regulator, LysR family                 |
| Rmet_1503, TnpA  | NFF                    | NQ                      | Q9RBF5 Insertion sequence IS1090                              |
| Rmet_1504        |                        |                         | Q1LN89 Putative uncharacterized protein                       |
| Rmet_1505        |                        |                         | Q1LN88 ISSod11, transposase                                   |
| Rmet_1506, TnpA  | NQ                     | NF                      | Q6SKD6 Transposase                                            |
| Rmet_1507, CbbF1 | NeF                    | NeF                     | Q1LN86 D-fructose 1,6-bisphosphatase                          |
| Rmet_1508, CbbR2 | NF                     | 47                      | Q1LN85 Transcriptional regulator, LysR family                 |
| Rmet_1510, CbbE1 | NF                     | 32                      | Q1LN83 Ribulose-5-phosphate 3-epimerase                       |
| Rmet_1511, CbbF2 | <b>NF</b>              | 237±200                 | Q1LN82 D-fructose 1,6-bisphosphatase                          |
| Rmet_1512, CbbT  | NF                     | 531±23                  | Q1LN81 Phosphoribulokinase                                    |
| Rmet_1513, CbbT1 | NF                     | 327±151                 | Q1LN80 Transketolase                                          |
| Rmet_1514, CbbZ1 | 163                    | 120±24                  | Q1LN79 Phosphoglycolate phosphatase                           |
| Rmet_1515, CbbG1 | 62±16                  | 573±497                 | Q1LN78 Glyceraldehyde-3-phosphate dehydrogenase               |
| Rmet_1516, Pgl1  | 277±190                | 151±28                  | Q1LN77 Phosphoglycerat-Kinase                                 |
| Rmet_1517, CbbY  | NF                     | 61                      | Q1LN76 HAD-superfamily hydrolase subfamily IA, variant 3      |
| Rmet_1518, CbbA2 | 68±33                  | 191±130                 | Q1LN75 Fructose-bisphosphate aldolase                         |
| Rmet_1519, PykA2 | NeF                    | NeF                     | Q1LN74 Pyruvate kinase                                        |
| Rmet_1520, CbbJ1 | NF                     | 101±13                  | Q1LN73 Triosephosphate isomerase                              |
| Rmet_1521, CbbI1 | NF                     | 76±14                   | Q1LN72 Ribose-5-phosphate isomerase                           |
| Rmet_1522, HoxF  | NF                     | 1694±1662               | Q1LN71 NAD-reducing hydrogenase large subunit, 51 kDa subunit |
| Rmet_1523, HoxU  | <b>NF</b>              | 1098±989                | Q1LN70 NAD-reducing hydrogenase small subunit                 |
| Rmet_1524, HoxY  | <b>NF</b>              | 1855±67                 | Q1LN69 NAD-reducing hydrogenase hoxS, 20 kDa delta subunit    |
| Rmet_1525, HoxH  | 34                     | 4611±84                 | Q1LN68 Nickel-dependent hydrogenase, large subunit            |

|                    |               |                 |                                                                                            |
|--------------------|---------------|-----------------|--------------------------------------------------------------------------------------------|
| Rmet_1526, HoxW    | NF            | <b>1766±37</b>  | Q1LN67 HoxW, highly specific carboxyl-terminal protease involved in hydrogenase maturation |
| Rmet_1527, HoxI    | NF            | <b>8605±319</b> | Q1LN66 Cyclic nucleotide-binding domain (CNMP-BD) protein                                  |
| Rmet_1528, PntAA'  |               |                 | Q1LN65 Alanine dehydrogenase/PNT-like protein, interrupted                                 |
| Rmet_1529          | NF            | <b>373±49</b>   | Q1LB62 Integrase, catalytic region                                                         |
| Rmet_1530, PntAA'' |               |                 | Q1LN63 Alanine dehydrogenase/PNT-like protein, interrupted                                 |
| Rmet_1531, PntAB   |               |                 | Q1LN62 Pyridine nucleotide transhydrogenase subunit alpha, truncated                       |
| Rmet_1532, PntB    | NeF           | NeF             | Q1LN61 NAD(P) transhydrogenase, beta subunit                                               |
| Rmet_1533, HoxN    | NeF           | NeF             | Q1LN60 High-affinity nickel-transporter                                                    |
| Rmet_1534, HoxV    |               |                 | Q1LN59 Putative uncharacterized protein                                                    |
| Rmet_1535, HypA2   | NF            | <b>622±77</b>   | Q1LN58 Hydrogenase nickel insertion protein HypA                                           |
| Rmet_1536, HypB2   | NF            | <b>5295±249</b> | Q1LN57 Hydrogenase accessory protein HypB                                                  |
| Rmet_1537, HypF2   | NF            | <b>504±33</b>   | Q1LN56 (NiFe) hydrogenase maturation protein HypF, carbamoyl phosphate phosphatase         |
| Rmet_1538, HypC2   | NeF           | NeF             | Q1LN55 Hydrogenase assembly chaperone hypC/hupF                                            |
| Rmet_1539, HypD2   | NF            | <b>493±29</b>   | Q1LN54 Hydrogenase expression/formation protein HypD                                       |
| Rmet_1540, HypE2   | NF            | <b>2965±149</b> | Q1LN53 Hydrogenase expression/formation protein HypE                                       |
| Rmet_1541, HoxX    | NF            | <b>371±61</b>   | Q1LN52 Formyl transferase-like protein                                                     |
| Rmet_1542, HoxA    | <b>608±41</b> | <b>240</b>      | Q1LN51 hydrogenase transcriptional regulatory protein                                      |

<sup>a</sup>The protein numbers were taken from Supplementary Data Base. Colored numbers or letter for strain AE104 show difference in number compared to CH34 wild type, for the  $\Delta zupT$  strain for the comparison  $\Delta zupT$ /AE104. Red indicates down- and green up-regulation. Numbers in italics show a non significant difference. Descriptions on a green field show that the corresponding genes are transcribed in the forward orientation, yellow reverse. Two insertion elements are boxed. “NF”, not found; “NeF”, never found in any strain.

**Supplementary Table S4. The predicted zinc and cobalt proteome of the strain AE104 and  $\Delta zupT^a$** 

| Name                                    | WT, cell <sup>-1</sup> | Mut, cell <sup>-1</sup> | Description                                                    |
|-----------------------------------------|------------------------|-------------------------|----------------------------------------------------------------|
| <b>Predicted zinc-binding proteins:</b> |                        |                         |                                                                |
| <b>TOTAL</b>                            | <b>109,839±10,662</b>  | <b>122,837±13,608</b>   |                                                                |
| <b>Environ.</b>                         |                        |                         |                                                                |
| <b>Inform.</b>                          |                        |                         |                                                                |
| <b>Proces. (0.05%)</b>                  | <b>60±32</b>           | <b>1018</b>             |                                                                |
| <b>Membrane Transport</b>               | <b>60±32</b>           | <b>1018</b>             |                                                                |
| <b>ABC transporters</b>                 | <b>60±32</b>           | <b>1018</b>             |                                                                |
| Rmet_1412                               | 60±32                  | 1018                    | Q1LNI1 D-aminopeptidase DppA. Metallo peptidase.               |
| <b>Pores ion channels</b>               | <b>0</b>               | <b>0</b>                | MEROPS family M55                                              |
| Rmet_2621, ZupT                         | NeF                    | NeF                     | Q1LK28 Zinc/iron permease                                      |
| <b>Genetic Information</b>              |                        |                         |                                                                |
| <b>Processing (50.4%)</b>               | <b>55,305±4510</b>     | <b>61,220±6109</b>      |                                                                |
| <b>Folding. Sorting and</b>             |                        |                         |                                                                |
| <b>Degradation</b>                      | <b>3254±319</b>        | <b>4447±225</b>         |                                                                |
| <b>Protein folding and</b>              |                        |                         |                                                                |
| <b>associated processing</b>            | <b>3254±319</b>        | <b>4447±225</b>         |                                                                |
| Rmet_2922                               | 3040±256               | 3720±115                | O33522 Chaperone protein DnaK                                  |
| Rmet_3563                               | 143±33                 | 105±33                  | Q1LHE1 HtpX-2 peptidase. Metallo peptidase. MEROPS family M48B |
| Rmet_3464                               | 70±30                  | NF                      | Q1LHP0 HtpX peptidase. Metallo peptidase. MEROPS family M48B   |
| Rmet_1286                               | NF                     | NF                      | Q1LNV5 Hydrogenase nickel insertion protein HypA               |
| Rmet_1535                               | NF                     | 622±77                  | Q1LN58 Hydrogenase nickel insertion protein HypA               |
| <b>Replication and Repair</b>           | <b>2358±325</b>        | <b>2188±267</b>         |                                                                |
| <b>Replication. recomb..</b>            |                        |                         |                                                                |
| <b>repair</b>                           | <b>741±152</b>         | <b>442±282</b>          |                                                                |
| Rmet_4549                               | 545±111                | 376±282                 | Q1LEL2 UvrA family protein                                     |

|                                   |                    |                    |                                                                   |
|-----------------------------------|--------------------|--------------------|-------------------------------------------------------------------|
| Rmet_3328                         | <b>196±41</b>      | <b>66</b>          | Q1LI26 ATP-dependent DNA helicase RecQ                            |
| <b>Replication complex</b>        | <b>1617±174</b>    | <b>1746±267</b>    |                                                                   |
| Rmet_2298                         | NeF                | NeF                | Q8GQ10 DNA topoisomerase                                          |
| Rmet_3569                         | 1120±88            | 1042±4             | Q1LHD5 DNA topoisomerase                                          |
| Rmet_2519                         | 335±24             | 390±52             | Q1LKD0 DNA topoisomerase IV subunit A                             |
| Rmet_2607, DnaG                   | 161±61             | 314±211            | Q1LK42 DNA primase                                                |
| <b>Transcription</b>              | <b>16,512±966</b>  | <b>18,626±3315</b> |                                                                   |
| <b>RNA polymerase</b>             | <b>16,512±966</b>  | <b>18,626±3315</b> |                                                                   |
| Rmet_3291, RpoA <sup>2</sup>      | 6895±498           | 8414±1248          | Q1LI63 DNA-directed RNA polymerase subunit alpha                  |
| Rmet_3334, RpoB <sup>3</sup>      | 4908±340           | 5411±962           | Q1LI20 DNA-directed RNA polymerase subunit beta                   |
| Rmet_3333, RpoC <sup>4</sup>      | 4709±128           | 4801±1105          | Q1LI21 DNA-directed RNA polymerase subunit beta'                  |
| <b>Translation</b>                | <b>33,182±2899</b> | <b>35,959±2301</b> |                                                                   |
| <b>Other translation proteins</b> | <b>2297±221</b>    | <b>2685±502</b>    |                                                                   |
| Rmet_0049, GatA                   | 1246±134           | 1435±272           | Q1LSE1 Glutamyl-tRNA(Gln) amidotransferase subunit A              |
| Rmet_0046, GatB                   | 1051±87            | 1250±230           | Q1LSE4 Aspartyl/glutamyl-tRNA(Asn/Gln) amidotransferase subunit B |
| <b>Ribosome</b>                   | <b>30,884±2678</b> | <b>33,274±1800</b> |                                                                   |
| Rmet_3314, RplB                   | 8352±824           | 8668±102           | Q1LI40 50S ribosomal protein L2                                   |
| Rmet_0411, RplM                   | 7992±1046          | 8961±1057          | Q1LRC9 30S ribosomal protein S9                                   |
| Rmet_1435, RpsB                   | 6441±349           | 6218±114           | Q1LNF8 30S ribosomal protein S2                                   |
| Rmet_0921, RpsO                   | 4847±392           | 5282±473           | Q1LPW9 30S ribosomal protein S15                                  |
| Rmet_3308, RpsQ                   | 3251±67            | 4144±55            | Q1LI46 30S ribosomal protein S17                                  |

**Human Diseases****(0.15%)****164±43****98±12****Neurodegenerative Disorders****164±43****98±12****Amyotrophic lateral sclerosis (ALS)****164±43****98±12**

|                                            |                           |                           |                                                                                                              |
|--------------------------------------------|---------------------------|---------------------------|--------------------------------------------------------------------------------------------------------------|
| Rmet_2757                                  | <b>164±43</b>             | <b>98±12</b>              | Q1LJP6 Superoxide dismutase (Cu-Zn)                                                                          |
| <b><u>Metabolism (37.5%)</u></b>           | <b><u>41,195±4379</u></b> | <b><u>43,768±5669</u></b> |                                                                                                              |
| <b><u>Amino Acid Metabolism</u></b>        | <b><u>18,399±1700</u></b> | <b><u>19,383±3279</u></b> |                                                                                                              |
| <b>Alanine and aspartate</b>               | <b>1794±284</b>           | <b>1624±248</b>           |                                                                                                              |
| Rmet_0831, AlaS                            | 1794±284                  | 1624±248                  | Q1LQ59 Alanyl-tRNA synthetase                                                                                |
| <b>Cysteine</b>                            | <b>748±32</b>             | <b>935±24</b>             |                                                                                                              |
| Rmet_1100                                  | NeF                       | NeF                       | Q1LPE0 Cysteinyl-tRNA synthetase                                                                             |
| Rmet_1085, CysS                            | 748±32                    | 935±24                    | Q1LPF5 Cysteinyl-tRNA synthetase                                                                             |
| <b>Glutamate metabolism (PATH:ko00251)</b> | <b>1047±149</b>           | <b>1160±42</b>            |                                                                                                              |
| Rmet_2140, GltX                            | 1047±149                  | 1160±42                   | Q1LLF7 Glutamyl-tRNA synthetase                                                                              |
| <b>Glycine. serine. threonine</b>          | <b>1119±45</b>            | <b>1126±223</b>           |                                                                                                              |
| Rmet_1160, ThrS                            | 1119±45                   | 1126±223                  | Q1LP80 Threonyl-tRNA synthetase / Ser-tRNA(Thr) hydrolase                                                    |
| <b>Lysine</b>                              | <b>859±42</b>             | <b>1113±338</b>           |                                                                                                              |
| Rmet_1420                                  | 859±42                    | 1113±338                  | Q1LNH3 Succinyldiaminopimelate desuccinylase                                                                 |
| <b>Methionine</b>                          | <b>11,055±930</b>         | <b>11,402±1986</b>        |                                                                                                              |
| Rmet_4564                                  | 3887±412                  | 4022±138                  | Q1LEK0 Methionine synthase (B12-independent)                                                                 |
| Rmet_5072                                  | 3925±194                  | 4886±907                  | Q1LD42 Methionine synthase (B12-independent)                                                                 |
| Rmet_2769, MetG                            | 2075±222                  | 1576±614                  | Q1LJN4 Methionyl-tRNA synthetase                                                                             |
| Rmet_0087                                  | 664±15                    | 628±243                   | Q1LSA3 Methionine synthase (B12-dependent)                                                                   |
| Rmet_0088                                  | 504±87                    | <b>290±84</b>             | Q1LSA2 Methionine synthase (B12-dependent)                                                                   |
| <b>Urea cycle. amino group</b>             | <b>516±149</b>            | <b>657±227</b>            |                                                                                                              |
| Rmet_1956                                  | 516±149                   | 657±227                   | Q1LLZ1 Acetylornithine deacetylase / acetylornithine deacetylase ArgE. Metallo peptidase. MEROPS family M20A |
| Rmet_1610                                  | NeF                       | NeF                       | Q1LMY3 Acetylornithine deacetylase or succinyl-diaminopimelate desuccinylase                                 |

|                                 |                   |                 |                                                          |
|---------------------------------|-------------------|-----------------|----------------------------------------------------------|
| <b>Valine.</b>                  | <b>leucine.</b>   |                 |                                                          |
| <b>isoleucine</b>               |                   | <b>1261±69</b>  | <b>1365±190</b>                                          |
| Rmet_2885, IleS                 |                   | 1261±69         | 1365±190 Q1LJB8 Isoleucyl-tRNA synthetase                |
| <b><u>Carbohydrate</u></b>      |                   |                 |                                                          |
| <b><u>Metabolism</u></b>        |                   | <b>5355±514</b> | <b>6415±756</b>                                          |
| <b>Fructose and mannose:</b>    |                   | <b>61±19</b>    | <b>77</b>                                                |
| Rmet_4175                       |                   | 61±19           | 77 Q1LFN4 N-acetylglucosamine 2-epimerase                |
| <b>Glycolysis</b>               | /                 |                 |                                                          |
| <b>Gluconeogenesis</b>          |                   | <b>4488±356</b> | <b>5145±437</b>                                          |
| Rmet_1492                       | NeF               | NeF             | Q1LNA1 Fructose-bisphosphate aldolase                    |
| Rmet_5102                       | NeF               | NeF             | Q1LD15 Alcohol dehydrogenase. zinc-binding               |
| Rmet_0503                       | 3706±119          | 3909±69         | Q1LR37 Fructose-bisphosphate aldolase                    |
| Rmet_3189                       | 714±204           | 1046±238        | Q1LIG5 Alcohol dehydrogenase. zinc-binding               |
| Rmet_1518                       | <b>68±33</b>      | <b>191±130</b>  | Q1LN75 Fructose-bisphosphate aldolase                    |
| <b>Pentose</b>                  | <b>phosphate</b>  |                 |                                                          |
| <b>pathway</b>                  |                   | <b>467±111</b>  | <b>493±99</b>                                            |
| Rmet_2980                       |                   | 467±111         | Q1LJ23 Transketolase                                     |
| Rmet_1513                       | <b>NF</b>         | <b>327±151</b>  | Q1LN80 Transketolase                                     |
| <b>Pyruvate metabolism</b>      |                   | <b>338±28</b>   | <b>372±69</b>                                            |
| Rmet_0562                       |                   | 338±28          | Q1LQX8 Acetate kinase                                    |
| <b><u>Energy Metabolism</u></b> |                   | <b>7473±883</b> | <b>8106±184</b>                                          |
| <b>ATPases</b>                  |                   | <b>478±288</b>  | <b>NF</b>                                                |
| Rmet_4594, ZntA                 |                   | 396±288         | <b>NF</b> Q1LEH0 Heavy metal translocating P-type ATPase |
| Rmet_2303, CadA                 |                   | 82              | <b>NF</b> A7HYL0 Heavy metal translocating P-type ATPase |
| <b>Methane</b>                  | <b>metabolism</b> |                 |                                                          |
| <b>(PATH:ko00680)</b>           |                   | <b>5999±507</b> | <b>6981±169</b>                                          |
| Rmet_2680                       |                   | 4867±392        | 5474±143 Q1LJX3 Serine hydroxymethyltransferase          |
| Rmet_4784                       |                   | 934±79          | 1310±2 Q1LDY0 Alcohol dehydrogenase. zinc-binding        |
| Rmet_0545                       |                   | 197±35          | 197±24 Q1LQZ5 Alcohol dehydrogenase. zinc-binding        |
| <b>Nitrogen</b>                 | <b>metabolism</b> |                 |                                                          |
| <b>(PATH:ko00910)</b>           |                   | <b>995±87</b>   | <b>1125±14</b>                                           |

|                                                    |                        |                        |                                                                     |
|----------------------------------------------------|------------------------|------------------------|---------------------------------------------------------------------|
| Rmet_5185                                          | NeF                    | NeF                    | Q1LCT2 Carbonic anhydrase                                           |
| Rmet_5605                                          | <b>NF</b>              | NF                     | Q1LBL2 Carbonic anhydrase                                           |
| Rmet_0105                                          | 962±87                 | 1125±14                | Q1LS85 Carbonic anhydrase                                           |
| Rmet_2078                                          | 33                     | NF                     | Q1LLL9 Carbonic anhydrase                                           |
| <b><u>Glycan Biosynthesis and Metabolism</u></b>   | <b><u>598±65</u></b>   | <b><u>630±79</u></b>   |                                                                     |
| <b><u>Lipopolysaccharide biosynthesis</u></b>      | <b><u>598±65</u></b>   | <b><u>630±79</u></b>   |                                                                     |
| Rmet_1445, LpxD                                    | 506±26                 | 556±27                 | Q1LNE8 UDP-3-O-(3-hydroxymyristoyl) glucosamine N-acyltransferase   |
| Rmet_3121, LpxC                                    | 92±39                  | 74±52                  | Q1LIN3 UDP-3-O-(3-hydroxymyristoyl) N-acetylglucosamine deacetylase |
| <b><u>Metabolism of Cofactors and Vitamins</u></b> | <b><u>5184±723</u></b> | <b><u>4382±837</u></b> |                                                                     |
| <b><u>Folate biosynthesis</u></b>                  | <b><u>1583±189</u></b> | <b><u>456±257</u></b>  |                                                                     |
| Rmet_4085                                          | 17                     | NF                     | Q1LFX4 Alkaline phosphatase                                         |
| Rmet_3990                                          | 181±112                | 246±72                 | Q1LG68 GTP cyclohydrolase                                           |
| Rmet_2441, MoaA                                    | 137±77                 | 73±33                  | Q1LKK8 GTP cyclohydrolase subunit MoaA                              |
| Rmet_4084                                          | <b>1248</b>            | <b>137±152</b>         | Q1LFX5 Alkaline phosphatase                                         |
| <b><u>Porphyrin and chlorophyll</u></b>            | <b><u>1824±168</u></b> | <b><u>2012±2</u></b>   |                                                                     |
| Rmet_3286                                          | 1824±168               | 2012±2                 | Q1LI68 Delta-aminolevulinic acid dehydratase                        |
| <b><u>Riboflavin</u></b>                           | <b><u>190±47</u></b>   | <b><u>252±107</u></b>  |                                                                     |
| Rmet_0194                                          | 190±47                 | 252±107                | Q1LRZ6 GTP cyclohydrolase-2                                         |
| <b><u>Ubiquinone</u></b>                           | <b><u>665±38</u></b>   | <b><u>581±169</u></b>  |                                                                     |
| Rmet_0711                                          | 599±11                 | 540±156                | Q1LQH9 3-demethylubiquinone-9 3-methyltransferase                   |
| Rmet_3848                                          | 66±27                  | 41±13                  | Q1LGL0 3-demethylubiquinone-9 3-methyltransferase                   |
| <b><u>Vitamin B6</u></b>                           | <b><u>922±281</u></b>  | <b><u>1081±303</u></b> |                                                                     |
| Rmet_2415                                          | 648±155                | 880±276                | Q1LKN4 Pyridoxal phosphate biosynthetic protein PdxJ                |
| Rmet_0438                                          | 274±126                | 201±27                 | Q1LRA2 4-hydroxythreonine-4-phosphate dehydrogenase                 |
| <b><u>Nucleotide Metabolism</u></b>                | <b><u>4186±494</u></b> | <b><u>4853±534</u></b> |                                                                     |



**Purine metabolism  
(PATH:ko00230)**

|           |                |                 |                                           |
|-----------|----------------|-----------------|-------------------------------------------|
|           | <b>833±140</b> | <b>1072±110</b> |                                           |
| Rmet_2624 | 323±22         | 414±20          | Q1LK25 DNA polymerase I                   |
| Rmet_0889 | 247±25         | 265±12          | Q1LQ01 Guanine deaminase                  |
| Rmet_3443 | 171±89         | 228±30          | Q1LHR1 Amidase. hydantoinase/carbamoylase |
| Rmet_3722 | 93±4           | 165±49          | Q1LGY2 CMP/dCMP deaminase. zinc-binding   |

**Pyrimidine metabolism  
(PATH:ko00240)**

|                 |                 |                 |                                                         |
|-----------------|-----------------|-----------------|---------------------------------------------------------|
|                 | <b>3352±354</b> | <b>3781±425</b> |                                                         |
| Rmet_1103       | NeF             | NeF             | Q1LPD7 Dihydroorotase                                   |
| Rmet_4568       | NeF             | NeF             | Q1LEJ6 Amidohydrolase 3                                 |
| Rmet_2740, PyrB | 1099±106        | 1152±219        | Q1LJR3 Aspartate carbamoyltransferase                   |
| Rmet_2739       | 1166±95         | 1281±111        | Q1LJR4 Dihydroorotase                                   |
| Rmet_0406       | 618±114         | 760±62          | Q1LRD4 Dihydroorotase                                   |
| Rmet_2889       | 469±39          | 588±33          | Q1LJB4 Deoxyuridine 5'-triphosphate nucleotidohydrolase |

**Not assigned to KO  
(11.9%)**

|                  |                    |                    |                                                   |
|------------------|--------------------|--------------------|---------------------------------------------------|
|                  | <b>13,115±1698</b> | <b>16,732±1818</b> |                                                   |
| Rmet_1436, Tsf   | 4224±164           | 4521±129           | Q1LNF7 Elongation factor Ts                       |
| Rmet_0127, CobW2 | 1755±195           | <b>2129±10</b>     | Q1LS63 Cobalamin synthesis protein. P47K          |
| Rmet_0924        | 1244±293           | 1329±361           | Q1LPW6 Alcohol dehydrogenase. zinc-binding        |
| Rmet_1191        | 1185±66            | 1523±221           | Q1LP49 Oligopeptidase A. Metallo peptidase.       |
| Rmet_0432        | 1121±160           | 1477±194           | Q1LRA8 Aminopeptidase P. Metallo peptidase.       |
| Rmet_0197        | 794±122            | 882±80             | Q1LRZ3 Alcohol dehydrogenase. zinc-binding        |
| Rmet_1849        | 410±101            | 487±94             | Q1LM98 Alcohol dehydrogenase. zinc-binding        |
| Rmet_5925        | 396±140            | 572±10             | Q1LAP2 3-demethylubiquinone-9 3-methyltransferase |
| Rmet_3442        | 384±9              | 537±33             | Q1LHR2 Acetylornithine deacetylase                |
| Rmet_2119        | 359±158            | 417±145            | Q1LLH8 Alcohol dehydrogenase. zinc-binding        |
| Rmet_5645        | <b>286±61</b>      | <b>621±259</b>     | Q1LBH2 Alcohol dehydrogenase. zinc-binding        |
| Rmet_0125, CobW3 | 263±68             | 324±132            | Q1LS65 Cobalamin synthesis CobW-like protein      |
| Rmet_3067        | 164±31             | 101±61             | Q1LIT7 Zinc finger/thioredoxin putative           |
| Rmet_1573        | <b>111±77</b>      | <b>41±9</b>        | Q1LN20 tRNA-adenosine deaminase                   |

|                 |              |              |                                                          |
|-----------------|--------------|--------------|----------------------------------------------------------|
| Rmet_1442       | 90±20        | 61±7         | Q1LNF1 RseP peptidase. Metallo peptidase.                |
| Rmet_4467       | <b>81±13</b> | <b>251±8</b> | Q1LEU4 3-demethylubiquinone-9 3-methyltransferase        |
| Rmet_0128, FurC | 77±17        | 102±26       | Q1LS62 Putative ferric uptake regulator. FUR family      |
| Rmet_5912       | <b>59</b>    | <b>490</b>   | Q1LAQ5 Transcriptional regulator Ada                     |
| Rmet_4804       | <b>58</b>    | NF           | Q1LDW0 L-threonine 3-dehydrogenase                       |
| Rmet_4293       | <b>32</b>    | <b>70</b>    | Q1LFB7 Alcohol dehydrogenase. zinc-binding               |
| Rmet_4439       | 321          | <b>0</b>     | Q1LEX2 Dihydroorotase                                    |
| Rmet_4628       | 183          | <b>0</b>     | Q1LED6 Alcohol dehydrogenase. zinc-binding               |
| Rmet_5746       | <b>23</b>    | <b>50</b>    | Q1LB71 Ferric uptake regulator. Fur family               |
| Rmet_2583       | <b>NF</b>    | <b>727</b>   | Q1LK66 Alkaline phosphatase                              |
| Rmet_4293       | <b>32</b>    | <b>70</b>    | Q1LFB7 Alcohol dehydrogenase. zinc-binding               |
| Rmet_5285       | <b>NF</b>    | <b>20</b>    | Q1LCI2 Alcohol dehydrogenase. zinc-binding               |
| Rmet_0293       | NeF          | NeF          | Q1LRP7 Formamidopyrimidine-DNA glycosylase               |
| Rmet_0551       | NeF          | NeF          | Q1LQY9 Hycolysin. Metallo peptidase. MEROPS family M30   |
| Rmet_1102       | NF           | NF           | Q1LPD8 Carbonic anhydrases/acetyltransferase             |
| Rmet_1716       | NeF          | NeF          | Q1LMM9 Alcohol dehydrogenase. zinc-binding               |
| Rmet_1909       | NeF          | NeF          | Q1LM38 Alcohol dehydrogenase. zinc-binding               |
| Rmet_2057       | NeF          | NeF          | Q1LLP0 Hycolysin. Metallo peptidase. MEROPS family M30   |
| Rmet_2613       | NeF          | NeF          | Q1LK36 Alkaline phosphatase                              |
| Rmet_3085       | NeF          | NeF          | Q1LIR9 Alcohol dehydrogenase. zinc-binding               |
| Rmet_3150       | NeF          | NeF          | Q1LIK4 Putative zinc protease protein                    |
| Rmet_3352       | NeF          | NeF          | Q1LI02 Cytidine/deoxycytidylate deaminase family protein |
| Rmet_3354       | NeF          | NeF          | Q1LI00 CMP/dCMP deaminase. zinc-binding                  |
| Rmet_4281       | NeF          | NeF          | Q1LFC9 Alcohol dehydrogenase. zinc-binding               |
| Rmet_4406       | NeF          | NeF          | Q1LF05 Zinc finger. CDGSH-type                           |
| Rmet_4572       | NeF          | NeF          | Q1LEJ2 GTP cyclohydrolase II                             |
| Rmet_4852       | NeF          | NeF          | Q1LDR2 Alcohol dehydrogenase. zinc-binding               |

|           |     |     |                                            |
|-----------|-----|-----|--------------------------------------------|
| Rmet_5495 | NeF | NeF | Q1LBX2 Alcohol dehydrogenase. zinc-binding |
| Rmet_5498 | NeF | NeF | Q1LBW9 Oxidoreductase. zinc-binding        |

**CONTROL: Co-binding proteins**

|              |                 |                 |                                               |
|--------------|-----------------|-----------------|-----------------------------------------------|
| <b>TOTAL</b> | <b>1302±169</b> | <b>1035±413</b> |                                               |
| Rmet_0087    | 664±15          | 628±243         | Q1LSA3 Methionine synthase (B12-dependent)    |
| Rmet_0088    | 504±87          | 290±84          | Q1LSA2 Methionine synthase (B12-dependent)    |
| Rmet_0210    | 134±67          | 118±86          | Q1LRY0 Methylmalonyl-CoA mutase               |
| Rmet_5902    | NeF             | NeF             | Q1LAR5 Ethanolamine ammonia-lyase heavy chain |

---

<sup>a</sup>All homologs to zinc- and cobalt-binding proteins from *E. coli*<sup>5</sup> in the *C. metallidurans* proteome (WT, AE104; Mut,  $\Delta zupT$ ) were identified and their numbers sorted into the KEGG orthology groups<sup>1</sup>. “NeF”, never, “NF” not found in the proteome analysis. Numbers in red indicate down-regulation, in green up-regulation, bold numbers significant differences, italics not significant differences between CH34/AE104 (AE104 data) or AE104/ $\Delta zupT$  ( $\Delta zupT$  data).

**Supplementary Literature**

1. M. Kanehisa, S. Goto, M. Hattori, K. F. Aoki-Kinoshita, M. Itoh, S. Kawashima, T. Katayama, M. Araki and M. Hirakawa, *Nucleic Acids Res*, 2006, **34**, D354-357.
2. A. Katayama, A. Tsujii, A. Wada, T. Nishino and A. Ishihama, *Eur J Biochem*, 2002, **269**, 2403-2413.
3. F. Y. H. Wu, W. J. Huang, R. B. Sinclair and L. Powers, *J Biol Chem*, 1992, **267**, 25560-25567.
4. R. Sen, R. A. King, N. Mzhavia, P. L. Madsen and R. A. Weisberg, *Mol Microbiol*, 2002, **46**, 215-222.
5. D. H. Nies and G. Grass, in *EcoSal—Escherichia coli and Salmonella: cellular and molecular biology*, eds. A. Böck, R. Curtiss III, J. B. Kaper, F. C. Neidhardt, T. Nyström, K. E. Rudd and C. L. Squires, ASM Press, Washington, D.C., 2009, doi: 10.1128/ecosal.5.4.4.3.
