# Supplementary material for: The zinc repository of Cupriavidus metallidurans
Source: Royal Society of Chemistry journal article supplement (doi:10.1039/c4mt00171k), 2014-09-24
Supplement: c4mt00171k2.xlsx [file c4mt00171k2.xlsx]

## Sheet: All Proteins
Comparison of strain AE104 and its mutant, predicted numbers per cell. NeF, never found; NF not found; NQ, not quantified. Red numbers show down-regulation between AE104/CH34 and ∆zupT/AE104, respectively, and green numbers
up-regulation (2-fold). Numbers in italics indicate not significant differences, overlapping deviation bars of the values or proteins found only in one strain.
Rmet	MeanAE104	DevAE104	Mean∆zupT	Dev∆zupT	protein.Accession	Description
Rmet_0001	431.578	232.942	598.906	172.714	YP_582156.1	Q1LSI9 Chromosomal replication initiator protein dnaA
Rmet_0002	2438.14	24.5518	2272.12	52.1165	YP_582157.1	Q1LSI8 DNA polymerase III, beta subunit
Rmet_0003	1359.54	188.182	1015.5	25.9037	YP_582158.1	Q1LSI7 DNA gyrase subunit B
Rmet_0004	175.342	109.163	72.4014	51.6857	YP_582159.1	Q1LSI6 Putative uncharacterized protein
Rmet_0005	218.558	6.57077	156.517	13.4017	YP_582160.1	Q1LSI5 Twin-arginine translocation pathway signal
Rmet_0006	NeF		NeF		YP_582161.1	Q1LSI4 Putative uncharacterized protein
Rmet_0007	NeF		NeF		YP_582162.1	Q1LSI3 Transcriptional regulator, AraC family
Rmet_0008	10.8397		NF/NF		YP_582163.1	Q1LSI2 Binding-protein-dependent transport systems inner membrane component
Rmet_0009	NeF		NeF		YP_582164.1	Q1LSI1 Binding-protein-dependent transport systems inner membrane component
Rmet_0010	NeF		NeF		YP_582165.1	Q1LSI0 ABC transporter-related protein
Rmet_0011	NeF		NeF		YP_582166.1	Q1LSH9 Twin-arginine translocation pathway signal
Rmet_0012	NeF		NeF		YP_582167.1	Q1LSH8 Isoprenylcysteine carboxyl methyltransferase
Rmet_0013	NeF		NeF		YP_582168.1	Q1LSH7 Putative uncharacterized protein
Rmet_0014	NeF		NeF		YP_582169.1	Q1LSH6 Putative uncharacterized protein
Rmet_0015	NeF		NeF		YP_582170.1	Q1LSH5 DEAD/DEAH box helicase-like protein
Rmet_0016	141.802	47.8079	235.566	54.5419	YP_582171.1	Q1LSH4 Putative signal-transduction protein with CBS domains
Rmet_0017	NeF		NeF		YP_582172.1	Q1LSH3 Drug resistance transporter EmrB/QacA subfamily
Rmet_0018	143.897	12.6871	47.384	17.557	YP_582173.1	Q1LSH2 Glutathione peroxidase
Rmet_0019	25.3679		99.9305		YP_582174.1	Q1LSH1 Beta-lactamase-like protein
Rmet_0020	747.167	40.9068	944.403	42.0467	YP_582175.1	Q1LSH0 Fumarylacetoacetate (FAA) hydrolase
Rmet_0021	73.2442	2.60249	NF/NF		YP_582176.1	Q1LSG9 Peptidase M20D, amidohydrolase
Rmet_0022	29.2071	7.31969	NF/NF		YP_582177.1	Q1LSG8 Transcriptional regulator, AraC family
Rmet_0023	NeF		NeF		YP_582178.1	Q1LSG7 Major facilitator superfamily MFS_1
Rmet_0024	800.657	107.59	540.473	15.1216	YP_582179.1	Q1LSG6 Peptidase dimerisation
Rmet_0025	63.3737	12.0537	41.1741		YP_582180.1	Q1LSG5 Putative uncharacterized protein
Rmet_0026	378.288	20.1232	172.512	47.1048	YP_582181.1	Q1LSG4 Uncharacterized protein UPF0065
Rmet_0027	NF/NF		NF/NF		YP_582182.1	Q1LSG3 Two component transcriptional regulator, winged helix family
Rmet_0028	NF/NF		38.712		YP_582183.1	Q1LSG2 Two component transcriptional regulator, winged helix family
Rmet_0029	NQ/NQ		NQ/NQ		YP_582185.2	Q1LSG1 Porin, Gram-negative type
Rmet_0032	NeF		NeF		YP_582186.1	Q1LSF8 Porin, gram-negative type
Rmet_0033	652.163	59.532	726.41	42.2066	YP_582188.1	Q1LSF7 Cell division topological specificity factor
Rmet_0034	1772.55	64.8649	1423.7	144.514	YP_582189.1	Q1LSF6 Septum site-determining protein MinD
Rmet_0035	541.454	10.3784	597.395	99.4234	YP_582190.1	Q1LSF5 Probable septum site-determining protein minC
Rmet_0036	37.6604	18.6413	NF/NF		YP_582191.1	Q1LSF4 Mg2+ transporter protein, CorA-like protein
Rmet_0037	NeF		NeF		YP_582192.2	Q1LSF3 Putative uncharacterized protein
Rmet_0038	NeF		NeF		YP_582193.1	Q1LSF2 Potassium-transporting ATPase, A subunit
Rmet_0039	NeF		NeF		YP_582194.1	Q1LSF1 Potassium-translocating P-type ATPase, B subunit
Rmet_0040	NeF		NeF		YP_582195.1	Q1LSF0 Potassium-transporting ATPase, C subunit
Rmet_0041	NeF		NeF		YP_582196.1	Q1LSE9 Sensor protein
Rmet_0042	40.1701	4.54887	48.5427	6.7615	YP_582197.1	Q1LSE8 Two component transcriptional regulator, winged helix family
Rmet_0043	NF/NF		NF/NF		YP_582198.1	Q1LSE7 Sel1
Rmet_0044	NeF		NeF		YP_582199.1	Q1LSE6 Putative uncharacterized protein
Rmet_0045	NeF		NeF		YP_582200.1	Q1LSE5 Transglutaminase-like protein
Rmet_0046	1051.27	87.272	1249.76	229.532	YP_582201.1	Q1LSE4 Aspartyl/glutamyl-tRNA(Asn/Gln) amidotransferase subunit B
Rmet_0047	58.7907	39.7941	134.899		YP_582202.1	Q1LSE3 Dienelactone hydrolase
Rmet_0048	75.7292	26.5935	61.2028	5.671	YP_582203.1	Q1LSE2 Putative lipoprotein
Rmet_0049	1246.09	133.817	1435.16	271.998	YP_582204.1	Q1LSE1 Glutamyl-tRNA(Gln) amidotransferase subunit A
Rmet_0050	193.675	16.556	244.044	40.5173	YP_582205.1	Q1LSE0 Aspartyl/glutamyl-tRNA(Asn/Gln) amidotransferase subunit C
Rmet_0051	1414.91	7.57469	592.896	113.864	YP_582206.1	Q0KFF6 Rod shape-determining protein MreB
Rmet_0052	135.509	69.7349	14.5543		YP_582207.1	Q1LSD8 Rod shape-determining protein MreC
Rmet_0053	29.7911		NF/NF		YP_582208.1	Q1LSD7 Rod shape-determining protein MreD
Rmet_0054	37.4481		NF/NF		YP_582209.1	Q1LSD6 Peptidoglycan glycosyltransferase
Rmet_0055	22.0648		NF/NF		YP_582210.1	Q1LSD5 Rod shape-determining protein RodA
Rmet_0056	668.908	101.687	724.463	82.2901	YP_582211.1	Q1LSD4 Putative uncharacterized protein
Rmet_0057	184.222	157.624	NF/NF		YP_582212.1	Q1LSD3 Tyrosine recombinase XerC subunit
Rmet_0058	15.1485		NF/NF		YP_582213.1	Q1LSD2 Transcriptional regulator, LysR family
Rmet_0059	NeF		NeF		YP_582214.1	Q1LSD1 Putative uncharacterized protein
Rmet_0060	NF/NF		NF/NF		YP_582215.1	Q1LSD0 Lipoate-protein ligase B
Rmet_0061	513.368	97.6231	692.216	193.238	YP_582216.1	Q1LSC9 Lipoyl synthase
Rmet_0062	43.2086	4.53496	81.7962	50.3308	YP_582217.1	Q1LSC8 Putative uncharacterized protein
Rmet_0063	75.0977		NF/NF		YP_582218.1	Q1LSC7 Allophanate hydrolase subunit 2
Rmet_0064	306.41	6.35261	301.179	157.597	YP_582219.1	Q1LSC6 UPF0271 protein Rmet_0064
Rmet_0065	25.7341		NF/NF		YP_582220.1	Q1LSC5 Putative uncharacterized protein
Rmet_0066	NeF		NeF		YP_582221.1	Q1LSC4 Putative uncharacterized protein
Rmet_0067	558.102	211.323	601.332	270.471	YP_582222.1	Q1LSC3 Pyroglutamyl-peptidase I. Cysteine peptidase. MEROPS family C15
Rmet_0068	NeF		NeF		YP_582223.1	Q1LSC2 VanZ like protein
Rmet_0069	107.944	50.2262	61.9354	11.7731	YP_582224.1	Q1LSC1 Putative lipoprotein
Rmet_0070	94.9827	39.828	105.734	45.9652	YP_582225.1	Q1LSC0 Mammalian cell entry related
Rmet_0071	84.2897	35.1391	33.0679	2.739	YP_582226.1	Q1LSB9 ABC transporter-related protein
Rmet_0072	NeF		NeF		YP_582227.1	Q1LSB8 Putative uncharacterized protein
Rmet_0073	136.502	18.571	111.169	40.5011	YP_582228.1	Q1LSB7 Biotin--acetyl-CoA-carboxylase ligase
Rmet_0074	100.964	33.4599	142.901	59.3384	YP_582229.1	Q1LSB6 Type III pantothenate kinase
Rmet_0075	NF/NF		NF/NF		YP_582230.1	Q1LSB5 Sporulation related
Rmet_0076	83.6665	22.4983	63.0888	17.4502	YP_582231.1	Q1LSB4 RfaE bifunctional protein, domain II
Rmet_0077	782.402	178.844	733.832	117.622	YP_582232.1	Q1LSB3 Putative uncharacterized protein
Rmet_0078	NeF		NeF		YP_582233.1	Q1LSB2 Patatin
Rmet_0079	488.998	294.352	422.131	172.095	YP_582234.1	Q1LSB1 Putative uncharacterized protein
Rmet_0080	58.4004	1.02411	86.6104	3.55383	YP_582235.1	Q1LSB0 Enoyl-CoA hydratase/isomerase
Rmet_0081	329.786	13.3731	381.125	7.86207	YP_582236.1	Q1LSA9 Fumarylacetoacetate (FAA) hydrolase
Rmet_0082	87.9634	11.7829	64.5073	11.1276	YP_582237.1	Q1LSA8 Transcriptional regulator, IclR family
Rmet_0083	NeF		NeF		YP_582238.1	Q1LSA7 Putative prolin-rich signal peptide protein
Rmet_0084	NeF		NeF		YP_582239.1	Q1LSA6 3-oxoadipate enol-lactonase
Rmet_0085	NF/NF		29.2473		YP_582240.1	Q1LSA5 Putative uncharacterized protein
Rmet_0086	234.547	34.8291	266.775	35.5689	YP_582241.1	Q1LSA4 Rhodanese-like protein
Rmet_0087	663.56	14.7471	627.537	242.794	YP_582242.1	Q1LSA3 Methionine synthase (B12-dependent)
Rmet_0088	503.907	87.2215	290.146	84.3868	YP_582243.1	Q1LSA2 Methionine synthase (B12-dependent)
Rmet_0089	NeF		NeF		YP_582244.1	Q1LSA1 Cell wall surface anchor family protein
Rmet_0090	467.167	184.783	415.721	83.0294	YP_582245.1	Q1LSA0 Two component transcriptional regulator, LuxR family
Rmet_0091	NeF		NeF		YP_582246.1	Q1LS99 Response regulator receiver domain protein (CheY-like)
Rmet_0092	46.153		NF/NF		YP_582247.1	Q1LS98 Histidine kinase
Rmet_0093	NeF		NeF		YP_582248.1	Q1LS97 UPF0391 membrane protein Rmet_0093
Rmet_0094	484.98	177.338	539.178	25.9056	YP_582249.1	Q1LS96 Putative uncharacterized protein
Rmet_0095	651.549	282.891	946.799	352.018	YP_582250.1	Q1LS95 Putative uncharacterized protein
Rmet_0096	1155.15	224.348	1265.07	227.633	YP_582251.1	Q1LS94 Arginyl-tRNA synthetase
Rmet_0097	589.461	127.569	244.551	86.3764	YP_582252.1	Q1LS93 Sporulation related
Rmet_0098	1985.95	631.86	955.653	283.847	YP_582253.1	Q1LS92 DSBA oxidoreductase
Rmet_0099	55.351	22.7214	39.9109	8.56034	YP_582254.1	Q1LS91 Short-chain dehydrogenase/reductase SDR
Rmet_0100	NeF		NeF		YP_582255.1	Q1LS90 Putative uncharacterized protein
Rmet_0101	240.62	26.8266	386.225	13.9423	YP_582256.1	Q1LS89 Beta-lactamase-like protein
Rmet_0102	79.213		36.2583	11.647	YP_582257.1	Q1LS88 Transcriptional regulator, MerR family
Rmet_0103	425.563	21.9311	507.109	64.2537	YP_582258.1	Q1LS87 Isovaleryl-CoA dehydrogenase
Rmet_0104	NeF		NeF		YP_582259.1	Q1LS86 Isocitrate dehydrogenase kinase/phosphatase
Rmet_0105	962.328	87.2483	1124.53	14.4128	YP_582260.1	Q1LS85 Carbonic anhydrase
Rmet_0106	758.888	170.976	912.289	233.74	YP_582261.1	Q1LS84 Thiolase
Rmet_0107	458.295	90.0157	453.54	118.257	YP_582262.1	Q1LS83 Short-chain dehydrogenase/reductase SDR
Rmet_0108	285.492	5.70793	318.165	5.92773	YP_582263.1	Q1LS82 Acyl-CoA dehydrogenase-like protein
Rmet_0109	1151.82	87.5265	1026	52.9267	YP_582264.1	Q1LS81 DSBA oxidoreductase
Rmet_0110	674.658	268.953	639.035	264.346	YP_582265.1	Q1LS80 HAD-superfamily hydrolase subfamily IA, variant 3
Rmet_0111	NeF		NeF		YP_582266.1	Q1LS79 UPF0225 protein Rmet_0111
Rmet_0112	NeF		NeF		YP_582267.1	Q1LS78 Conserved hypothetical signal peptide protein
Rmet_0113	746.874	96.5359	889.7	173.398	YP_582268.1	Q1LS77 Enoyl-CoA hydratase/isomerase
Rmet_0114	1807.51	387.526	1703.84	276.563	YP_582269.1	Q1LS76 Adenosylmethionine-8-amino-7-oxononanoate aminotransferase
Rmet_0115	1588.65	693.791	1445.88	679.024	YP_582270.1	Q1LS75 8-amino-7-oxononanoate synthase
Rmet_0116	1534	469.538	1546.16	577.441	YP_582271.1	Q1LS74 Dethiobiotin synthase
Rmet_0117	4380.46	227.755	4452.71	492.662	YP_582272.3	Q1LS73 Biotin synthase
Rmet_0118	1841.6	274.296	2189.19	267.369	YP_582273.1	Q1LS72 D-isomer specific 2-hydroxyacid dehydrogenase, NAD-binding
Rmet_0119	588.616	64.2036	630.656	130.463	YP_582274.1	Q1LS71 YbaK/prolyl-tRNA synthetase associated region
Rmet_0120	33.6789	20.1353	31.857	1.47974	YP_582275.1	Q1LS70 Putative uncharacterized protein
Rmet_0121	409.106	246.351	264.195	101.528	YP_582276.1	Q1LS69 Beta-lactamase-like protein
Rmet_0122	48.9517	8.59208	62.5054	15.7199	YP_582277.1	Q1LS68 GCN5-related N-acetyltransferase
Rmet_0123	NeF		NeF		YP_582278.1	Q1LS67 TonB-dependent receptor
Rmet_0124	NeF		NeF		YP_582279.1	Q1LS66 Putative uncharacterized protein
Rmet_0125	262.909	68.1997	324.052	131.916	YP_582280.1	Q1LS65 Cobalamin synthesis CobW-like protein
Rmet_0126	3282.71	110.67	3587.8	40.9556	YP_582281.1	Q1LS64 Transcriptional regulators, TraR/DksA family
Rmet_0127	1754.86	194.669	2128.81	9.6895	YP_582282.1	Q1LS63 Cobalamin synthesis protein, P47K
Rmet_0128	77.3676	16.593	102.252	26.4409	YP_582283.1	Q1LS62 Putative ferric uptake regulator, FUR family
Rmet_0129	501.407		NF/NF		YP_582284.1	Q1LS61 Alpha/beta hydrolase fold
Rmet_0130	6789.15	348.643	4525.16	1096.08	YP_582285.1	Q1LS60 Uncharacterized protein UPF0065
Rmet_0131	NF/NF		39.7233		YP_582286.1	Q1LS59 ATP-dependent protease hslV
Rmet_0132	979.583	175.063	1105.39	286.758	YP_582287.1	Q1LS58 Heat shock protein HslVU, ATPase subunit HslU
Rmet_0133	2583.01	261.793	1653.37	588.07	YP_582288.1	Q1LS57 Nuclear export factor GLE1
Rmet_0134	NeF		NeF		YP_582289.1	Q1LS56 Putative uncharacterized protein
Rmet_0135	522.127	176.108	478.76	189.613	YP_582290.1	Q1LS55 Response regulator receiver domain protein (CheY-like)
Rmet_0136	415.717	101.565	124.041	87.5647	YP_582291.1	Q1LS54 Sensor protein
Rmet_0137	4951.08	418.874	2818.58	2.11208	YP_582292.1	Q1LS53 Putative uncharacterized protein
Rmet_0138	239.138	31.6632	263.651	91.3553	YP_582293.1	Q1LS52 Transcriptional regulator, LysR family
Rmet_0139	NeF		NeF		YP_582294.1	Q1LS51 Putative uncharacterized protein
Rmet_0140	1852.61	199.504	2167.97	294.155	YP_582295.1	Q1LS50 Acetylglutamate kinase
Rmet_0141	74.8873	24.6308	NF/NF		YP_582296.1	Q1LS49 Pyrimidine 5-nucleotidase
Rmet_0142	723.616	93.4137	687.567	43.6632	YP_582297.1	Q1LS48 Cell division inhibitor SlmA
Rmet_0143	236.265	25.4945	142.555	31.193	YP_582298.1	Q1LS47 Homoserine O-acetyltransferase
Rmet_0144	105.181	17.157	82.4033	3.45682	YP_582299.1	Q1LS46 Methionine biosynthesis MetW
Rmet_0145	29.7476		124.967	13.679	YP_582300.1	Q1LS45 Putative uncharacterized protein
Rmet_0146	152.206	89.0599	168.426	130.508	YP_582301.1	Q1LS44 Major facilitator superfamily MFS_1
Rmet_0147	112.984	49.4147	NF/NF		YP_582302.1	Q1LS43 Peptidase M48, Ste24p
Rmet_0148	2829.88	185.937	3252.39	63.3948	YP_582303.1	Q1LS42 N-acetyl-gamma-glutamyl-phosphate reductase
Rmet_0149	411.196	21.3443	436.86	57.61	YP_582304.1	Q1LS41 Exodeoxyribonuclease III (Xth)
Rmet_0150	798.107	31.9906	923.882	166.241	YP_582305.1	Q1LS40 Orotate phosphoribosyltransferase
Rmet_0151	35.5663	6.25535	80.682	29.4073	YP_582306.1	Q1LS39 Patatin
Rmet_0152	900.452	259.022	986.875	250.152	YP_582307.1	Q1LS38 Polyphosphate:AMP phosphotransferase
Rmet_0153	285.581	27.3466	353.846	77.4063	YP_582308.1	Q1LS37 Diaminopimelate epimerase
Rmet_0154	228.494	150.902	31.3555	8.33163	YP_582309.1	Q1LS36 Lipid A biosynthesis acyltransferase
Rmet_0155	45.1303	12.1592	NF/NF		YP_582310.1	Q1LS35 Lipid A biosynthesis acyltransferase
Rmet_0156	5194.54	196.346	5140.32	113.722	YP_582311.1	Q1LS34 S-adenosylmethionine synthetase
Rmet_0157	563.052	286.347	319.061	3.82323	YP_582312.1	Q1LS33 Putative uncharacterized protein
Rmet_0158	108.5	14.9013	NF/NF		YP_582313.1	Q1LS32 Aldehyde dehydrogenase
Rmet_0159	NeF		NeF		YP_582314.1	Q1LS31 Glucose-methanol-choline oxidoreductase
Rmet_0160	109.822	28.3718	154.204	130.539	YP_582315.1	Q1LS30 Methyl-accepting chemotaxis sensory transducer
Rmet_0161	NeF		NeF		YP_582316.1	Q1LS29 Acyl-CoA dehydrogenase-like protein
Rmet_0162	1798.27	56.2394	2086.07	86.646	YP_582317.1	Q1LS28 Thiamine biosynthesis protein thiC
Rmet_0163	190.83	54.9426	187.853	56.2333	YP_582318.1	Q1LS27 FAD dependent oxidoreductase
Rmet_0164	NeF		NeF		YP_582319.1	Q1LS26 Thiamine biosynthesis protein ThiS
Rmet_0165	234.575	43.0251	290.349	11.6655	YP_582320.1	Q1LS25 Thiazole biosynthesis protein thiG
Rmet_0166	259.946	33.6281	356.773	44.7416	YP_582321.1	Q1LS24 Thiamine monophosphate synthase
Rmet_0167	192.031	46.5576	235.509	32.221	YP_582322.1	Q1LS23 Phenylacetic acid degradation-related protein
Rmet_0168	240.92	25.4095	276.313	77.776	YP_582323.1	Q1LS22 Putative uncharacterized protein
Rmet_0169	123.451	36.8189	180.202	35.3779	YP_582324.1	Q1LS21 Phosphomethylpyrimidine kinase
Rmet_0170	4288.01	27.7654	4355.95	2.83153	YP_582325.1	Q1LS20 Adenosylhomocysteinase
Rmet_0171	NeF		NeF		YP_582326.1	Q1LS19 Putative uncharacterized protein
Rmet_0172	823.518	72.6079	817.916	4.44406	YP_582327.1	Q1LS18 Methylenetetrahydrofolate reductase
Rmet_0173	NeF		NeF		YP_582328.1	Q1LS17 TfoX-like protein
Rmet_0174	NeF		NeF		YP_582329.1	Q1LS16 Putative uncharacterized protein
Rmet_0175	NeF		NeF		YP_582330.1	Q1LS15 5-formyltetrahydrofolate cyclo-ligase
Rmet_0176	661.799	196.403	598.299	143.692	YP_582331.1	Q1LS14 Lytic transglycosylase, catalytic
Rmet_0177	NeF		NeF		YP_582332.1	Q1LS13 NAD-dependent epimerase/dehydratase
Rmet_0178	552.712	66.7051	608.579	106.235	YP_582333.1	Q1LS12 Glutathione S-transferase-like protein
Rmet_0179	141.687	23.5056	73.8907	11.3486	YP_582334.1	Q1LS11 Multifunctional CCA protein
Rmet_0180	NeF		NeF		YP_582335.1	Q1LS10 Putative membrane protein
Rmet_0181	460.476	178.536	294.154	90.4341	YP_582336.1	Q1LS09 Putative uncharacterized protein
Rmet_0182	639.491	56.7069	823.008	33.9108	YP_582337.1	Q1LS08 Short-chain dehydrogenase/reductase SDR
Rmet_0183	812.572	62.3833	1033.81	208.081	YP_582338.1	Q1LS07 Dihydroneopterin aldolase
Rmet_0184	429.95	335.14	481.345	383.525	YP_582339.1	Q1LS06 tRNA 2-thiocytidine biosynthesis protein ttcA
Rmet_0185	120.078	54.0563	83.0194	56.3257	YP_582340.1	Q1LS05 Putative uncharacterized protein
Rmet_0186	505.032	54.0334	563.09	65.2151	YP_582341.1	Q1LS04 Bifunctional protein glmU
Rmet_0187	1475.82	140.977	1700.56	314.473	YP_582342.1	Q1LS03 Glutamine--fructose-6-phosphate transaminase
Rmet_0188	139.073		20.1553		YP_582343.1	Q1LS02 Pilus assembly protein
Rmet_0189	72.1648	14.7455	NF/NF		YP_582344.1	Q1LS01 Type-4 fimbrial biogenesis pilV transmembrane protein
Rmet_0190	52.8014		NF/NF		YP_582345.1	Q1LS00 Type-4 fimbrial biogenesis transmembrane protein
Rmet_0191	NeF		NeF		YP_582346.1	Q1LRZ9 Putative type-4 fimbrial biogenesis transmembrane protein
Rmet_0192	380.586	6.39232	112.989	68.499	YP_582347.1	Q1LRZ8 Putative type-4 fimbrial biogenesis pily1-related protein
Rmet_0193	NeF		NeF		YP_582348.1	Q1LRZ7 Pilus assembly protein PilE
Rmet_0194	190.098	46.5598	252.495	106.56	YP_582349.1	Q1LRZ6 GTP cyclohydrolase-2
Rmet_0195	49.4328		NF/NF		YP_582350.1	Q1LRZ5 Bacterioferritin
Rmet_0196	24.0428	5.03723	NF/NF		YP_582351.1	Q1LRZ4 GCN5-related N-acetyltransferase
Rmet_0197	794.216	121.642	882.019	79.7909	YP_582352.1	Q1LRZ3 Alcohol dehydrogenase, zinc-binding
Rmet_0198	NeF		NeF		YP_582353.1	Q1LRZ2 Cation diffusion facilitator family transporter
Rmet_0199	NeF		NeF		YP_582354.1	Q1LRZ1 Transcriptional regulator, LysR family
Rmet_0200	NeF		NeF		YP_582355.1	Q1LRZ0 3-isopropylmalate dehydratase, large subunit
Rmet_0201	NF/NF		NF/NF		YP_582356.1	Q1LRY9 3-isopropylmalate dehydratase, small subunit
Rmet_0202	123.689	13.8662	114.159	60.574	YP_582357.1	Q1LRY8 Alpha/beta hydrolase fold
Rmet_0203	NF/NF		NF/NF		YP_582358.1	Q1LRY7 Putative signal peptide protein
Rmet_0204	NeF		NeF		YP_582359.1	Q1LRY6 Transcriptional regulator, GntR family
Rmet_0205	358.165	38.2406	550.447	114.612	YP_582360.1	Q1LRY5 Aminotransferase
Rmet_0206	791.233	15.8065	928.281	26.6417	YP_582361.1	Q1LRY4 Methylmalonate-semialdehyde dehydrogenase (Acylating)
Rmet_0207	NeF		NeF		YP_582362.1	Q1LRY3 Amino acid permease-associated region
Rmet_0208	NeF		NeF		YP_582363.1	Q1LRY2 Transcriptional regulator, GntR family
Rmet_0209	NeF		NeF		YP_582364.1	Q1LRY1 Putative uncharacterized protein
Rmet_0210	134.09	66.6647	117.613	85.7618	YP_582365.1	Q1LRY0 Methylmalonyl-CoA mutase
Rmet_0211	520.249	17.7454	617.579	65.3236	YP_582366.1	Q1LRX9 Histidine triad (HIT) protein
Rmet_0212	1262.13	509.76	1507.22	433.639	YP_582367.1	Q1LRX8 3-hydroxyacyl-CoA dehydrogenase
Rmet_0213	NF/NF		122.517	105.384	YP_582368.1	Q1LRX7 Cyclic nucleotide-binding protein
Rmet_0214	NeF		NeF		YP_582369.1	Q1LRX6 AMP-dependent synthetase and ligase
Rmet_0215	NeF		NeF		YP_582370.1	Q1LRX5 ABC transporter-related protein
Rmet_0216	NeF		NeF		YP_582371.1	Q1LRX4 Inner-membrane translocator
Rmet_0217	NeF		NeF		YP_582372.1	Q1LRX3 Inner-membrane translocator
Rmet_0218	46.156		NF/NF		YP_582373.1	Q1LRX2 Putative branched-chain amino acid transport system substrate-binding protein
Rmet_0219	NF/NF		NF/NF		YP_582374.1	Q1LRX1 ABC transporter-related protein
Rmet_0220	94.8202		NF/NF		YP_582375.1	Q1LRX0 Putative phenylacetate-CoA ligase
Rmet_0221	NeF		NeF		YP_582376.1	Q1LRW9 Putative uncharacterized protein
Rmet_0222	745.715	134.313	1069.96	140.45	YP_582377.1	Q1LRW8 2-nitropropane dioxygenase, NPD
Rmet_0223	292.834	26.0832	245.031	18.6202	YP_582378.1	Q1LRW7 SAM-dependent methyltransferase
Rmet_0224	183.713	94.3643	532.32	227.955	YP_582379.1	Q1LRW6 Putative uncharacterized protein
Rmet_0225	1117.33	285.793	679.557	296.426	YP_582380.1	Q1LRW5 Penicillin-binding protein 6. Serine peptidase. MEROPS family S11
Rmet_0226	217.473	24.2192	371.938	150.112	YP_582381.1	Q1LRW4 Putative transmembrane protein
Rmet_0227	NeF		NeF		YP_582382.1	Q1LRW3 Ferredoxin-like protein
Rmet_0228	NeF		NeF		YP_582383.1	Q1LRW2 C4-dicarboxylate transport protein 1
Rmet_0229	NeF		NeF		YP_582384.1	Q1LRW1 Sensor protein
Rmet_0230	172.77	113.745	125.859	11.3542	YP_582385.1	Q1LRW0 Two component, sigma54 specific, transcriptional regulator, Fis family
Rmet_0231	NeF		NeF		YP_582386.1	Q1LRV9 Histidine ammonia-lyase
Rmet_0232	NF/NF		26.3523	2.04868	YP_582387.1	Q1LRV8 UvrD/REP helicase
Rmet_0233	616.765	121.223	1077.33		YP_582388.1	Q1LRV7 Thioredoxin-like protein
Rmet_0234	164.947	9.12629	NF/NF		YP_582389.1	Q1LRV6 Putative uncharacterized protein
Rmet_0235	47.8152	10.9034	31.6374	3.8692	YP_582390.1	Q1LRV5 Putative uncharacterized protein
Rmet_0236	NeF		NeF		YP_582391.1	Q1LRV4 Lysine exporter protein (LYSE/YGGA)
Rmet_0237	NeF		NeF		YP_582392.1	Q1LRV3 Mg chelatase-related protein
Rmet_0238	539.735	84.7673	656.373	5.41121	YP_582393.1	Q1LRV2 Putative uncharacterized protein
Rmet_0239	NeF		NeF		YP_582394.1	Q1LRV1 Putative uncharacterized protein
Rmet_0240	NF/NF		24.795		YP_582395.1	Q1LRV0 Nitrogen regulatory protein P-II (GlnB, GlnK)
Rmet_0241	NeF		NeF		YP_582396.1	Q1LRU9 Ammonium transporter
Rmet_0242	1600.5	76.5139	1823.94	71.514	YP_582397.1	Q1LRU8 Glutamate--cysteine ligase GshA
Rmet_0243	1671.7	57.5215	1896.3	101.865	YP_582398.1	Q1LRU7 Glutathione synthase
Rmet_0244	341.742	134.168	355.335	75.4796	YP_582399.1	Q1LRU6 PTS system fructose subfamily IIA component
Rmet_0245	187.417	119.934	386.424	85.8415	YP_582400.1	Q1LRU5 HPrNtr
Rmet_0246	423.362	110.357	505.83	42.0613	YP_582401.1	Q1LRU4 Phosphoenolpyruvate--protein phosphotransferase
Rmet_0247	NeF		NeF		YP_582402.1	Q1LRU3 BFD-like (2Fe-2S)-binding region
Rmet_0248	364.765	277.884	501.009	199.33	YP_582403.1	Q1LRU2 Bacterioferritin
Rmet_0249	250.575	101.879	249.496	73.5636	YP_582404.1	Q1LRU1 UBA/THIF-type NAD/FAD binding fold
Rmet_0250	1918.99	208.154	1864.2	356.786	YP_582405.1	Q1LRU0 Carboxyl-terminal protease
Rmet_0251	1132.35	120.616	1489.01	233.826	YP_582406.2	Q1LRT9 Phosphoglycerate mutase
Rmet_0252	541.272	48.4617	547.942	0.952452	YP_582407.1	Q1LRT8 Glutaredoxin, GrxC
Rmet_0253	NeF		NeF		YP_582408.1	Q1LRT7 RNA-directed DNA polymerase
Rmet_0254	2691.85	393.649	3379.92	165.529	YP_582409.1	Q1LRT6 Protein-export protein secB
Rmet_0255	200.937	65.2345	246.953	57.0106	YP_582410.1	Q1LRT5 Glycerol-3-phosphate dehydrogenase [NAD(P)+]
Rmet_0256	72.5025		NF/NF		YP_582411.1	Q1LRT4 Uncharacterized protein UPF0065
Rmet_0257	NF/NF		32.8941	2.6299	YP_582412.1	Q1LRT3 RNA methyltransferase TrmH, group 2
Rmet_0258	NeF		NeF		YP_582413.1	Q1LRT2 Amidophosphoribosyltransferases-like protein
Rmet_0259	122.225	10.0473	100.344	14.8294	YP_582414.1	Q1LRT1 Methyltransferase type 11
Rmet_0260	49.5735		18.4366		YP_582415.1	Q1LRT0 Putative transmembrane protein
Rmet_0261	2022.16	104.727	1032.85	209.298	YP_582416.1	Q1LRS9 Cytochrome c oxidase subunit 2
Rmet_0262	361.352	9.74381	88.3349	29.5245	YP_582417.1	Q1LRS8 Cytochrome c oxidase, subunit I
Rmet_0263	23.9196		NF/NF		YP_582418.1	Q1LRS7 Cytochrome c oxidase assembly protein CtaG/Cox11
Rmet_0264	NeF		NeF		YP_582419.1	Q1LRS6 Putative transmembrane protein
Rmet_0265	488.335	58.3604	124.119	21.4316	YP_582420.1	Q1LRS5 Cytochrome c oxidase, subunit III
Rmet_0266	NeF		NeF		YP_582421.1	Q1LRS4 Putative transmembrane protein
Rmet_0267	73	31.5454	41.137	9.84862	YP_582422.1	Q1LRS3 Putative uncharacterized protein
Rmet_0268	178.767	46.7991	70.7789	9.37345	YP_582423.1	Q1LRS2 Putative transmembrane protein
Rmet_0269	57.4612	28.6331	24.1734	0.754146	YP_582424.1	Q1LRS1 Cytochrome oxidase assembly
Rmet_0270	NeF		NeF		YP_582425.1	Q1LRS0 Protoheme IX farnesyltransferase
Rmet_0271	688.627	225.057	319.912	214.601	YP_582426.1	Q1LRR9 Electron transport protein SCO1/SenC
Rmet_0272	119.491		NF/NF		YP_582427.1	Q1LRR8 RNA polymerase sigma factor
Rmet_0273	790.156	60.0203	917.386	101.461	YP_582428.1	Q1LRR7 Pirin-like protein
Rmet_0274	663.902	349.999	295.085	90.029	YP_582429.1	Q1LRR6 Glycosyl transferase, family 3
Rmet_0275	556.49		97.0129		YP_582430.1	Q1LRR5 Nitrate transport ATP-binding subunits C and D
Rmet_0276	NeF		NeF		YP_582431.1	Q1LRR4 Nitrate transport permease
Rmet_0277	NF/NF		NF/NF		YP_582432.1	Q1LRR3 Putative nitrate transporter protein
Rmet_0278	NeF		NeF		YP_582433.1	Q1LRR2 Response regulator receiver (CheY-like) and ANTAR domain protein
Rmet_0279	3089.31	200.89	3422.73	213.922	YP_582434.1	Q1LRR1 Fumarylacetoacetate (FAA) hydrolase
Rmet_0280	1605.88	236.62	1249.5	2.31456	YP_582435.1	Q1LRR0 Maleylacetoacetate isomerase
Rmet_0281	558.748	303.673	328.005	101.347	YP_582436.1	Q1LRQ9 Signal recognition particle-docking protein FtsY
Rmet_0282	647.396	163.886	713.553	171.755	YP_582437.1	Q1LRQ8 Peptidase M16-like protein
Rmet_0283	814.331	6.75581	789.302	121.848	YP_582438.1	Q1LRQ7 Peptidase M16-like protein
Rmet_0284	456.346	230.264	614.551	60.8058	YP_582439.1	Q1LRQ6 Putative uncharacterized protein
Rmet_0285	2779.3	17.4374	2786.4	27.3645	YP_582440.1	Q1LRQ5 Phosphopantetheine adenylyltransferase
Rmet_0286	116.635	16.9224	149.938	40.9596	YP_582441.1	Q1LRQ4 4Fe-4S ferredoxin, iron-sulfur binding
Rmet_0287	269.052	15.6576	294.755	0.200631	YP_582442.1	Q1LRQ3 Peptidyl-tRNA hydrolase
Rmet_0288	7358.27	410.439	8076	519.555	YP_582443.1	Q1LRQ2 50S ribosomal protein L25
Rmet_0289	2304.37	183.22	2330.78	299.131	YP_582444.1	Q1LRQ1 Ribose-phosphate pyrophosphokinase
Rmet_0290	188.045	8.57253	213.369	77.604	YP_582445.1	Q1LRQ0 4-diphosphocytidyl-2-C-methyl-D-erythritol kinase
Rmet_0291	43.8975	26.3453	37.3113	2.0404	YP_582446.1	Q1LRP9 Outer-membrane lipoprotein lolB
Rmet_0292	756.853	35.2728	844.502	13.9202	YP_582447.1	Q1LRP8 Tetratricopeptide TPR_2
Rmet_0293	NeF		NeF		YP_582448.1	Q1LRP7 Formamidopyrimidine-DNA glycosylase
Rmet_0294	250.669	45.4747	216.291	55.5711	YP_582449.1	Q1LRP6 Putative uncharacterized protein
Rmet_0295	83.1818	65.5335	NF/NF		YP_582450.1	Q1LRP5 A/G-specific DNA-adenine glycosylase
Rmet_0296	17.1147		NF/NF		YP_582451.1	Q1LRP4 Peptidase S16, lon-like protein
Rmet_0297	676.843	273.323	448.983	77.6722	YP_582452.1	Q1LRP3 UPF0042 protein Rmet_0297
Rmet_0298	1061.5	264.303	483.912	40.822	YP_582453.1	Q1LRP2 Conserved hypothetical signal peptide protein
Rmet_0299	774.704	57.9292	913.518	71.8842	YP_582454.1	Q1LRP1 HPr kinase/phosphorylase
Rmet_0300	835.537	119.052	960.786	140.347	YP_582455.1	Q1LRP0 PTS IIA-like nitrogen-regulatory protein PtsN
Rmet_0301	NeF		NeF		YP_582456.1	Q1LRN9 Putative uncharacterized protein
Rmet_0302	1949.73	253.244	2495.12	565.795	YP_582457.1	Q1LRN8 SSU ribosomal protein S30P / sigma 54 modulation protein
Rmet_0303	329.624	28.9889	331.71	22.9958	YP_582458.1	Q1LRN7 Sigma-54 (RpoN)
Rmet_0304	810.67	95.2443	702.759	118.279	YP_582459.1	Q1LRN6 ABC transporter-related protein
Rmet_0305	641.745	35.6998	527.179	47.1393	YP_582460.1	Q1LRN5 OstA-like protein
Rmet_0306	146.854	18.2366	83.1503	11.4473	YP_582461.1	Q1LRN4 Putative uncharacterized protein
Rmet_0307	584.344	51.7874	699.706	60.5646	YP_582462.1	Q1LRN3 KpsF/GutQ family protein
Rmet_0308	62.8431	24.3635	67.8228		YP_582463.1	Q1LRN2 Sodium/hydrogen exchanger
Rmet_0309	NeF		NeF		YP_582464.1	Q1LRN1 Putative uncharacterized protein
Rmet_0310	3864.66	3.48773	3340.16	982.855	YP_582465.1	Q1LRN0 Peptidase C56, PfpI
Rmet_0311	604.472	122.638	730.265	116.338	YP_582466.1	Q1LRM9 Adenine phosphoribosyltransferase
Rmet_0312	198.957	10.3994	42.2364	3.66703	YP_582467.1	Q1LRM8 Na/Pi cotransporter II-related
Rmet_0313	814.413	60.8392	813.194	19.563	YP_582468.1	Q1LRM7 Excinuclease ABC subunit A
Rmet_0314	NeF		NeF		YP_582469.1	Q1LRM6 Major facilitator superfamily MFS_1
Rmet_0315	257.257	87.3658	309.027	9.98258	YP_582470.1	Q1LRM5 Single-stranded DNA-binding protein
Rmet_0316	NeF		NeF		YP_582471.1	Q1LRM4 Putative uncharacterized protein
Rmet_0317	NF/NF		NF/NF		YP_582472.1	Q1LRM3 Phage integrase
Rmet_0318					NPDB	Q1LRM2 Putative uncharacterized protein
Rmet_0319	NeF		NeF		YP_582474.1	Q58AJ2 Putative uncharacterized protein RMe0313 (Putative uncharacterized protein)
Rmet_0320	NF/NQ		NF/NF		YP_582475.1	Q5NUU5 Hypothetical general secretion pathway protein A (ATPase) (General secretion pathway protein)
Rmet_0321	NeF		NeF		YP_582476.1	Q5NUU4 ISRme2 transposase protein (Integrase, catalytic region) (Insertion element ISRme2 protein)
Rmet_0322	NeF		NeF		YP_582477.1	Q1L9I3 Putative uncharacterized protein
Rmet_0323					NPDB	Q1LRL7 Phage integrase
Rmet_0324	NeF		NeF		YP_582479.1	Q1LRL6 Putative uncharacterized protein
Rmet_0325	NeF		NeF		YP_582480.1	Q1LRL5 Putative uncharacterized protein
Rmet_0326	NeF		NeF		YP_582481.1	Q1LRL4 Putative uncharacterized protein
Rmet_0327	NeF		NeF		YP_582482.1	Q1LRL3 Major facilitator superfamily MFS_1
Rmet_0328	15.9281		144.616		YP_582483.1	Q1LRL2 NADPH-dependent FMN reductase
Rmet_0329	25.1225	8.92739	NF/NF		YP_582484.1	Q1LRL1 Arsenate reductase
Rmet_0330	NeF		NeF		YP_582485.1	Q1LRL0 Bile acid:sodium symporter
Rmet_0331	36.6743	1.46483	44.5613	0.170523	YP_582486.1	Q1LRK9 Protein tyrosine phosphatase
Rmet_0332	24.9825		NF/NF		YP_582487.1	Q1LRK8 Glyoxalase/bleomycin resistance protein/dioxygenase
Rmet_0333	36.2046		45.7179		YP_582488.1	Q1LRK7 Transcriptional regulator, ArsR family
Rmet_0334	85.1895	22.0044	23.3039		YP_582489.1	Q1LRK6 Methyltransferase type 11
Rmet_0335	NeF		NeF		YP_582490.1	Q1LRK5 Lytic transglycosylase, catalytic
Rmet_0336	115.168	0.115623	206.787	56.9287	YP_582491.1	Q1LRK4 Transcriptional regulator, IclR family
Rmet_0337	NF/NF		34.0201		YP_582492.1	Q1LRK3 Transcriptional regulator, IclR family
Rmet_0338	210.195	90.0108	72.0702	11.1753	YP_582493.1	Q1LRK2 Beta-lactamase-like protein
Rmet_0339	NeF		NeF		YP_582494.1	Q1LRK1 Monooxygenase, FAD-binding
Rmet_0340	NeF		NeF		YP_582495.1	Q1LRK0 Putative uncharacterized protein
Rmet_0341	NeF		NeF		YP_582496.1	Q1LRJ9 Major facilitator superfamily MFS_1
Rmet_0342	46.2042		230.885		YP_582497.1	Q1LRJ8 Extracellular solute-binding protein, family 3
Rmet_0343	183.754	71.0641	223.658	5.41033	YP_582498.1	Q1LRJ7 Transcriptional regulator, RpiR family
Rmet_0344	NeF		NeF		YP_582499.1	Q1LRJ6 Aminotransferase
Rmet_0345	NeF		NeF		YP_582500.1	Q1LRJ5 Putative uncharacterized protein
Rmet_0346	64.1162	27.8556	72.518	13.8457	YP_582501.1	Q1LRJ4 Aminotransferase
Rmet_0347	108.429	19.374	NF/NF		YP_582502.1	Q1LRJ3 RND efflux system, outer membrane lipoprotein, NodT
Rmet_0348	NeF		NeF		YP_582503.1	Q1LRJ2 ABC-type multidrug transport system permease component
Rmet_0349	384.139	229.986	351.72	154.066	YP_582504.1	Q1LRJ1 ABC transporter-related protein
Rmet_0350	37.123	33.2228	NF/NF		YP_582505.1	Q1LRJ0 Secretion protein HlyD
Rmet_0351	469.166		14.0007		YP_582506.1	Q1LRI9 Transcriptional regulator, TetR family
Rmet_0352	NeF		NeF		YP_582507.1	Q1LRI8 Carbohydrate-selective porin OprB
Rmet_0353	599.772	12.9501	646.758	32.8347	YP_582508.1	Q1LRI7 NADPH-dependent 7-cyano-7-deazaguanine reductase
Rmet_0354	663.774	38.3407	514.429	198.434	YP_582509.1	Q1LRI6 L-threonine ammonia-lyase
Rmet_0355	86.7826	13.3707	108.384	2.64307	YP_582510.1	Q1LRI5 HAD-superfamily hydrolase subfamily IIB
Rmet_0356	670.269	201.733	804.557	37.5659	YP_582511.1	Q1LRI4 Glycoside hydrolase 15-related
Rmet_0357	205.873	136.377	140.101	6.24486	YP_582512.1	Q1LRI3 Alpha,alpha-trehalose-phosphate synthase
Rmet_0358	64.0967	11.6797	319.689	287.408	YP_582513.1	Q1LRI2 Putative uncharacterized protein
Rmet_0359	124.939	28.1421	125.218	57.4546	YP_582514.1	Q1LRI1 Predicted sulfurylase large subunit, molybdopterin cytosine dinucleotide biosynthesis / predicted sulfurylase small subunit, molybdopterin cytosine dinucleotide biosynthesis
Rmet_0360	20.9838		26.5163		YP_582515.1	Q1LRI0 Carbon monoxide dehydrogenase subunit G
Rmet_0361	29.6375		NF/NF		YP_582516.1	Q1LRH9 VWA containing CoxE-like protein
Rmet_0362	NF/NF		NF/NF		YP_582517.1	Q1LRH8 ATPase associated with various cellular activities, AAA_5
Rmet_0363	NF/NF		240.695		YP_582518.1	Q1LRH7 Molybdopterin dehydrogenase, FAD-binding
Rmet_0364	75.6852		NF/NF		YP_582519.1	Q1LRH6 Xanthine dehydrogenase, molybdenum binding subunit apoprotein
Rmet_0365	NeF		NeF		YP_582520.1	Q1LRH5 (2Fe-2S)-binding
Rmet_0366	NeF		NeF		YP_582521.1	Q1LRH4 Putative membrane protein
Rmet_0367	960.385	72.3868	912.314	16.1544	YP_582522.1	Q1LRH3 FAD linked oxidase-like protein
Rmet_0368	225.395	108.114	245.133	60.2731	YP_582523.1	Q1LRH2 Histidine triad (HIT) protein
Rmet_0369	78.0214	35.8938	44.8676	3.77888	YP_582524.1	Q1LRH1 ABC transporter-like protein
Rmet_0370	483.619	47.2705	535.439	93.5031	YP_582525.1	Q1LRH0 Putative uncharacterized protein
Rmet_0371	591.657	92.574	436.176	98.4793	YP_582526.1	Q1LRG9 Ubiquinone/menaquinone biosynthesis methyltransferase ubiE
Rmet_0372	2603.47	70.262	1121.76	298.57	YP_582527.1	Q1LRG8 Import inner membrane translocase, subunit Tim44
Rmet_0373	677.995	311.83	509.958	204.513	YP_582528.1	Q1LRG7 Putative uncharacterized protein
Rmet_0374	349.206	59.6642	93.0887	5.08042	YP_582529.1	Q1LRG6 2-octaprenylphenol hydroxylase
Rmet_0375	NeF		NeF		YP_582530.1	Q1LRG5 Na+/solute symporter
Rmet_0376	309.669	91.3758	498.783	103.072	YP_582531.1	Q1LRG4 Putative uncharacterized protein
Rmet_0377	36.6117	20.8341	NF/NF		YP_582532.1	Q1LRG3 Putative uncharacterized protein
Rmet_0378	2205.62	0.625838	2199.7	109.369	YP_582533.1	Q1LRG2 Aspartyl-tRNA synthetase
Rmet_0379	20.5924		35.0311	7.45631	YP_582534.1	Q1LRG1 Putative transmembrane protein
Rmet_0380	26.3766		NF/NF		YP_582535.1	Q1LRG0 NUDIX hydrolase
Rmet_0381	NeF		NeF		YP_582536.1	Q1LRF9 Endonuclease/exonuclease/phosphatase
Rmet_0382	228.712	44.3891	290.494	64.5318	YP_582537.1	Q1LRF8 Molybdopterin-guanine dinucleotide biosynthesis protein B
Rmet_0383	123.765		NF/NF		YP_582538.1	Q1LRF7 Phospholipase D/Transphosphatidylase
Rmet_0384	136.842	12.5269	100.336	6.68414	YP_582539.1	Q1LRF6 Transcriptional regulator, TetR family
Rmet_0385	230.35	70.8549	382.82	128.608	YP_582540.1	Q1LRF5 Acyl-CoA dehydrogenase-like protein
Rmet_0386	250.636	30.824	453.347	81.3126	YP_582541.1	Q1LRF4 3-hydroxyacyl-CoA dehydrogenase
Rmet_0387	211.238	13.6451	312.11	39.4981	YP_582542.1	Q1LRF3 Thiolase
Rmet_0388	110.206		NF/NF		YP_582543.1	Q1LRF2 DegV
Rmet_0389	689.514	172.74	816.674	240.556	YP_582544.1	Q1LRF1 Enoyl-CoA hydratase
Rmet_0390	320.591	15.6421	378.581	88.9383	YP_582545.1	Q1LRF0 Thioesterase superfamily
Rmet_0391	38.2424	2.77252	NF/NF		YP_582546.1	Q1LRE9 ABC transporter-related protein
Rmet_0392	109.385	78.1784	35.8542		YP_582547.1	Q1LRE8 Twin-arginine translocation pathway signal
Rmet_0393	26.6355		NF/NF		YP_582548.1	Q1LRE7 ABC transporter-related protein
Rmet_0394	NeF		NeF		YP_582549.1	Q1LRE6 Binding-protein-dependent transport systems inner membrane component
Rmet_0395	NF/NF		23.8451		YP_582550.1	Q1LRE5 Transcriptional regulator, AsnC family
Rmet_0396	NeF		NeF		YP_582551.1	Q1LRE4 Cysteine dioxygenase type I
Rmet_0397	348.533	146.512	316.186		YP_582552.1	Q1LRE3 Transcriptional regulator, LysR family
Rmet_0398	343.275	15.1983	628.225	130.609	YP_582553.1	Q1LRE2 Glu/Leu/Phe/Val dehydrogenase
Rmet_0399	7546.73	620.607	7012.12	1528.54	YP_582554.1	Q1LRE1 Extracellular solute-binding protein, family 3
Rmet_0400	664.372	256.527	339.506	182.97	YP_582555.1	Q1LRE0 Amino acid ABC transporter, permease protein, 3-TM region, His/Glu/Gln/Arg/opine
Rmet_0401	463.019	143.941	227.748	168.117	YP_582556.1	Q1LRD9 Amino acid ABC transporter, permease protein, 3-TM region, His/Glu/Gln/Arg/opine
Rmet_0402	1597.05	92.8499	931.422	187.38	YP_582557.1	Q1LRD8 ABC transporter-related protein
Rmet_0403	NF/NF		66.8174		YP_582558.1	Q1LRD7 Glutamine amidotransferase, class-II
Rmet_0404	433.452	57.376	425.97	70.4547	YP_582559.1	Q1LRD6 Tartrate dehydrogenase
Rmet_0405	200.811	53.3018	309.453	8.66815	YP_582560.1	Q1LRD5 MOFRL
Rmet_0406	618.454	113.864	759.654	61.6364	YP_582561.1	Q1LRD4 Dihydroorotase
Rmet_0407	97.697	19.8354	67.6222	13.8436	YP_582562.1	Q1LRD3 Putative transmembrane protein
Rmet_0408	793.379	85.4656	964.155	182.592	YP_582563.1	Q1LRD2 OsmC-like protein
Rmet_0409	NeF		NeF		YP_582564.1	Q1LRD1 Putative uncharacterized protein
Rmet_0410	4678.6	683.379	5195.81	1005.68	YP_582565.1	Q1LRD0 50S ribosomal protein L13
Rmet_0411	7992.43	1045.86	8961.38	1056.87	YP_582566.1	Q1LRC9 30S ribosomal protein S9
Rmet_0412	105.585		276.514		YP_582567.1	Q1LRC8 Putative uncharacterized protein
Rmet_0413	202.118	45.88	160.787	59.895	YP_582568.1	Q1LRC7 Putative uncharacterized protein
Rmet_0414	324.047	45.447	702.007	73.7568	YP_582569.1	Q1LRC6 Putative iron-sulfur cluster insertion protein erpA
Rmet_0415	206.289	6.23855	162.709	50.2206	YP_582570.1	Q1LRC5 Anhydro-N-acetylmuramic acid kinase
Rmet_0416	224.054		NF/NF		YP_582571.1	Q1LRC4 Peptidase M23B
Rmet_0417	1278.94	140.339	1386.39	202.32	YP_582572.1	Q1LRC3 Tyrosyl-tRNA synthetase
Rmet_0418	257.319	179.464	148.041	70.3736	YP_582573.1	Q1LRC2 D-tyrosyl-tRNA(Tyr) deacylase
Rmet_0419	1199.14	263.763	1618.04	250.634	YP_582574.1	Q1LRC1 Phospholipid-binding protein, PBP family
Rmet_0420	657.859	76.3653	612.601	78.693	YP_582575.1	Q1LRC0 Phosphoglycerate mutase
Rmet_0421	5059.38	336.41	2155.76	296.778	YP_582576.1	Q1LRB9 Putative lipoprotein
Rmet_0422	4542.91	836.34	2044.28	1390.29	YP_582577.1	Q1LRB8 Putative uncharacterized protein
Rmet_0423	180.249	56.022	158.797	129.745	YP_582578.1	Q1LRB7 Holliday junction ATP-dependent DNA helicase ruvB
Rmet_0424	113.185	42.5369	154.793	6.5525	YP_582579.1	Q1LRB6 Holliday junction ATP-dependent DNA helicase ruvA
Rmet_0425	257.29	49.5477	334.365	18.559	YP_582580.1	Q1LRB5 Glycerophosphoryl diester phosphodiesterase
Rmet_0426	NeF		NeF		YP_582581.1	Q1LRB4 Crossover junction endodeoxyribonuclease ruvC
Rmet_0427	1581.69	48.0538	1805.05	81.9247	YP_582582.1	Q1LRB3 Bifunctional purine biosynthesis protein purH
Rmet_0428	75.3741	10.5546	86.2134	53.6121	YP_582583.1	Q1LRB2 DNA-binding protein Fis
Rmet_0429	262.882	130.704	131.367	78.6765	YP_582584.1	Q1LRB1 Dihydrouridine synthase TIM-barrel protein nifR3
Rmet_0430	210.894	59.8586	184.605	71.4723	YP_582585.1	Q1LRB0 Ubiquinone biosynthesis hydroxylase, UbiH/UbiF/VisC/COQ6 family
Rmet_0431	652.617	148.241	548.554	16.277	YP_582586.1	Q1LRA9 Putative uncharacterized protein
Rmet_0432	1120.75	159.778	1477	193.924	YP_582587.1	Q1LRA8 Aminopeptidase P. Metallo peptidase. MEROPS family M24B
Rmet_0433	189.749	46.1791	118.725	54.7098	YP_582588.1	Q1LRA7 Nucleotidyl transferase
Rmet_0434	NeF		NeF		YP_582589.1	Q1LRA6 AzlC-like protein
Rmet_0435	416.769	2.33792	464.928	45.3284	YP_582590.1	Q1LRA5 Aminoglycoside phosphotransferase
Rmet_0436	102.822	41.2686	70.5332	46.2497	YP_582591.1	Q1LRA4 LPS-assembly protein
Rmet_0437	1289.18	285.352	1237.55	237.216	YP_582592.1	Q1LRA3 Chaperone surA
Rmet_0438	274.003	125.621	201.109	27.0414	YP_582593.1	Q1LRA2 4-hydroxythreonine-4-phosphate dehydrogenase
Rmet_0439	358.1	45.2192	526.078	163.102	YP_582594.1	Q1LRA1 Dimethyladenosine transferase
Rmet_0440	807.32	28.5701	1105.19	84.1262	YP_582595.1	Q1LRA0 Tryptophanyl-tRNA synthetase
Rmet_0441	NeF		NeF		YP_582596.1	Q1LR99 Putative uncharacterized protein
Rmet_0442	829.392	321.584	916.18	387.86	YP_582597.1	Q1LR98 Glyoxalase I
Rmet_0443	NF/NF		427.201		YP_582598.1	Q1LR97 Putative uncharacterized protein
Rmet_0444	56.2815	7.07253	27.5326	0.66288	YP_582599.1	Q1LR96 Phospholipid/glycerol acyltransferase
Rmet_0445	330.954	22.8058	383.453	38.0127	YP_582600.1	Q1LR95 D-alpha,beta-D-heptose 1,7-bisphosphate phosphatase
Rmet_0446	1002.52	72.7679	986.508	55.812	YP_582601.1	Q1LR94 Glycyl-tRNA synthetase, beta subunit
Rmet_0447	96.175		NF/NF		YP_582602.1	Q1LR93 Conserved hypothetical signal peptide protein
Rmet_0448	468.569	65.966	610.252	78.7581	YP_582603.1	Q1LR92 Glycyl-tRNA synthetase alpha subunit
Rmet_0449	NeF		NeF		YP_582604.1	Q1LR91 Apolipoprotein N-acyltransferase
Rmet_0450	95.2544	23.0047	98.8325	58.0552	YP_582605.1	Q1LR90 CBS transporter-associated protein
Rmet_0451	568.005	256.572	627.843	224.758	YP_582606.1	B2AHA2 Putative metal-dependent hydrolase, COG0319; putative diacylglycerol kinase
Rmet_0452	491.265	19.2334	354.499	92.0256	YP_582607.1	Q1LR88 PhoH-like protein
Rmet_0453	169.542	58.0197	163.445	25.4257	YP_582608.1	Q1LR87 tRNA-i(6)A37 thiotransferase enzyme MiaB
Rmet_0454	131.227	8.79156	NF/NF		YP_582609.1	Q1LR86 Putative uncharacterized protein
Rmet_0455	NeF		NeF		YP_582610.1	Q1LR85 Cl-channel, voltage gated
Rmet_0456	174.881	15.0801	151.776	27.7448	YP_582611.1	Q1LR84 DEAD/DEAH box helicase-like protein
Rmet_0457	25.9513	7.85939	NF/NF		YP_582612.1	Q1LR83 Aminoglycoside phosphotransferase
Rmet_0458	1796.86	156.032	1886.31	381.753	YP_582613.1	Q1LR82 UspA
Rmet_0459	39.4836	27.1803	39.8248		YP_582614.1	Q1LR81 Two component transcriptional regulator, LuxR family
Rmet_0460	90.9199	9.88611	65.6508	5.46208	YP_582615.1	Q1LR80 Pyridoxal-dependent decarboxylase
Rmet_0461	NeF		NeF		YP_582616.1	Q1LR79 Putative uncharacterized protein
Rmet_0462	137.333	49.9782	NF/NF		YP_582617.1	Q1LR78 Major facilitator superfamily MFS_1
Rmet_0463	NeF		NeF		YP_582618.1	Q1LR77 Putative membrane protein
Rmet_0464	115.288	97.8629	NF/NF		YP_582619.1	Q1LR76 Sensor protein
Rmet_0465	111.222	16.3439	91.6166	9.60689	YP_582620.1	Q1LR75 Two component transcriptional regulator, winged helix family
Rmet_0466	2314.52	38.5627	2172.31	259.92	YP_582621.1	Q1LR74 Protein recA
Rmet_0467	NeF		NeF		YP_582622.1	Q1LR73 Regulatory protein RecX
Rmet_0468	146.211	54.972	271.101	185.281	YP_582623.1	Q1LR72 Putative uncharacterized protein
Rmet_0469	6215.23	538.839	6696.54	582.229	YP_582624.1	Q1LR71 Succinyl-CoA synthetase (ADP-forming) beta subunit
Rmet_0470	4374.6	208.581	4949.18	107.68	YP_582625.1	Q1LR70 Succinyl-CoA ligase [ADP-forming] subunit alpha
Rmet_0471	217.774	66.8054	146.486	32.5488	YP_582626.1	Q1LR69 Integral membrane protein TerC
Rmet_0472	NeF		NeF		YP_582627.1	Q1LR68 Fimbrial protein pilin
Rmet_0473	NeF		NeF		YP_582628.1	Q1LR67 Fimbrial protein pilin
Rmet_0474	NeF		NeF		YP_582629.1	Q1LR66 O-antigen polymerase
Rmet_0475	NeF		NeF		YP_582630.1	Q1LR65 Proline-rich region
Rmet_0476	NeF		NeF		YP_582631.1	Q1LR64 Putative uncharacterized protein
Rmet_0477	NeF		NeF		YP_582632.1	Q1LR63 Putative uncharacterized protein
Rmet_0478	NeF		NeF		YP_582633.1	Q1LR62 Molybdenum cofactor biosynthesis enzyme-like protein
Rmet_0479					NPDB	Q1LR61 ABC transporter, ATP-binding protein-related protein
Rmet_0480	NF/NF		69.6688	18.9617	YP_582635.1	Q9RBF5 Ralstonia eutropha insertion sequence IS1090
Rmet_0481					NPDB	Q1LR59 Putative uncharacterized protein
Rmet_0482	NeF		NeF		YP_582637.1	Q1LR58 Putative uncharacterized protein
Rmet_0483	NeF		NeF		YP_582638.1	Q1LHY9 Integrase, catalytic region
Rmet_0484	NeF		NeF		YP_582639.1	Q1LHZ0 IstB-like ATP-binding protein
Rmet_0485					NPDB	Q1LR55 Putative uncharacterized protein
Rmet_0486	160.432	24.9092	306.999	40.7435	YP_582641.1	Q1LR54 Molybdenum cofactor biosynthesis protein C
Rmet_0487	181.935		NF/NF		YP_582642.1	Q1LR53 Peptidase M48, Ste24p
Rmet_0488	101.341	7.22507	129.95	5.56767	YP_582643.1	Q1LR52 Putative uncharacterized protein
Rmet_0489	NeF		NeF		YP_582644.1	Q1LR51 Alpha/beta hydrolase fold
Rmet_0490	254.272	31.0606	327.441	34.4413	YP_582645.1	Q1LR50 Putative uncharacterized protein
Rmet_0491	483.523	77.6971	100.897	12.8434	YP_582646.1	Q1LR49 Lipopolysaccharide heptosyltransferase II
Rmet_0492	2188.93	500.248	2431.52	420.429	YP_582647.1	Q1LR48 Putative uncharacterized protein
Rmet_0493	1338.69	124.295	1665.17	117.104	YP_582648.1	Q1LR47 Branched chain amino acid aminotransferase / branched chain amino acid: 2-keto-4-methylthiobutyrate aminotransferase
Rmet_0494	155.28	43.5317	NF/NF		YP_582649.1	Q1LR46 SNF2-related
Rmet_0495	NF/NF		NF/NF		YP_582650.1	Q1LR45 Amidase
Rmet_0496	NeF		NeF		YP_582651.1	Q1LR44 Major facilitator superfamily MFS_1
Rmet_0497	NeF		NeF		YP_582652.1	Q1LR43 AzlC-like protein
Rmet_0498	NeF		NeF		YP_582653.1	Q1LR42 Branched-chain amino acid transport
Rmet_0499	NeF		NeF		YP_582654.1	Q1LR41 Transcriptional regulator, LuxR family
Rmet_0500	14.1639		NF/NF		YP_582655.1	Q1LR40 Regulatory protein, LuxR
Rmet_0501	2628.7	70.9493	2805.6	40.0161	YP_582656.1	Q1LR39 Phosphoglycerate kinase
Rmet_0502	1992.74	24.9671	2234.91	100.12	YP_582657.1	Q1LR38 Pyruvate kinase
Rmet_0503	3706.3	119.389	3908.81	68.9355	YP_582658.1	Q1LR37 Fructose-bisphosphate aldolase
Rmet_0504	1812.7	175.463	2202.4	74.5731	YP_582659.1	Q1LR36 Phosphoribosylaminoimidazole-succinocarboxamide synthase
Rmet_0505	877.514	2.71105	1039.07	92.2439	YP_582660.1	Q1LR35 Phosphoribosylaminoimidazole carboxylase, catalytic subunit
Rmet_0506	1317.01	270.363	1474.16	520.454	YP_582661.1	Q1LR34 Phosphoribosylaminoimidazole carboxylase
Rmet_0507	242.876	89.7033	358.374	42.9717	YP_582662.1	Q1LR33 Translation factor SUA5
Rmet_0508	43.4644	15.7154	146.817	184.117	YP_582663.1	Q1LR32 D-Ala-D-Ala carboxypeptidase PBP3. Serine peptidase. MEROPS family S13
Rmet_0509	NeF		NeF		YP_582664.1	Q1LR31 Transmembrane pair
Rmet_0510	NeF		NeF		YP_582665.1	Q1LR30 Transcriptional regulator, LysR family
Rmet_0511	NF/NF		89.2014		YP_582666.1	Q1LR29 RND efflux system, outer membrane lipoprotein, NodT
Rmet_0512	NeF		NeF		YP_582667.1	Q1LR28 Acriflavin resistance protein
Rmet_0513	110.621	17.1202	NF/NF		YP_582668.1	Q1LR27 Acriflavin resistance protein
Rmet_0514	39.6119	12.2452	53.068	14.9974	YP_582669.1	Q1LR26 Secretion protein HlyD
Rmet_0515	114.216	59.0419	115.529	21.7379	YP_582670.1	Q1LR25 Two component transcriptional regulator, winged helix family
Rmet_0516	56.7189	24.4317	NF/NF		YP_582671.1	Q1LR24 Sensor protein
Rmet_0517	18.6804		NF/NF		YP_582672.1	Q1LR23 UPF0078 membrane protein Rmet_0517
Rmet_0518	285.112	113.336	408.107	138.489	YP_582673.1	Q1LR22 Putative uncharacterized protein
Rmet_0519	138.075	106.446	178.196	89.3772	YP_582674.1	Q1LR21 Tyrosine recombinase XerD subunit
Rmet_0520	29.5773	9.04023	37.3378	29.3539	YP_582675.1	Q1LR20 Methylated-DNA--protein-cysteine methyltransferase
Rmet_0521	13245.8	1633.34	11923.4	2904.53	YP_582676.1	Q1LR19 Uncharacterized protein UPF0065
Rmet_0522	105.459	32.1991	174.01	58.2276	YP_582677.1	Q1LR18 Putative uncharacterized protein
Rmet_0523	NeF		NeF		YP_582678.1	Q1LR17 Auxin Efflux Carrier
Rmet_0524	NeF		NeF		YP_582679.1	Q1LR16 4Fe-4S cluster binding
Rmet_0525	207.179	46.4856	741.853	132.494	YP_582680.1	Q1LR15 Putative uncharacterized protein
Rmet_0526	101.464	0.18487	67.1835	1.3376	YP_582681.1	Q1LR14 Cell wall hydrolase/autolysin
Rmet_0527	NeF		NeF		YP_582682.1	Q1LR13 Putative lipoprotein transmembrane
Rmet_0528	285.384	215.23	303.359	91.2412	YP_582683.1	Q1LR12 Transcriptional regulator, LysR family
Rmet_0529	64.7371		54.9614	29.5589	YP_582684.1	Q1LR11 Methyltransferase type 11
Rmet_0530	15.9464		NF/NF		YP_582685.1	Q1LR10 Transcriptional regulator, XRE family
Rmet_0531	320.758	25.6157	459.984	48.5712	YP_582686.1	Q1LR09 Short-chain dehydrogenase/reductase SDR
Rmet_0532	1594.19	251.252	1728.56	247.638	YP_582687.1	Q1LR08 Adenylate kinase
Rmet_0533	400.476	98.1516	539.922	144.965	YP_582688.1	Q1LR07 3-deoxy-D-manno-octulosonate cytidylyltransferase
Rmet_0534	714.106	54.4841	793.733	41.2963	YP_582689.1	Q1LR06 UPF0434 protein Rmet_0534
Rmet_0535	299.125	93.3448	140.25	98.9479	YP_582690.1	Q1LR05 Tetraacyldisaccharide 4'-kinase
Rmet_0536	82.1022	33.9984	28.1593	3.98449	YP_582691.1	Q1LR04 Biopolymer transport protein ExbD/TolR
Rmet_0537	206.513	104.373	57.5991	12.6607	YP_582692.1	Q1LR03 MotA/TolQ/ExbB proton channel
Rmet_0538	107.2	11.8497	82.4833	39.537	YP_582693.1	Q1LR02 Exodeoxyribonuclease 7 large subunit
Rmet_0539	6580.73	182.571	7550.64	5.4858	YP_582694.1	Q1LR01 Superoxide dismutase
Rmet_0540	81.2088	23.5779	49.698	10.0358	YP_582695.1	Q1LR00 Transcriptional regulator, TetR family
Rmet_0541	NeF		NeF		YP_582696.1	Q1LQZ9 Major facilitator superfamily MFS_1
Rmet_0542	59.1667	30.1083	220.882		YP_582697.1	Q1LQZ8 Putative uncharacterized protein
Rmet_0543	NeF		NeF		YP_582698.1	Q1LQZ7 Ferredoxin
Rmet_0544	NF/NF		74.0955		YP_582699.1	Q1LQZ6 Transcriptional regulator, TetR family
Rmet_0545	197.325	35.3767	197.31	23.6627	YP_582700.1	Q1LQZ5 Alcohol dehydrogenase, zinc-binding
Rmet_0546	54.7996	24.4093	NF/NF		YP_582701.1	Q1LQZ4 3-hydroxybutyrate dehydrogenase
Rmet_0547	NeF		NeF		YP_582702.1	Q1LQZ3 Citrate transporter
Rmet_0548	NeF		NeF		YP_582703.1	Q1LQZ2 Sigma54 specific transcriptional regulator, Fis family
Rmet_0549	NeF		NeF		YP_582704.1	Q1LQZ1 Mg2+ transporter protein, CorA-like protein
Rmet_0550	55.0897		182.175		YP_582705.1	Q1LQZ0 Putative uncharacterized protein
Rmet_0551	NeF		NeF		YP_582706.1	Q1LQY9 Hyicolysin. Metallo peptidase. MEROPS family M30
Rmet_0552	NeF		NeF		YP_582707.1	Q1LQY8 Transcriptional regulator of molybdate metabolism, LysR family
Rmet_0553	77.0742	48.6124	35.7505		YP_582708.1	Q1LQY7 NADH dehydrogenase (Ubiquinone), 24 kDa subunit
Rmet_0554	NF/NF		83.3519		YP_582709.1	Q1LQY6 Respiratory-chain NADH dehydrogenase domain, 51 kDa subunit
Rmet_0555	NeF		NeF		YP_582710.1	Q1LQY5 Formate dehydrogenase, alpha subunit
Rmet_0556	NeF		NeF		YP_582711.1	Q1LQY4 Formate dehydrogenase family accessory protein FdhD
Rmet_0557	NF/NF		203.633	247.161	YP_582712.1	Q1LQY3 Formate dehydrogenase delta subunit
Rmet_0558	191.434	159.948	NF/NF		YP_582713.1	Q1LQY2 Glycosyl transferase, family 51
Rmet_0559	53.8742	1.6205	63.5912	32.9881	YP_582714.1	Q1LQY1 Malate/L-lactate dehydrogenase
Rmet_0560	NeF		NeF		YP_582715.1	Q1LQY0 Anion transporter
Rmet_0561	158.953	26.543	132.201	92.0339	YP_582716.1	Q1LQX9 Protein tyrosine/serine phosphatase
Rmet_0562	338.423	27.5743	371.921	69.11	YP_582717.1	Q1LQX8 Acetate kinase
Rmet_0563	81.1522	9.32315	114.094	47.1818	YP_582718.1	Q1LQX7 Phosphate acetyl/butaryl transferase
Rmet_0564	92.1062	19.9271	101.553	36.9765	YP_582719.1	Q1LQX6 Putative uncharacterized protein
Rmet_0565	383.372	10.3546	220.811	6.53145	YP_582720.1	Q1LQX5 Enoyl-[acyl-carrier-protein] reductase (NADH)
Rmet_0566	NeF		NeF		YP_582721.1	Q1LQX4 Putative uncharacterized protein
Rmet_0567	170.528	9.90186	119.623	28.262	YP_582722.1	Q1LQX3 Transcriptional regulator, ModE family
Rmet_0568	NeF		NeF		YP_582723.1	Q1LQX2 Adenylate cyclase
Rmet_0569	20.4419		NF/NF		YP_582724.1	Q1LQX1 ABC transporter-related protein
Rmet_0570	NeF		NeF		YP_582725.1	Q1LQX0 Molybdate ABC transporter, permease protein
Rmet_0571	95.755	54.3834	NF/NF		YP_582726.1	Q1LQW9 Molybdenum ABC transporter, periplasmic molybdate-binding protein
Rmet_0572	NeF		NeF		YP_582727.1	Q1LQW8 5'-Nucleotidase-like protein
Rmet_0573	127.147		NF/NF		YP_582728.1	Q1LQW7 Sel1
Rmet_0574	NF/NF		NF/NF		YP_582729.1	Q1LQW6 Fimbrial biogenesis outer membrane usher protein
Rmet_0575	NeF		NeF		YP_582730.1	Q1LQW5 Pili assembly chaperone
Rmet_0576	NeF		NeF		YP_582731.1	Q1LQW4 Fimbrial protein
Rmet_0577	14.3446		NF/NF		YP_582732.1	Q1LQW3 Nucleoside 2-deoxyribosyltransferase
Rmet_0578	53.985	25.0454	38.3394	3.0366	YP_582733.1	Q1LQW2 Putative uncharacterized protein
Rmet_0579	100.041	68.3524	19.6424		YP_582734.1	Q1LQW1 Mammalian cell entry related
Rmet_0580	NeF		NeF		YP_582735.1	Q1LQW0 Paraquat-inducible protein A
Rmet_0581	NeF		NeF		YP_582736.1	Q1LQV9 Paraquat-inducible protein A
Rmet_0582	100.068		NF/NF		YP_582737.1	Q1LQV8 Putative uncharacterized protein
Rmet_0583	NeF		NeF		YP_582738.1	Q1LQV7 CBS domain containing membrane protein
Rmet_0584	NeF		NeF		YP_582739.1	Q1LQV6 Cl-channel, voltage gated
Rmet_0585	NeF		NeF		YP_582740.1	Q1LQV5 Amidinotransferase
Rmet_0586	NeF		NeF		YP_582741.1	Q1LQV4 Ornithine cyclodeaminase
Rmet_0587	220.327	10.9501	182.555	59.913	YP_582742.1	Q1LQV3 Excisionase/Xis, DNA-binding
Rmet_0588	50.1328	19.3781	NF/NF		YP_582743.1	Q1LQV2 Two component, sigma54 specific, transcriptional regulator, Fis family
Rmet_0589	NeF		NeF		YP_582744.1	Q1LQV1 Sensor protein
Rmet_0590	NeF		NeF		YP_582745.1	Q1LQV0 Sodium:dicarboxylate symporter
Rmet_0591	NeF		NeF		YP_582746.1	Q1LQU9 Diguanylate cyclase/phosphodiesterase (GGDEF & EAL domains) with PAS/PAC sensor(S)
Rmet_0592	26.415	9.02329	NF/NF		YP_582747.1	Q1LQU8 Putative uncharacterized protein
Rmet_0593	NeF		NeF		YP_582748.1	Q1LQU7 Putative uncharacterized protein
Rmet_0594	54.683	13.8896	57.3897	4.94307	YP_582749.1	Q1LQU6 (2Fe-2S)-binding
Rmet_0595	127.225	27.9078	158.701	105.46	YP_582750.1	Q1LQU5 Twin-arginine translocation pathway signal
Rmet_0596	33.323		NF/NF		YP_582751.1	Q1LQU4 Putative transmembrane transcriptional regulator (Anti-sigma factor)
Rmet_0597	NF/NF		NF/NF		YP_582752.1	Q1LQU3 RNA polymerase sigma factor
Rmet_0598	NF/NF		76.3005	13.0735	YP_582753.1	Q1LQU2 Twin-arginine translocation pathway signal
Rmet_0599	NeF		NeF		YP_582754.1	Q1LQU1 Cytochrome c oxidase subunit 2
Rmet_0600	NF/NF		37.1758		YP_582755.1	Q1LQU0 Acriflavin resistance protein
Rmet_0601	NeF		NeF		YP_582756.1	Q1LQT9 Secretion protein HlyD
Rmet_0602	97.5382	11.7915	62.2874	20.1121	YP_582757.1	Q1LQT8 Putative uncharacterized protein
Rmet_0603	37.5061		NF/NF		YP_582758.1	Q1LQT7 Putative integral membrane sensor protein
Rmet_0604	39.7696		54.678		YP_582759.1	Q1LQT6 Esterase/lipase-like protein
Rmet_0605	NF/NF		75.105		YP_582760.1	Q1LQT5 Patatin
Rmet_0606	NeF		NeF		YP_582761.1	Q1LQT4 Sulphate transporter
Rmet_0607	197.959	51.785	211.616	71.5609	YP_582762.1	Q1LQT3 Hydroxymethylglutaryl-CoA lyase
Rmet_0608	307.055	55.4246	242.9	11.9794	YP_582763.1	Q1LQT2 3-methylcrotonoyl-CoA carboxylase, alpha subunit
Rmet_0609	162.713	33.005	225.234	26.5144	YP_582764.1	Q1LQT1 Carboxyl transferase
Rmet_0610	NF/NF		187.127	58.0364	YP_582765.1	Q1LQT0 AMP-dependent synthetase and ligase
Rmet_0611	12.8616	0.841001	NF/NF		YP_582766.1	Q1LQS9 Transcriptional regulator, TetR family
Rmet_0612	NeF		NeF		YP_582767.1	Q1LQS8 Two component transcriptional regulator, LuxR family
Rmet_0613	NeF		NeF		YP_582768.1	Q1LQS7 Periplasmic sensor signal transduction histidine kinase
Rmet_0614	NeF		NeF		YP_582769.1	Q1LQS6 Outer membrane autotransporter barrel
Rmet_0615	6176.24	1455.86	7399.02	853.022	YP_582770.1	Q1LQS5 10 kDa chaperonin
Rmet_0616	11088.5	873.503	13097.4	183.169	YP_582771.1	Q1LQS4 60 kDa chaperonin
Rmet_0617	NeF		NeF		YP_582772.1	Q1LQS3 Putative uncharacterized protein
Rmet_0618	NeF		NeF		YP_582773.1	Q1LQS2 ATPase AAA-2
Rmet_0619	NF/NF		29.6777	11.2276	YP_582774.1	Q1LQS1 Putative uncharacterized protein
Rmet_0620	NeF		NeF		YP_582775.1	Q1LQS0 OmpA/MotB
Rmet_0621	193.907	146.135	48.7272		YP_582776.1	Q1LQR9 Putative uncharacterized protein
Rmet_0622	NeF		NeF		YP_582777.1	Q1LQR8 Putative uncharacterized protein
Rmet_0623	NeF		NeF		YP_582778.2	Q1LQR7 Putative uncharacterized protein
Rmet_0624	NF/NF		49.1452		YP_582779.1	Q1LQR6 Putative uncharacterized protein
Rmet_0625	NeF		NeF		YP_582780.1	Q1LQR5 Uncharacterised conserved protein UCP028301
Rmet_0626	NF/NF		601.982	211.315	YP_582781.1	Q1LQR4 Rhs element Vgr protein
Rmet_0627	NeF		NeF		YP_582782.1	Q1LQR3 Phospholipase D/Transphosphatidylase
Rmet_0628	NeF		NeF		YP_582783.1	Q1LQR2 Sel1
Rmet_0629	NeF		NeF		YP_582784.1	Q1LQR1 Putative phospholipase protein
Rmet_0630	NeF		NeF		YP_582785.1	Q1LQR0 Sel1
Rmet_0631	130.791		NF/NF		YP_582786.1	Q1LQQ9 PaaR
Rmet_0632	NeF		NeF		YP_582787.1	Q1LQQ8 Putative uncharacterized protein
Rmet_0633	NeF		NeF		YP_582788.1	Q1LQQ7 ImcF-related
Rmet_0634	147.08	92.5899	281.724	94.2302	YP_582789.1	Q1LQQ6 ImpA-like protein
Rmet_0635	529.349	101.147	136.486		YP_582790.1	Q1LQQ5 Putative uncharacterized protein
Rmet_0636	NeF		NeF		YP_582791.1	Q1LQQ4 Putative uncharacterized protein
Rmet_0637	NeF		NeF		YP_582792.1	Q1LQQ3 Putative uncharacterized protein
Rmet_0638	209.411	63.4548	239.596	92.3584	YP_582793.1	Q1LQQ2 Metallophosphoesterase
Rmet_0639	70.3433		NF/NF		YP_582794.1	Q1LQQ1 Type II secretion system protein
Rmet_0640	NeF		NeF		YP_582795.1	Q1LQQ0 Type II secretion system protein
Rmet_0641	NeF		NeF		YP_582796.1	Q1LQP9 Type II secretion system protein E
Rmet_0642	NF/NF		390.276		YP_582797.1	Q1LQP8 Response regulator receiver domain protein (CheY-like)
Rmet_0643	NeF		NeF		YP_582798.1	Q1LQP7 TadE-like protein
Rmet_0644	NeF		NeF		YP_582799.1	Q1LQP6 TadE-like protein
Rmet_0645	NeF		NeF		YP_582800.1	Q1LQP5 Putative uncharacterized protein
Rmet_0646	NeF		NeF		YP_582801.1	Q1LQP4 Putative lipoprotein
Rmet_0647	NeF		NeF		YP_582802.1	Q1LQP3 Type II and III secretion system protein
Rmet_0648	NeF		NeF		YP_582803.1	Q1LQP2 Flp pilus assembly CpaB
Rmet_0649	NF/NF		NF/NF		YP_582804.1	Q1LQP1 ATPase
Rmet_0650	NeF		NeF		YP_582805.1	Q1LQP0 Peptidase A24A, prepilin type IV
Rmet_0651	NeF		NeF		YP_582806.1	Q1LQN9 Flp/Fap pilin component
Rmet_0652	NeF		NeF		YP_582807.1	Q1LQN8 Flp/Fap pilin component
Rmet_0653	NeF		NeF		YP_582808.1	Q1LQN7 Flp/Fap pilin component
Rmet_0654	NeF		NeF		YP_582809.1	Q1LQN6 Putative membrane protein
Rmet_0655	NeF		NeF		YP_582810.1	Q1LQN5 Putative membrane protein
Rmet_0656	NeF		NeF		YP_582811.1	Q1LQN4 Glycosyl transferase, family 2
Rmet_0657	NeF		NeF		YP_582812.1	Q1LQN3 Putative membrane protein
Rmet_0658	NeF		NeF		YP_582813.1	Q1LQN2 GtrA-like protein
Rmet_0659	NeF		NeF		YP_582814.1	Q1LQN1 Sigma54 specific transcriptional regulator, Fis family
Rmet_0660	207.91	178.113	115.559	16.1804	YP_582815.1	Q1LQN0 Transcriptional regulator, LysR family
Rmet_0661	NeF		NeF		YP_582816.1	Q1LQM9 Major facilitator superfamily MFS_1
Rmet_0662	NeF		NeF		YP_582817.1	Q1LQM8 Putative integral membrane sensor protein
Rmet_0663	38.785	1.85746	29.6894		YP_582818.1	Q1LQM7 Putative uncharacterized protein
Rmet_0664	37.7505	13.0707	NF/NF		YP_582819.1	Q1LQM6 Putative uncharacterized protein
Rmet_0665	411.517	87.1347	160.308	49.1279	YP_582820.1	Q1LQM5 LemA
Rmet_0666	9.04512		57.3273		YP_582821.1	Q1LQM4 Dihydrodipicolinate synthase
Rmet_0667	1428.07	32.8624	1373.74	362.089	YP_582822.1	Q1LQM3 Glutamate-1-semialdehyde 2,1-aminomutase
Rmet_0668	174.648	76.5801	95.9777	48.3254	YP_582823.1	Q1LQM2 Rubredoxin
Rmet_0669	142.383	11.7976	38.6124	19.3062	YP_582824.1	Q1LQM1 Response regulator receiver domain protein (CheY-like)
Rmet_0670	179.033	131.658	158.391	143.908	YP_582825.1	Q1LQM0 Response regulator receiver domain protein (CheY-like)
Rmet_0671	66.0953	5.41757	NF/NF		YP_582826.1	Q1LQL9 CheW protein
Rmet_0672	734.162	198.16	134.914	37.6066	YP_582827.1	Q1LQL8 Methyl-accepting chemotaxis sensory transducer
Rmet_0673	1035.51	280.126	110.351		YP_582828.1	Q1LQL7 CheA signal transduction histidine kinases
Rmet_0674	75.5376		NF/NF		YP_582829.1	Q1LQL6 Major facilitator superfamily MFS_1
Rmet_0675	165.438	30.774	180.233	28.4962	YP_582830.1	Q1LQL5 Short-chain dehydrogenase/reductase SDR
Rmet_0676	NeF		NeF		YP_582831.1	Q1LQL4 Putative uncharacterized protein
Rmet_0677	565.737	92.4015	406.795	24.2331	YP_582832.1	Q1LQL3 Aldehyde dehydrogenase
Rmet_0678	1800.9	46.184	1990.76	159.791	YP_582833.1	Q1LQL2 Inorganic pyrophosphatase
Rmet_0679	NeF		NeF		YP_582834.1	Q1LQL1 Putative uncharacterized protein
Rmet_0680	344.326	71.0279	360.34	9.93269	YP_582835.1	Q1LQL0 NAD+ synthetase
Rmet_0681	1088.53	514.091	1250.59	588.98	YP_582836.1	Q1LQK9 Nitrogen regulatory protein P-II
Rmet_0682	50.79		NF/NF		YP_582837.1	Q1LQK8 Putative uncharacterized protein
Rmet_0683	284.931	20.4148	217.67	13.1734	YP_582838.1	Q1LQK7 Smr protein/MutS2
Rmet_0684	2158.78	59.295	2509.46	248.342	YP_582839.1	Q1LQK6 Thioredoxin reductase
Rmet_0685	350.5	165.688	85.6015	25.1773	YP_582840.1	Q1LQK5 DNA translocase FtsK
Rmet_0686	337.655	28.3548	224.122	27.5228	YP_582841.1	Q1LQK4 Outer-membrane lipoprotein carrier protein
Rmet_0687	205.046	72.9872	117.633	73.4011	YP_582842.1	Q1LQK3 Putative lipoprotein transmembrane
Rmet_0688	NeF		NeF		YP_582843.1	Q1LQK2 Putative uncharacterized protein
Rmet_0689	NF/NF		NF/NF		YP_582844.1	Q1LQK1 Putative uncharacterized protein
Rmet_0690	933.876	92.9015	462.201	189.411	YP_582845.1	Q1LQK0 Extracellular solute-binding protein, family 3
Rmet_0691	NeF		NeF		YP_582846.1	Q1LQJ9 Amino acid ABC transporter, permease protein, 3-TM region, His/Glu/Gln/Arg/opine
Rmet_0692	NeF		NeF		YP_582847.1	Q1LQJ8 Amino acid ABC transporter, permease protein, 3-TM region, His/Glu/Gln/Arg/opine
Rmet_0693	22.2364		NF/NF		YP_582848.1	Q1LQJ7 ABC transporter-related protein
Rmet_0694	198.235	12.3431	162.931	19.6626	YP_582849.1	Q1LQJ6 Recombination protein MgsA
Rmet_0695	1215.42	19.9836	1352.27	193.618	YP_582850.1	Q1LQJ5 Seryl-tRNA synthetase
Rmet_0696	NeF		NeF		YP_582851.1	Q1LQJ4 Putative uncharacterized protein
Rmet_0697	3637.51	493.602	698.698	90.8818	YP_582852.1	Q1LQJ3 Pilus assembly protein major pilin PilA
Rmet_0698	45.4868	18.4257	NF/NF		YP_582853.1	Q1LQJ2 Putative uncharacterized protein
Rmet_0699	NeF		NeF		YP_582854.1	Q1LQJ1 Transcriptional regulator, LysR family
Rmet_0700	NF/NF		100.541	3.53333	YP_582855.1	Q1LQJ0 FAD dependent oxidoreductase
Rmet_0701	523.873	48.1036	225.185	31.9193	YP_582856.1	Q1LQI9 Extracellular solute-binding protein, family 3
Rmet_0702	54.0976	2.0546	139.446	89.2871	YP_582857.1	Q1LQI8 Putative uncharacterized protein
Rmet_0703	765.753	74.3492	953.388	38.6156	YP_582858.1	Q1LQI7 Cyanophycin synthetase
Rmet_0704	406.899	11.2521	316.797	29.6345	YP_582859.1	Q1LQI6 Cyanophycin synthetase
Rmet_0705	138.806	39.7637	90.6568	6.667	YP_582860.1	Q1LQI5 ABC transporter-related protein
Rmet_0706	318.509	10.6909	218.322	25.9133	YP_582861.1	Q1LQI4 Putative uncharacterized protein
Rmet_0707	116.63	24.0608	160.143	34.3013	YP_582862.1	Q1LQI3 Putative uncharacterized protein
Rmet_0708	NeF		NeF		YP_582863.1	Q1LQI2 Putative uncharacterized protein
Rmet_0709	NF/NF		NF/NF		YP_582864.1	Q1LQI1 Putative uncharacterized protein
Rmet_0710	231.195	36.2615	249.242	58.0373	YP_582865.1	Q1LQI0 Phosphoglycolate phosphatase
Rmet_0711	598.506	11.2804	540.257	155.511	YP_582866.1	Q1LQH9 3-demethylubiquinone-9 3-methyltransferase
Rmet_0712	4696.37	607.764	2665.66	501.291	YP_582867.1	Q1LQH8 OmpA/MotB
Rmet_0713	1471.27	4.37724	1411.02	159.338	YP_582868.1	Q1LQH7 DNA gyrase subunit A
Rmet_0714	5979.19	706.116	5361	895.341	YP_582869.1	Q1LQH6 Putative signal peptide protein
Rmet_0715	1030.27	26.2258	1283.1	33.7139	YP_582870.1	Q1LQH5 Phosphoserine aminotransferase
Rmet_0716	553.652	86.8256	670.204	169.946	YP_582871.1	Q1LQH4 Prephenate dehydratase / chorismate mutase
Rmet_0717	724.706	221.876	830.615	183.941	YP_582872.1	Q1LQH3 Aminotransferase
Rmet_0718	637.952	38.7583	734.141	125.189	YP_582873.1	Q1LQH2 Prephenate dehydrogenase
Rmet_0719	699.578	2.33531	796.056	16.953	YP_582874.1	Q1LQH1 3-phosphoshikimate 1-carboxyvinyltransferase
Rmet_0720	NeF		NeF		YP_582875.1	Q1LQH0 Membrane protein-like protein
Rmet_0721	480.318	23.1326	404.135	103.879	YP_582876.1	Q1LQG9 Cytidylate kinase
Rmet_0722	9092.52	1103.8	10029.7	819.752	YP_582877.1	Q1LQG8 SSU ribosomal protein S1P
Rmet_0723	665.422	67.2635	851.538	87.6437	YP_582878.1	Q1LQG7 Integration host factor, beta subunit
Rmet_0724	NeF		NeF		YP_582879.1	Q1LQG6 Putative transmembrane protein
Rmet_0725	230.825	24.6373	162.228	29.1056	YP_582880.1	Q1LQG5 Tetratricopeptide TPR_2
Rmet_0726	699.108	30.0602	675.433	42.5647	YP_582881.1	Q1LQG4 UDP-glucose/GDP-mannose dehydrogenase
Rmet_0727	410.293	46.6299	407.698	175.885	YP_582882.1	Q1LQG3 D-alpha,beta-D-heptose 7-phosphate 1-kinase
Rmet_0728	686.707	185.348	791.722	201.033	YP_582883.1	Q1LQG2 ADP-L-glycero-D-manno-heptose-6-epimerase
Rmet_0729	NeF		NeF		YP_582884.1	Q1LQG1 Helix-hairpin-helix DNA-binding, class 1
Rmet_0730	71.1626	9.67897	NF/NF		YP_582885.1	Q1LQG0 Uracil-xanthine permease
Rmet_0731	1096.98	33.2699	1413.68	66.0919	YP_582886.1	Q1LQF9 Cysteine synthase
Rmet_0732	263.794	37.8724	281.3	43.3452	YP_582887.1	Q1LQF8 Lytic murein transglycosylase B
Rmet_0733	285.292	117.84	415.76	73.7306	YP_582888.1	Q1LQF7 Histone deacetylase superfamily
Rmet_0734	279.188	25.3138	138.894	4.45275	YP_582889.1	Q1LQF6 Methionine import ATP-binding protein metN
Rmet_0735	73.8003	28.862	153.308		YP_582890.1	Q1LQF5 Binding-protein-dependent transport systems inner membrane component
Rmet_0736	1435.33	10.6241	736.095	152.06	YP_582891.1	Q1LQF4 Lipoprotein YaeC
Rmet_0737	6052.2	161.924	6793.35	21.1158	YP_582892.1	Q1LQF3 Electron transfer flavoprotein beta-subunit
Rmet_0738	4542.22	333.25	5651.78	402.466	YP_582893.1	Q1LQF2 Electron transfer flavoprotein, alpha subunit
Rmet_0739	1149.43	322.419	1100.81	211.978	YP_582894.1	Q1LQF1 Acyl-CoA dehydrogenase-like protein
Rmet_0740	35.0903	13.6262	NF/NF		YP_582895.1	Q1LQF0 D-amino acid dehydrogenase small subunit
Rmet_0741	105.631	61.97	105.9	8.43914	YP_582896.1	Q1LQE9 Transcriptional regulator, AsnC family
Rmet_0742	NF/NF		NF/NF		YP_582897.1	Q1LQE8 Radical SAM
Rmet_0743	NeF		NeF		YP_582898.1	Q1LQE7 Transcriptional regulator, LysR family
Rmet_0744	118.004	43.6327	NF/NF		YP_582899.1	Q1LQE6 TM2
Rmet_0745	NeF		NeF		YP_582900.1	Q1LQE5 Putative uncharacterized protein
Rmet_0746	NeF		NeF		YP_582901.1	Q1LQE4 Putative uncharacterized protein
Rmet_0747	31.0665		19.8808		YP_582902.1	Q1LQE3 Putative membrane-bound dehydrogenase oxidoreductase protein
Rmet_0748	4463.06	13.1998	5526.12	10.6329	YP_582903.1	Q1LQE2 SSU ribosomal protein S16P
Rmet_0749	426.045	138.632	407.785	147.279	YP_582904.1	Q1LQE1 Ribosome maturation factor rimM
Rmet_0750	169.032	9.65129	163.08	54.1216	YP_582905.1	Q1LQE0 tRNA (guanine-N(1)-)-methyltransferase
Rmet_0751	7867.07	1218.01	8151.71	1364.62	YP_582906.1	Q1LQD9 50S ribosomal protein L19
Rmet_0752	99.9635	4.99719	59.8388	29.1179	YP_582907.1	Q1LQD8 NUDIX hydrolase
Rmet_0753	314.153	33.7015	362.801	5.25414	YP_582908.1	Q1LQD7 UPF0176 protein Rmet_0753
Rmet_0754	250.253	61.3213	118.869	63.6584	YP_582909.1	Q1LQD6 DNA polymerase III, alpha subunit
Rmet_0755	111.063	15.442	79.2062	46.6347	YP_582910.1	Q1LQD5 Glycosyl transferase, group 1
Rmet_0756	65.186	18.0568	155.014	8.27879	YP_582911.1	Q1LQD4 Glycosyl transferase, family 2
Rmet_0757	277.625	106.005	89.8861	33.8024	YP_582912.1	Q1LQD3 Lipid A export ATP-binding/permease protein msbA
Rmet_0758	659.989	124.824	736.982	132.85	YP_582913.1	Q1LQD2 Uncharacterised peroxidase-related
Rmet_0759	NeF		NeF		YP_582914.1	Q1LQD1 Putative lipoprotein
Rmet_0760	NeF		NeF		YP_582915.1	Q1LQD0 Amidohydrolase 3
Rmet_0761	566.155	282.205	NF/NF		YP_582916.1	Q1LQC9 Phosphonate C-P lyase system, PhnL
Rmet_0762	30.6884		NF/NF		YP_582917.1	Q1LQC8 Phosphonate C-P lyase system, PhnK
Rmet_0763	NF/NF		49.4439		YP_582918.1	Q1LQC7 Phosphonate metabolism PhnJ
Rmet_0764	NF/NF		NF/NF		YP_582919.1	Q1LQC6 Phosphonate metabolism
Rmet_0765	NeF		NeF		YP_582920.1	Q1LQC5 Phosphonate metabolism
Rmet_0766	124.86		NF/NF		YP_582921.1	Q1LQC4 Phosphonate metabolism PhnG
Rmet_0767	150.305		18.669		YP_582922.1	Q1LQC3 Transcriptional regulator, GntR family
Rmet_0768	53.4156		NF/NF		YP_582923.1	Q1LQC2 Amidohydrolase 3
Rmet_0769	NeF		NeF		YP_582924.1	Q1LQC1 Putative uncharacterized protein
Rmet_0770	NeF		NeF		YP_582925.1	Q1LQC0 Phosphonate metabolism, 1,5-bisphosphokinase (PRPP-forming) PhnN
Rmet_0771	NeF		NeF		YP_582926.1	Q1LQB9 GCN5-related N-acetyltransferase
Rmet_0772	NeF		NeF		YP_582927.1	Q1LQB8 Putative uncharacterized protein
Rmet_0773	NeF		NeF		YP_582928.1	Q1LQB7 Phosphonate uptake transporter
Rmet_0774	374.392	90.0353	621.512		YP_582929.1	Q1LQB6 Phosphonate-binding periplasmic protein
Rmet_0775	NeF		NeF		YP_582930.1	Q1LQB5 Phosphonates import ATP-binding protein phnC 1
Rmet_0776	NeF		NeF		YP_582931.1	Q1LQB4 Major facilitator superfamily MFS_1
Rmet_0777	NeF		NeF		YP_582932.1	Q1LQB3 Drug resistance transporter Bcr/CflA subfamily
Rmet_0778	453.749	10.4481	431.583	29.4586	YP_582933.1	Q1LQB2 RNAse G
Rmet_0779	86.9443	22.4355	125.389	46.2353	YP_582934.1	Q1LQB1 Maf-like protein Rmet_0779
Rmet_0780	50.5506	25.262	39.7612	4.29232	YP_582935.1	Q1LQB0 UPF0247 protein Rmet_0780
Rmet_0781	2248.33	155.208	2474.39	172.6	YP_582936.1	Q1LQA9 Iojap-related protein
Rmet_0782	101.644	9.21924	73.48	14.661	YP_582937.1	Q1LQA8 Nicotinate-nucleotide adenylyltransferase
Rmet_0783	201.679	47.3965	280.022	134.656	YP_582938.1	Q1LQA7 Coproporphyrinogen oxidase
Rmet_0784	1006.84	56.3167	1066.63	42.1154	YP_582939.1	Q1LQA6 Phosphoribosylamine--glycine ligase
Rmet_0785	1284.03	21.8034	1501.09	150.386	YP_582940.1	Q1LQA5 UPF0082 protein Rmet_0785
Rmet_0786	322.838	38.902	321.063	25.4323	YP_582941.1	Q1LQA4 Putative uncharacterized protein
Rmet_0787	NeF		NeF		YP_582942.1	Q1LQA3 Putative uncharacterized protein
Rmet_0788	401.025	120.898	508.449	185.239	YP_582943.1	Q1LQA2 Uracil phosphoribosyltransferase
Rmet_0789	250.235	27.4012	130.123	52.5877	YP_582944.2	Q1LQA1 Uncharacterized protein UPF0065
Rmet_0790	NeF		NeF		YP_582945.2	Q1LQA0 Putative uncharacterized protein
Rmet_0791	77.9799	54.5294	NF/NF		YP_582946.1	Q1LQ99 Short-chain dehydrogenase/reductase SDR
Rmet_0792	22.209		NF/NF		YP_582947.1	Q1LQ98 Methylglyoxal synthase
Rmet_0793	NeF		NeF		YP_582948.1	Q1LQ97 Putative uncharacterized protein
Rmet_0794	1216.98	197.284	766.601	132.119	YP_582949.1	Q1LQ96 Basic membrane lipoprotein
Rmet_0795	NeF		NeF		YP_582950.1	Q1LQ95 Inner-membrane translocator
Rmet_0796	81.5582	39.8065	96.4898		YP_582951.1	Q1LQ94 Inner-membrane translocator
Rmet_0797	99.9751		NF/NF		YP_582952.1	Q1LQ93 ABC transporter-related protein
Rmet_0798	114.341	11.2898	131.905	22.6416	YP_582953.1	Q1LQ92 Pirin-like protein
Rmet_0799	269.984	151.433	261.778	22.3296	YP_582954.1	Q1LQ91 Binding-protein-dependent transport systems inner membrane component
Rmet_0800	844.245	279.388	842.844	109.744	YP_582955.1	Q1LQ90 Substrate-binding region of ABC-type glycine betaine transport system
Rmet_0801	268.149	120.881	124.522	92.3559	YP_582956.1	Q1LQ89 Binding-protein-dependent transport systems inner membrane component
Rmet_0802	1374.39	7.55964	985.607	212.008	YP_582957.1	Q1LQ88 Glycine betaine/L-proline transport ATP binding subunit
Rmet_0803	NeF		NeF		YP_582958.1	Q1LQ87 Putative uncharacterized protein
Rmet_0804	NeF		NeF		YP_582959.1	Q1LQ86 SPFH domain, Band 7 family protein
Rmet_0805	NeF		NeF		YP_582960.1	Q1LQ85 Putative uncharacterized protein
Rmet_0806	NeF		NeF		YP_582961.1	Q1LQ84 Putative uncharacterized protein
Rmet_0807	106.765	76.333	235.877	16.7425	YP_582962.1	Q1LQ83 Class II aldolase/adducin-like protein
Rmet_0808	925.172	465.509	1159.93	613.926	YP_582963.1	Q1LQ82 4-oxalocrotonate tautomerase family enzyme
Rmet_0809	320.199	78.7373	319.6	41.759	YP_582964.1	Q1LQ81 L-threonine aldolase
Rmet_0810	336.97	6.94577	184.722	14.6083	YP_582965.1	Q1LQ80 NUDIX hydrolase
Rmet_0811	735.1	197.999	844.209	145.695	YP_582966.1	Q1LQ79 SirA-like protein
Rmet_0812	1653.12	226.976	2025.82	176.909	YP_582967.1	Q1LQ78 Peptidyl-prolyl cis-trans isomerase
Rmet_0813	45.839	4.50386	89.5207	34.2221	YP_582968.1	Q1LQ77 YaeQ
Rmet_0814	NeF		NeF		YP_582969.1	Q1LQ76 Putative uncharacterized protein
Rmet_0815	NF/NF		NF/NF		YP_582970.1	Q1LQ75 YceI
Rmet_0816	NeF		NeF		YP_582971.1	Q1LQ74 Putative transmembrane protein
Rmet_0817	349.316	24.3327	417.311	20.3239	YP_582972.1	Q1LQ73 Putative uncharacterized protein
Rmet_0818	759.289	82.1307	965.579	33.6831	YP_582973.1	Q1LQ72 Glutaminyl-tRNA synthetase
Rmet_0819	163.807	23.069	242.132	11.7079	YP_582974.1	Q1LQ71 L-carnitine dehydratase/bile acid-inducible protein F
Rmet_0820	NeF		NeF		YP_582975.1	Q1LQ70 Pyridoxamine 5'-phosphate oxidase-related, FMN-binding
Rmet_0821	176.73	59.1374	265.252	92.7958	YP_582976.1	Q1LQ69 Phenazine biosynthesis PhzC/PhzF protein
Rmet_0822	896.853	16.6173	900.591	209.999	YP_582977.1	Q1LQ68 Gamma-glutamyltransferase 2. Threonine peptidase. MEROPS family T03
Rmet_0823	265.34	22.4321	131.686	12.7801	YP_582978.1	Q1LQ67 Uncharacterized protein UPF0065
Rmet_0824	NeF		NeF		YP_582979.1	Q1LQ66 Transcriptional regulator, LysR family
Rmet_0825	506.538	86.3003	186.935	145.146	YP_582980.1	Q1LQ65 Putative uncharacterized protein
Rmet_0826	154.86		NF/NF		YP_582981.1	Q1LQ64 Putative uncharacterized protein
Rmet_0827	NeF		NeF		YP_582982.1	Q1LQ63 Sodium/hydrogen exchanger
Rmet_0828	414.431	60.407	339.616	27.631	YP_582983.1	Q1LQ62 Uncharacterized protein UPF0065
Rmet_0829	53.2711		NF/NF		YP_582984.1	Q1LQ61 Putative transmembrane protein
Rmet_0830	87.4868	34.7568	148.112	99.0559	YP_582985.1	Q1LQ60 L-carnitine dehydratase/bile acid-inducible protein F
Rmet_0831	1793.86	283.621	1623.97	247.869	YP_582986.1	Q1LQ59 Alanyl-tRNA synthetase
Rmet_0832	33.6181		NF/NF		YP_582987.1	Q1LQ58 Aldehyde dehydrogenase
Rmet_0833	410.791	78.6374	305.331	19.7069	YP_582988.1	Q1LQ57 Transcriptional regulator, GntR family
Rmet_0834	29.9267		16.6432		YP_582989.1	Q1LQ56 D-glucarate dehydratase
Rmet_0835	NeF		NeF		YP_582990.1	Q1LQ55 Uncharacterized protein UPF0065
Rmet_0836	NeF		NeF		YP_582991.1	Q1LQ54 Putative uncharacterized protein
Rmet_0837	19.6921		NF/NF		YP_582992.1	Q1LQ53 TonB-dependent siderophore receptor
Rmet_0838	57.8087		67.3378	19.7266	YP_582993.1	Q1LQ52 PKHD-type hydroxylase Rmet_0838
Rmet_0839	NeF		NeF		YP_582994.1	Q1LQ51 FMN-dependent alpha-hydroxy acid dehydrogenase
Rmet_0840	NeF		NeF		YP_582995.1	Q1LQ50 Transcriptional regulator, IclR family
Rmet_0841	125.756		NF/NF		YP_582996.1	Q1LQ49 Enoyl-CoA hydratase/isomerase
Rmet_0842	NeF		NeF		YP_582997.1	Q1LQ48 CoA-binding
Rmet_0843	NeF		NeF		YP_582998.1	Q1LQ47 Uncharacterized protein UPF0065
Rmet_0844	NeF		NeF		YP_582999.1	Q1LQ46 Acyl-CoA dehydrogenase-like protein
Rmet_0845	NeF		NeF		YP_583000.1	Q1LQ45 Acyl-CoA dehydrogenase-like protein
Rmet_0846	NeF		NeF		YP_583001.1	Q1LQ44 Putative uncharacterized protein
Rmet_0847	246.96	21.3363	264.763	36.0242	YP_583002.1	Q1LQ43 Putative uncharacterized protein
Rmet_0848	266.13	40.8332	221.123	19.7786	YP_583003.1	Q1LQ42 Putative uncharacterized protein
Rmet_0849	1166.18		NF/NF		YP_583004.1	Q1LQ41 17 kDa surface antigen
Rmet_0850	111.728	13.8022	106.518	52.8213	YP_583005.1	Q1LQ40 Coproporphyrinogen III oxidase, anaerobic
Rmet_0851	140.526	1.9957	140.001	14.8365	YP_583006.1	Q1LQ39 Nucleoside-triphosphatase
Rmet_0852	332.866	107.316	482.267	187.369	YP_583007.1	Q1LQ38 Ribonuclease PH
Rmet_0853	345.801	5.22619	261.368	42.2265	YP_583008.1	Q1LQ37 Protein serine/threonine phosphatases
Rmet_0854	173.262	1.56857	69.4526	4.35843	YP_583009.1	Q1LQ36 Serine/threonine protein kinase
Rmet_0855	1082.23	28.9896	1153.48	27.336	YP_583010.1	Q1LQ35 Putative uncharacterized protein
Rmet_0856	702.145	45.8916	757.13	8.16714	YP_583011.1	Q1LQ34 Guanylate kinase
Rmet_0857	508.276	287.123	569.451	365.094	YP_583012.1	B3R3N5 DNA-DIRECTED RNA POLYMERASE (OMEGA CHAIN) PROTEIN
Rmet_0858	314.288	33.5046	273.75	96.5865	YP_583013.1	Q1LQ32 (P)ppGpp synthetase I (GTP pyrophosphokinase), SpoT/RelA
Rmet_0859	156.296	4.2542	150.902	39.9036	YP_583014.1	Q1LQ31 Transcription elongation factor
Rmet_0860	NeF		NeF		YP_583015.1	Q1LQ30 Putative uncharacterized protein
Rmet_0861	NeF		NeF		YP_583016.1	Q1LQ29 Putative uncharacterized protein
Rmet_0862	62.6517	18.2175	81.4875	16.447	YP_583017.1	Q1LQ28 Putative uncharacterized protein
Rmet_0863	NeF		NeF		YP_583018.1	Q1LQ27 Putative uncharacterized protein
Rmet_0864	135.212		156.422		YP_583019.1	Q1LQ26 Putative uncharacterized protein
Rmet_0865	NeF		NeF		YP_583020.1	Q1LQ25 Putative uncharacterized protein
Rmet_0866	281.057	65.0056	113.81	5.46365	YP_583021.1	Q1LQ24 Aspartyl/Asparaginyl beta-hydroxylase
Rmet_0867	439.901	20.685	267.565	70.7847	YP_583022.1	Q1LQ23 Diguanylate cyclase (GGDEF domain)
Rmet_0868	71.1475	7.98819	90.5594		YP_583023.1	Q1LQ22 Transcriptional regulator, GntR family
Rmet_0869	257.024	55.1788	184.708	114.95	YP_583024.1	Q1LQ21 FAD dependent oxidoreductase
Rmet_0870	129.254	0.193563	293.908	64.7411	YP_583025.1	Q1LQ20 Putative uncharacterized protein
Rmet_0871	264.083	15.5052	222.014	2.30793	YP_583026.1	Q1LQ19 Putative uncharacterized protein
Rmet_0872	NeF		NeF		YP_583027.1	Q1LQ18 Putative uncharacterized protein
Rmet_0873	NeF		NeF		YP_583028.1	Q1LQ17 Response regulator receiver domain protein (CheY-like)
Rmet_0874	NeF		NeF		YP_583029.1	Q1LQ16 Putative uncharacterized protein
Rmet_0875	808.943	170.422	872.979	239.191	YP_583030.1	Q1LQ15 D-fructose 1,6-bisphosphatase
Rmet_0876	946.003	17.9675	1055.1	130.808	YP_583031.1	Q1LQ14 Peptidase M1, alanyl aminopeptidase
Rmet_0877	80.9083	27.644	42.379		YP_583032.1	Q1LQ13 Putative lipoprotein transmembrane
Rmet_0878	2938.1	114.725	3462.68	588.916	YP_583033.1	Q1LQ12 Malic enzyme, NAD-binding
Rmet_0879	NeF		NeF		YP_583034.1	Q1LQ11 Putative uncharacterized protein
Rmet_0880	NeF		NeF		YP_583035.1	Q1LQ10 Porin, gram-negative type
Rmet_0881	133.001	29.2476	125.268	26.5224	YP_583036.1	Q1LQ09 Putative uncharacterized protein
Rmet_0882	450.232		236.539	102.874	YP_583037.1	Q1LQ08 Polysaccharide deacetylase
Rmet_0883	NeF		NeF		YP_583038.1	Q1LQ07 Uracil-xanthine permease
Rmet_0884	63.9158	13.8846	NF/NF		YP_583039.1	Q1LQ06 Transcriptional regulator, GntR family
Rmet_0885	NF/NF		79.6158	53.6078	YP_583040.1	Q1LQ05 Transthyretin
Rmet_0886	NeF		NeF		YP_583041.1	Q1LQ04 Putative uncharacterized protein
Rmet_0887	NeF		NeF		YP_583042.1	Q1LQ03 Putative uncharacterized protein
Rmet_0888	58.5672		NF/NF		YP_583043.1	Q1LQ02 Fatty acid desaturase
Rmet_0889	247.023	25.0081	264.668	11.7574	YP_583044.1	Q1LQ01 Guanine deaminase
Rmet_0890	263.942	74.5783	245.414	59.407	YP_583045.1	Q1LQ00 Adenosine deaminase
Rmet_0891	NeF		NeF		YP_583046.1	Q1LPZ9 Molybdenum cofactor sulfurylase
Rmet_0892	NeF		NeF		YP_583047.1	Q1LPZ8 Xanthine oxidase
Rmet_0893	NF/NF		171.238	1.62358	YP_583048.1	Q1LPZ7 Molybdopterin dehydrogenase, FAD-binding
Rmet_0894	113.201	12.031	71.2457	13.3556	YP_583049.1	Q1LPZ6 Transcriptional regulator, LysR family
Rmet_0895	498.042	95.6415	169.61	15.845	YP_583050.1	Q1LPZ5 Putative signal peptide protein
Rmet_0896	146.607	31.8474	126.87	31.2363	YP_583051.1	Q1LPZ4 Transcriptional regulator of molybdate metabolism, LysR family
Rmet_0897	NF/NF		NF/NF		YP_583052.1	Q1LPZ3 Putative transmembrane protein
Rmet_0898	235.467	184.436	60.3061	36.516	YP_583053.1	Q1LPZ2 Putative uncharacterized protein
Rmet_0899	73.7009	6.75521	108.513	8.42162	YP_583054.1	Q1LPZ1 Globin
Rmet_0900	NF/NF		71.2839		YP_583055.1	Q1LPZ0 Putative uncharacterized protein
Rmet_0901	305.361	156.507	268.15	121.913	YP_583056.1	Q1LPY9 Transcriptional regulator, TetR family
Rmet_0902	91.4741	24.6935	127.011	17.3525	YP_583057.1	Q1LPY8 Putative uncharacterized protein
Rmet_0903	NeF		NeF		YP_583058.1	Q1LPY7 Diacylglycerol kinase
Rmet_0904	NeF		NeF		YP_583059.1	Q1LPY6 Glycosyl transferase, group 1
Rmet_0905	27.2227		NF/NF		YP_583060.1	Q1LPY5 Metallophosphoesterase
Rmet_0906	NeF		NeF		YP_583061.1	Q1LPY4 PGAP1-like protein
Rmet_0907	69.9055	63.4414	NF/NF		YP_583062.1	Q1LPY3 RDD domain protein
Rmet_0908	86.483	13.9656	94.1876	12.6277	YP_583063.1	Q1LPY2 Putative transmembrane protein
Rmet_0909	NF/NF		NF/NF		YP_583064.1	Q1LPY1 Putative transmembrane protein
Rmet_0910	148.823	3.02412	150.162	49.1135	YP_583065.1	Q1LPY0 Sigma-24 (FecI-like)
Rmet_0911	1955.11	156.587	1986.59	118.427	YP_583066.1	Q1LPX9 Acetolactate synthase, large subunit
Rmet_0912	1727.15	97.3818	1962.16	137.945	YP_583067.1	Q1LPX8 Acetolactate synthase, small subunit
Rmet_0913	5504.92	775.405	6085.89	1021.69	YP_583068.1	Q1LPX7 Ketol-acid reductoisomerase
Rmet_0914	NeF		NeF		YP_583069.1	Q1LPX6 Putative uncharacterized protein
Rmet_0915	NeF		NeF		YP_583070.1	Q1LPX5 Phosphatidylserine decarboxylase proenzyme
Rmet_0916	NF/NF		NF/NF		YP_583071.1	Q1LPX4 CDP-diacylglycerol--serine O-phosphatidyltransferase
Rmet_0917	1498.72	204.172	1300.74	259.574	YP_583072.1	Q1LPX3 Peptidoglycan-binding LysM
Rmet_0918	1351.21	140.982	1044.99	20.8409	YP_583073.1	Q1LPX2 2-isopropylmalate synthase
Rmet_0919	55.2317	2.80288	131.726	76.3427	YP_583074.1	Q1LPX1 Putative lipoprotein transmembrane
Rmet_0920	629.644	110.702	380.887	46.3529	YP_583075.1	Q1LPX0 Putative transporter signal peptide protein
Rmet_0921	4846.66	392.253	5281.56	472.939	YP_583076.1	Q1LPW9 30S ribosomal protein S15
Rmet_0922					NPDB	Q1LPW8 Putative uncharacterized protein
Rmet_0923	5723.18	722.212	6699.38	1258.02	YP_583078.1	Q1LPW7 Polyribonucleotide nucleotidyltransferase
Rmet_0924	1243.77	292.758	1329.46	361.285	YP_583079.1	Q1LPW6 Alcohol dehydrogenase, zinc-binding
Rmet_0925	1624.5	44.8835	1783.94	170.014	YP_583080.1	Q1LPW5 Triosephosphate isomerase
Rmet_0926	NeF		NeF		YP_583081.1	Q1LPW4 Protein translocase subunit secG
Rmet_0927	610.471		177.539	94.295	YP_583082.1	Q1LPW3 NADH-quinone oxidoreductase subunit
Rmet_0928	1401.61	152.386	1003.67	180.794	YP_583083.1	Q1LPW2 NADH-quinone oxidoreductase subunit B
Rmet_0929	2229.39	331.758	1961.02	306.555	YP_583084.1	Q1LPW1 NADH-quinone oxidoreductase subunit C
Rmet_0930	2736.74	195.797	2366.52	28.4209	YP_583085.1	Q1LPW0 NADH dehydrogenase I, D subunit
Rmet_0931	2366.62	546.036	2547.1	19.0731	YP_583086.1	Q1LPV9 NADH-quinone oxidoreductase, E subunit
Rmet_0932	1994.56	28.8375	1524.62	43.4968	YP_583087.1	Q1LPV8 NADH-quinone oxidoreductase, F subunit
Rmet_0933	3569.61	380.575	3350.26	8.54798	YP_583088.1	Q1LPV7 NADH-quinone oxidoreductase
Rmet_0934	537.513	100.08	200.257	126.787	YP_583089.1	Q1LPV6 NADH-quinone oxidoreductase subunit H
Rmet_0935	920.267	320.121	583.59	266.761	YP_583090.1	Q1LPV5 NADH-quinone oxidoreductase subunit I
Rmet_0936	432.741		NF/NF		YP_583091.1	Q1LPV4 NADH-ubiquinone/plastoquinone oxidoreductase, chain 6
Rmet_0937	NeF		NeF		YP_583092.1	Q1LPV3 NADH-ubiquinone oxidoreductase, chain 4L
Rmet_0938	954.614	124.165	306.753	178.086	YP_583093.1	Q1LPV2 Proton-translocating NADH-quinone oxidoreductase, chain L
Rmet_0939	235.338	92.9467	145.02	14.7575	YP_583094.1	Q1LPV1 Proton-translocating NADH-quinone oxidoreductase, chain M
Rmet_0940	576.859	157.406	273.919	73.1903	YP_583095.1	Q1LPV0 Proton-translocating NADH-quinone oxidoreductase, chain N
Rmet_0941	NeF		NeF		YP_583096.1	Q1LPU9 Putative transmembrane protein
Rmet_0942	386.7	127.171	367.689	13.7675	YP_583097.1	Q1LPU8 NUDIX hydrolase
Rmet_0943	NeF		NeF		YP_583098.1	Q1LPU7 Putative uncharacterized protein
Rmet_0944	1171.86	135.873	1599.79	159.174	YP_583099.1	Q1LPU6 Acyl-CoA dehydrogenase-like protein
Rmet_0945	1524.89	246.09	1893.4	324.983	YP_583100.1	Q1LPU5 Acyl-CoA dehydrogenase-like protein
Rmet_0946	108.896	8.21437	148.501	48.9518	YP_583101.1	Q1LPU4 MaoC-like dehydratase
Rmet_0947	136.575	2.94726	155.069	5.01417	YP_583102.1	Q1LPU3 MaoC-like dehydratase
Rmet_0948	578.91	51.7878	174.209	61.3244	YP_583103.1	Q1LPU2 Ubiquinol oxidase, subunit II
Rmet_0949	423.275	24.4845	80.7783	12.2422	YP_583104.1	Q1LPU1 Cytochrome c oxidase, subunit I
Rmet_0950	NeF		NeF		YP_583105.1	Q1LPU0 Cytochrome c oxidase, subunit III
Rmet_0951	NeF		NeF		YP_583106.1	Q1LPT9 Cytochrome C oxidase subunit IV
Rmet_0952	137.329	48.8473	98.8097		YP_583107.1	Q1LPT8 Twin-arginine translocation pathway signal
Rmet_0953	NeF		NeF		YP_583108.1	Q1LPT7 Inner-membrane translocator
Rmet_0954	NeF		NeF		YP_583109.1	Q1LPT6 Inner-membrane translocator
Rmet_0955	NeF		NeF		YP_583110.1	Q1LPT5 ABC transporter-related protein
Rmet_0956	171.133	205.356	307.606	259.92	YP_583111.1	Q1LPT4 ABC transporter-related protein
Rmet_0957	NeF		NeF		YP_583112.1	Q1LPT3 Urease accessory protein ureD
Rmet_0958	251.794		240.428	31.515	YP_583113.1	Q1LPT2 Urease subunit gamma
Rmet_0959	NeF		NeF		YP_583114.1	Q1LPT1 HupE/UreJ protein
Rmet_0960	NF/NF		57.9319	6.03317	YP_583115.1	Q1LPT0 Urease subunit beta
Rmet_0961	NF/NF		NF/NF		YP_583116.1	Q1LPS9 Urease
Rmet_0962	78.0985	3.02548	102.181	5.28623	YP_583117.1	Q1LPS8 UreE urease accessory-like protein
Rmet_0963	NQ/NF		NF/NF		YP_583118.1	Q1LPS7 Urease accessory protein ureF
Rmet_0964	178.614	42.1444	184.017	8.92005	YP_583119.1	Q1LPS6 Urease accessory protein ureG
Rmet_0965	1904.89	199.237	2028.5	111.818	YP_583120.1	Q1LPS5 Transcriptional regulator, XRE family
Rmet_0966	NeF		NeF		YP_583121.1	Q1LPS4 Putative uncharacterized protein
Rmet_0967	1151.34	130.656	1217.44	95.5126	YP_583122.1	Q1LPS3 Glutathione S-transferase-like protein
Rmet_0968	701.613	117.617	896.35	157.391	YP_583123.1	Q1LPS2 Acyl-CoA dehydrogenase-like protein
Rmet_0969	136.087	5.83742	148.141	54.0431	YP_583124.1	Q1LPS1 Transcriptional regulator, LysR family
Rmet_0970	820.367	86.4075	422.079	75.6374	YP_583125.1	Q1LPS0 Gamma-glutamyltransferase 1. Threonine peptidase. MEROPS family T03
Rmet_0971	NeF		NeF		YP_583126.1	Q1LPR9 Twin-arginine translocation pathway signal
Rmet_0972	714.344	209.174	919.8	286.691	YP_583127.1	Q1LPR8 Aminoglycoside phosphotransferase
Rmet_0973	343.175	8.41107	424.812	102.851	YP_583128.1	Q1LPR7 Enoyl-CoA hydratase / short chain enoyl-CoA hydratase
Rmet_0974	415.051	11.0046	372.774	137.033	YP_583129.1	Q1LPR6 3-hydroxyacyl-CoA dehydrogenase
Rmet_0975	553.315	10.8929	394.78	72.7149	YP_583130.1	Q1LPR5 Glutathione S-transferase-like protein
Rmet_0976	502.772	53.9253	706.884	214.638	YP_583131.1	Q1LPR4 2-keto-4-methylthiobutyrate aminotransferase
Rmet_0977	113.69	70.6517	84.0083	37.4746	YP_583132.1	Q1LPR3 Putative uncharacterized protein
Rmet_0978	254.121	44.55	202.732	34.1727	YP_583133.1	Q1LPR2 UPF0246 protein Rmet_0978
Rmet_0979	469.553	12.8015	554.513	47.2328	YP_583134.1	Q1LPR1 Peptidase M14, carboxypeptidase A
Rmet_0980	228.836	27.0964	167.742	102.301	YP_583135.1	Q1LPR0 Putative lipoprotein transmembrane
Rmet_0981	267.924	179.518	79.4074	8.31813	YP_583136.1	Q1LPQ9 N-formylglutamate amidohydrolase
Rmet_0982	652.059	394.978	665.715	614.902	YP_583137.1	Q1LPQ8 Uncharacterized protein UPF0065
Rmet_0983	251.882		54.6441		YP_583138.1	Q1LPQ7 Transcriptional regulator, LysR family
Rmet_0984	554.532	44.018	297.975	1.38594	YP_583139.1	Q1LPQ6 Putative uncharacterized protein
Rmet_0985	1011.03	115.571	1151.98	151.353	YP_583140.1	Q1LPQ5 GCN5-related N-acetyltransferase
Rmet_0986	2521.21	266.563	2875.04	307.14	YP_583141.1	Q1LPQ4 ATPase associated with various cellular activities, AAA_5
Rmet_0987	2736.04	655.523	1913.62	605.8	YP_583142.1	Q1LPQ3 Cytochrome c, class I
Rmet_0988	2516.46	448.228	1719.38	507.716	YP_583143.1	Q1LPQ2 Cytochrome c, class I
Rmet_0989	1309.13	206.906	2399.37	297.889	YP_583144.1	Q1LPQ1 3-deoxy-D-arabinoheptulosonate-7-phosphate synthase
Rmet_0990	NeF		NeF		YP_583145.1	Q1LPQ0 Methyltransferase type 12
Rmet_0991	568.82	73.166	466.082	84.825	YP_583146.1	Q1LPP9 Putative uncharacterized protein
Rmet_0992	136.363	17.7933	170.867	31.1079	YP_583147.1	Q1LPP8 Nitrilase/cyanide hydratase and apolipoprotein N-acyltransferase
Rmet_0993	385.438	141.954	537.916	460.769	YP_583148.1	Q1LPP7 Putative uncharacterized protein
Rmet_0994	661.331	53.9943	674.949	36.5634	YP_583149.1	Q1LPP6 Glutamate-ammonia ligase adenylyltransferase
Rmet_0995	NeF		NeF		YP_583150.1	Q1LPP5 Putative transmembrane protein
Rmet_0996	NeF		NeF		YP_583151.1	Q1LPP4 Peptidase MprA. Serine peptidase. MEROPS family S08A
Rmet_0997	146.776	121.868	115.657	19.5417	YP_583152.1	Q1LPP3 Putative lipoprotein
Rmet_0998	301.686	63.1287	416.815	142.723	YP_583153.1	Q1LPP2 DNA repair protein RecN
Rmet_0999	153.298	35.9875	169.208	16.2721	YP_583154.1	Q1LPP1 ATP-NAD/AcoX kinase
Rmet_1000	326.954	63.278	638.924	491.241	YP_583155.1	Q1LPP0 Heat-inducible transcription repressor HrcA
Rmet_1001	93.4099	5.71627	54.0065	1.34607	YP_583156.1	Q1LPN9 Ferrochelatase
Rmet_1002	85.803	0.541165	108.503	26.7227	YP_583157.1	Q1LPN8 RNA-binding S4
Rmet_1003	NeF		NeF		YP_583158.1	Q1LPN7 Putative uncharacterized protein
Rmet_1004	1725.17	473.569	2170.16	73.5979	YP_583159.1	Q1LPN6 GrpE protein
Rmet_1005	47.0714		78.5412	25.4212	YP_583160.1	Q1LPN5 Putative thioredoxin protein
Rmet_1006	25.1933		NF/NF		YP_583161.1	Q1LPN4 Putative phospholipase
Rmet_1007	NeF		NeF		YP_583162.1	Q1LPN3 Putative uncharacterized protein
Rmet_1008	NeF		NeF		YP_583163.1	Q1LPN2 Putative uncharacterized protein
Rmet_1009	1081.62	201.887	2809.85	667.755	YP_583164.1	Q1LPN1 Nitroreductase
Rmet_1010	24.7627		NF/NF		YP_583165.1	Q1LPN0 Putative uncharacterized protein involved in ubiquinone biosynthesis
Rmet_1011	NeF		NeF		YP_583166.1	Q1LPM9 Alpha/beta hydrolase fold
Rmet_1012	101.399	71.7598	84.2791		YP_583167.1	Q1LPM8 Cyclohexanone monooxygenase
Rmet_1013	NF/NF		39.3323		YP_583168.1	Q1LPM7 Transcriptional regulator, TetR family
Rmet_1014	24.835		62.0214		YP_583169.1	Q1LPM6 DNA-(Apurinic or apyrimidinic site) lyase / endonuclease III
Rmet_1015	85.3766	49.5725	70.8835	16.1885	YP_583170.1	Q1LPM5 Electron transport complex, RnfABCDGE type, B subunit
Rmet_1016	183.142	101.348	149.57	46.2101	YP_583171.1	Q1LPM4 Transcriptional regulator, TetR family
Rmet_1017	164.795	114.839	100.449	40.7252	YP_583172.1	Q1LPM3 Polyhydroxyalkanoate depolymerase, intracellular
Rmet_1018	5020.52	299.883	4749.77	201.694	YP_583173.1	Q1LPM2 Aminotransferase
Rmet_1019	364.878	13.6688	362.167	102.028	YP_583174.1	Q1LPM1 UvrABC system protein B
Rmet_1020	NeF		NeF		YP_583175.1	Q1LPM0 Putative uncharacterized protein
Rmet_1021	315.477	71.6559	346.913	73.5951	YP_583176.1	Q1LPL9 Putative uncharacterized protein
Rmet_1022	106.656	14.1387	115.109	44.4214	YP_583177.1	Q1LPL8 Protein tyrosine phosphatase
Rmet_1023	19.8366		NF/NF		YP_583178.1	Q1LPL7 Putative site-specific recombinase transmembrane protein
Rmet_1024	203.602	31.71	400.778	140.55	YP_583179.1	Q1LPL6 Transcriptional regulator, BadM/Rrf2 family
Rmet_1025	1212.6	105.048	1254.03	111.722	YP_583180.1	Q1LPL5 Cysteine desulfurase IscS
Rmet_1026	1123.18	52.9603	1336.6	225.545	YP_583181.1	Q1LPL4 FeS cluster assembly scaffold IscU
Rmet_1027	413.709	29.8938	407.482	45.0533	YP_583182.1	Q1LPL3 Iron-sulfur cluster assembly protein IscA
Rmet_1028	175.064	39.5337	182.137	61.6504	YP_583183.1	Q1LPL2 Co-chaperone Hsc20
Rmet_1029	657.213	243.113	790.197	454.466	YP_583184.1	Q1LPL1 Chaperone protein hscA homolog
Rmet_1030	449.207	72.8315	508.257	37.3953	YP_583185.1	Q1LPL0 Ferredoxin, 2Fe-2S type
Rmet_1031	209.953	1.38671	280.817	51.594	YP_583186.1	Q1LPK9 Putative uncharacterized protein
Rmet_1032	NeF		NeF		YP_583187.1	Q1LPK8 Putative uncharacterized protein
Rmet_1033	104.151	103.782	NF/NF		YP_583188.1	Q1LPK7 17 kDa surface antigen
Rmet_1034	1319.9	146.234	1231.71	143.991	YP_583189.1	Q1LPK6 Lysyl-tRNA synthetase
Rmet_1035	522.338	140.631	545.863	204.906	YP_583190.1	Q1LPK5 Short-chain dehydrogenase/reductase SDR
Rmet_1036	673.786	40.2453	752.828	72.2669	YP_583191.1	Q1LPK4 Bacterial peptide chain release factor 2 (BRF-2)
Rmet_1037	54.0462	7.52784	44.563	9.10739	YP_583192.1	Q1LPK3 Peptidase M23B
Rmet_1038	114.506	7.52579	234.041	297.414	YP_583193.1	Q1LPK2 Exonuclease RecJ
Rmet_1039	68.434	15.3214	38.0065	1.40581	YP_583194.1	Q1LPK1 Putative uncharacterized protein
Rmet_1040	576.38	175.674	47.4863	2.72674	YP_583195.1	Q1LPK0 Lipoprotein releasing system, transmembrane protein, LolC/E family
Rmet_1041	158.651	3.53269	86.8191	10.1528	YP_583196.1	Q1LPJ9 Lipoprotein-releasing system ATP-binding protein lolD
Rmet_1042	103.113		NF/NF		YP_583197.1	Q1LPJ8 TatD-related deoxyribonuclease
Rmet_1043	NeF		NeF		YP_583198.1	Q1LPJ7 DNA internalization-related competence protein ComEC/Rec2
Rmet_1044	2219.78	130.067	1789.59	88.2045	YP_583199.1	Q1LPJ6 Transcriptional regulator, RpiR family
Rmet_1045	1721.79	108.444	2060.28	95.6707	YP_583200.1	Q1LPJ5 6-phosphogluconate dehydratase
Rmet_1046	1552.73	137.826	1497.88	508.369	YP_583201.1	Q1LPJ4 Gluconate kinase
Rmet_1047	445.592	75.8053	419.248	18.394	YP_583202.1	Q1LPJ3 Putative uncharacterized protein
Rmet_1048	90.4218	32.2454	134.099	31.0795	YP_583203.1	Q1LPJ2 Putative uncharacterized protein
Rmet_1049	46.2719	3.69418	NF/NF		YP_583204.1	Q1LPJ1 Transglutaminase-like protein
Rmet_1050	297.693	41.2545	350.722	19.3485	YP_583205.1	Q1LPJ0 Putative proteasome-type protease
Rmet_1051	33.1885	1.44462	NF/NF		YP_583206.1	Q1LPI9 Alpha/beta hydrolase fold
Rmet_1052	1642.19	46.6017	1738.02	121.74	YP_583207.1	Q1LPI8 CTP synthase
Rmet_1053	1082.74	96.2779	1124.07	100.691	YP_583208.1	Q1LPI7 2-dehydro-3-deoxyphosphooctonate aldolase
Rmet_1054	490.315	193.528	500.865	236.521	YP_583209.1	Q1LPI6 Putative uncharacterized protein
Rmet_1055	3787.34	113.516	4583.55	20.964	YP_583210.1	Q1LPI5 Enolase 1
Rmet_1056	115.306	58.1105	36.1803		YP_583211.1	Q1LPI4 Cell division protein ftsB homolog
Rmet_1057	NeF		NeF		YP_583212.1	Q1LPI3 Putative uncharacterized protein
Rmet_1058	681.756	20.9728	695.212	21.0911	YP_583213.1	Q1LPI2 Hsp33 protein
Rmet_1059	1262.58	35.0325	1482.64	15.4542	YP_583214.1	Q1LPI1 Transferase hexapeptide repeat
Rmet_1060	NeF		NeF		YP_583215.1	Q1LPI0 Putative uncharacterized protein
Rmet_1061	301.827	50.0455	397.067	37.5801	YP_583216.1	Q1LPH9 AMP-dependent synthetase and ligase
Rmet_1062	180.965	53.0762	174.882	49.224	YP_583217.1	Q1LPH8 Alpha/beta hydrolase fold
Rmet_1063	265.443	76.9669	237.95	7.64284	YP_583218.1	Q1LPH7 FAD-dependent pyridine nucleotide-disulphide oxidoreductase
Rmet_1064	233.376	49.2865	264.748	50.9714	YP_583219.1	Q1LPH6 PHP-like protein
Rmet_1065	194.962	105.303	270.331	23.064	YP_583220.1	Q1LPH5 Sua5/YciO/YrdC/YwlC
Rmet_1066	86.4125	43.2238	NF/NF		YP_583221.1	Q1LPH4 Peptidase M50
Rmet_1067	124.454	1.4256	113.649	32.5414	YP_583222.1	Q1LPH3 Methyltransferase type 12
Rmet_1068	2376.37	60.1924	2876.47	70.1923	YP_583223.1	Q1LPH2 Dihydrodipicolinate synthase
Rmet_1069	2101.62	280.796	1539.97	495.007	YP_583224.1	Q1LPH1 Putative transmembrane protein
Rmet_1070	NeF		NeF		YP_583225.1	Q1LPH0 Beta-lactamase-like protein
Rmet_1071	NeF		NeF		YP_583226.1	Q1LPG9 Putative uncharacterized protein
Rmet_1072	356.697	39.1779	381.005	64.9481	YP_583227.1	Q1LPG8 Cupin 4
Rmet_1073	2028.66	190.938	2556.96	336.166	YP_583228.1	Q1LPG7 Putative fkbp-type peptidyl-prolyl cis-trans isomerase (Rotamase) protein
Rmet_1074	NF/NF		NF/NF		YP_583229.1	Q1LPG6 Putative transmembrane protein
Rmet_1075	353.805	1.03854	374.005	16.7943	YP_583230.1	Q1LPG5 DNA mismatch repair protein mutS
Rmet_1076	NeF		NeF		YP_583231.1	Q1LPG4 Putative uncharacterized protein
Rmet_1077	NeF		NeF		YP_583232.1	Q1LPG3 YcfA-like protein
Rmet_1078	688.13	22.853	703.806	152.976	YP_583233.1	Q1LPG2 Inositol monophosphatase
Rmet_1079	189.213	82.3789	198.274	64.5327	YP_583234.1	Q1LPG1 RNA methyltransferase TrmH, group 1
Rmet_1080	303.705	250.443	148.199	11.4257	YP_583235.1	Q1LPG0 Serine O-acetyltransferase
Rmet_1081	97.7408	43.6989	45.8945	12.3097	YP_583236.1	Q1LPF9 UDP-2,3-diacylglucosamine hydrolase
Rmet_1082	5805.1	569.553	7029.3	499.565	YP_583237.1	Q1LPF8 Peptidyl-prolyl cis-trans isomerase
Rmet_1083	2244.72	151.337	1470.06	47.038	YP_583238.1	Q1LPF7 Peptidyl-prolyl cis-trans isomerase
Rmet_1084	603.787	75.206	473.164	27.3719	YP_583239.1	Q1LPF6 Tetratricopeptide TPR_2
Rmet_1085	748.409	31.6951	935.094	24.0616	YP_583240.1	Q1LPF5 Cysteinyl-tRNA synthetase
Rmet_1086	53.9258	7.65356	125.381	46.5363	YP_583241.1	Q1LPF4 HhH-GPD
Rmet_1087	998.187	214.103	910.106	138.919	YP_583242.1	Q1LPF3 Acetyl-coenzyme A carboxylase carboxyl transferase subunit alpha
Rmet_1088	NF/NF		NF/NF		YP_583243.1	Q1LPF2 tRNA(Ile)-lysidine synthetase-like protein
Rmet_1089	2189.26	114.478	2192.17	287.718	YP_583244.1	Q1LPF1 Aspartokinase
Rmet_1090	NeF		NeF		YP_583245.1	Q1LPF0 EAL-containing signal transduction protein
Rmet_1091	NeF		NeF		YP_583246.1	Q1LPE9 Diguanylate cyclase (GGDEF domain)
Rmet_1092	NeF		NeF		YP_583247.1	Q1LFA7 Anion transporter
Rmet_1093	195.912	70.9998	385.584	54.7298	YP_583248.1	Q1LPE7 Alcohol dehydrogenase GroES-like protein
Rmet_1094	NeF		NeF		YP_583249.1	Q1LPE6 Putative uncharacterized protein
Rmet_1095	29.4569		NF/NF		YP_583250.1	Q1LPE5 Putative uncharacterized protein
Rmet_1096	NeF		NeF		YP_583251.1	Q1LPE4 Glyceraldehyde 3-phosphate dehydrogenase
Rmet_1097	NF/NF		NF/NF		YP_583252.1	Q1LPE3 Putative uncharacterized protein
Rmet_1098	NeF		NeF		YP_583253.1	Q1LPE2 Cobalamin synthesis protein, P47K
Rmet_1099	NeF		NeF		YP_583254.1	Q1LPE1 UPF0343 protein Rmet_1099
Rmet_1100	NeF		NeF		YP_583255.1	Q1LPE0 Cysteinyl-tRNA synthetase
Rmet_1101	NeF		NeF		YP_583256.1	Q1LPD9 6-pyruvoyl-tetrahydropterin synthase-like protein
Rmet_1102	NF/NF		NF/NF		YP_583257.1	Q1LPD8 Carbonic anhydrases/acetyltransferase isoleucine patch superfamily
Rmet_1103	NeF		NeF		YP_583258.1	Q1LPD7 Dihydroorotase
Rmet_1104	NeF		NeF		YP_583259.1	Q1LPD6 TonB-dependent siderophore receptor
Rmet_1105	NeF		NeF		YP_583260.1	Q1LPD5 Putative uncharacterized protein
Rmet_1106	NeF		NeF		YP_583261.1	Q1LPD4 PepSY-associated TM helix
Rmet_1107	NeF		NeF		YP_583262.1	Q1LPD3 Putative uncharacterized protein
Rmet_1108	NeF		NeF		YP_583263.1	Q1LPD2 TonB-dependent siderophore receptor
Rmet_1109	NF/NF		NF/NF		YP_583264.1	Q1LPD1 Putative uncharacterized protein
Rmet_1110	NF/NF		NF/NF		YP_583265.1	Q1LPD0 Orn/DAP/Arg decarboxylase 2
Rmet_1111	NF/NF		45.0114		YP_583266.1	Q1LPC9 HpcH/HpaI aldolase
Rmet_1112	22.3704	10.7031	NF/NF		YP_583267.1	Q1LPC8 IucA/IucC
Rmet_1113	221.142		NF/NF		YP_583268.1	Q1LPC7 IucA/IucC
Rmet_1114	NeF		NeF		YP_583269.1	Q1LPC6 Major facilitator superfamily MFS_1
Rmet_1115	NeF		NeF		YP_583270.1	Q1LPC5 IucA/IucC
Rmet_1116	298.817	139.352	373.051	45.9536	YP_583271.1	Q1LPC4 Ornithine cyclodeaminase
Rmet_1117	NF/NF		NF/NF		YP_583272.1	Q44004 Cysteine synthase
Rmet_1118	209.063	4.53066	83.6655	17.7274	YP_583273.1	Q1LPC2 TonB-dependent siderophore receptor
Rmet_1119	1538.15		NF/NF		YP_583274.1	Q1LPC1 Putative FecR
Rmet_1120	NeF		NeF		YP_583275.1	Q1LPC0 Sigma-24 (FecI-like)
Rmet_1121	165.338	93.552	NF/NF		YP_583276.1	Q1LPB9 Hydrophobe/amphiphile efflux-1 HAE1
Rmet_1122	NeF		NeF		YP_583277.1	Q1LPB8 Sodium:dicarboxylate symporter
Rmet_1123	NeF		NeF		YP_583278.1	Q1LPB7 Extracellular solute-binding protein, family 3
Rmet_1124	NeF		NeF		YP_583279.1	Q1LPB6 Oxidoreductase alpha (Molybdopterin) subunit
Rmet_1125	NeF		NeF		YP_583280.1	Q1LPB5 Formate dehydrogenase family accessory protein FdhD
Rmet_1126	NeF		NeF		YP_583281.1	Q1LPB4 Transcriptional regulator, GntR family
Rmet_1127	36.5298		NF/NF		YP_583282.1	Q1LPB3 Putative DNA-binding protein
Rmet_1128	597.186	79.0642	645.248	161.467	YP_583283.1	Q1LPB2 FAD linked oxidase-like protein
Rmet_1129	NeF		NeF		YP_583284.1	Q1LPB1 Putative transmembrane protein
Rmet_1130	158.258	78.8575	242.539	49.995	YP_583285.1	Q1LPB0 Flavodoxin/nitric oxide synthase
Rmet_1131	67.8974	0.754972	33.3532	1.67186	YP_583286.1	Q1LPA9 tRNA-processing RNAse BN
Rmet_1132	NeF		NeF		YP_583287.1	Q1LPA8 Putative transmembrane protein
Rmet_1133	372.556	96.0348	569.823	55.615	YP_583288.1	Q1LPA7 Alpha/beta hydrolase fold
Rmet_1134	977.525	56.6876	1246.55	86.2965	YP_583289.1	Q1LPA6 O-acetylhomoserine/O-acetylserine sulfhydrylase
Rmet_1135	1832.36	58.3361	2230.4	85.5465	YP_583290.1	Q1LPA5 Putative signal-transduction protein with CBS domains
Rmet_1136	NeF		NeF		YP_583291.1	Q1LPA4 Phospholipid/glycerol acyltransferase
Rmet_1137	101.446	27.8141	48.9339	11.1097	YP_583292.1	Q1LPA3 Putative glutathione S-transferase
Rmet_1138	1300.82	123.828	1414.76	99.5596	YP_583293.1	Q1LPA2 Chorismate synthase
Rmet_1139	NeF		NeF		YP_583294.1	Q1LPA1 Major facilitator superfamily MFS_1
Rmet_1140	216.414	49.5321	319.346	27.4108	YP_583295.1	Q1LPA0 FAD dependent oxidoreductase
Rmet_1141	NeF		NeF		YP_583296.1	Q1LP99 Transcriptional regulator, GntR family
Rmet_1142	NeF		NeF		YP_583297.1	Q1LP98 Type IV pilus assembly PilZ
Rmet_1143	NeF		NeF		YP_583298.1	Q1LP97 Putative uncharacterized protein
Rmet_1144	NeF		NeF		YP_583299.1	Q1LP96 DMSO-membrane protein
Rmet_1145	83.5522		NF/NF		YP_583300.1	Q1LP95 Molybdopterin guanine dinucleotide-containing S/N-oxide reductase
Rmet_1146	2132.79	333.27	1775.67	414.712	YP_583301.1	Q1LP94 Electron transfer flavoprotein-ubiquinone oxidoreductase
Rmet_1147	1151.72	335.544	1349.53	346.666	YP_583302.1	Q1LP93 Short-chain dehydrogenase/reductase SDR
Rmet_1148	86.4481	46.8001	NF/NF		YP_583303.1	Q1LP92 Tripartite ATP-independent periplasmic transporter, DctQ component
Rmet_1149	NeF		NeF		YP_583304.1	Q1LP91 TRAP dicarboxylate transporter-DctM subunit
Rmet_1150	1564.87	125.511	1035.15	36.8304	YP_583305.1	Q1LP90 TRAP dicarboxylate transporter, DctP subunit
Rmet_1151	144.68	0.802446	148.552	12.8885	YP_583306.1	Q1LP89 Thioesterase superfamily
Rmet_1152	76.2941	16.1354	110.497	34.5436	YP_583307.1	Q1LP88 Transcriptional regulator, LuxR family
Rmet_1153	604.293	64.214	690.571	115.054	YP_583308.1	Q1LP87 3-oxoacid CoA-transferase, subunit A
Rmet_1154	835.622	92.4071	988.051	189.542	YP_583309.1	Q1LP86 Butyryl-CoA:acetate CoA transferase
Rmet_1155	80.2115	26.5188	44.7756		YP_583310.1	Q1LP85 Putative uncharacterized protein
Rmet_1156	1913.23	102.609	2307.14	310.669	YP_583311.1	Q1LP84 3-hydroxybutyrate dehydrogenase
Rmet_1157	728.282	92.4273	646.18	95.2354	YP_583312.1	Q1LP83 Alpha/beta hydrolase fold
Rmet_1158	NF/NF		51.8792		YP_583313.1	Q1LP82 Endoribonuclease L-PSP
Rmet_1159	334.115	42.3465	262.546	62.789	YP_583314.1	Q1LP81 (P)ppGpp synthetase I (GTP pyrophosphokinase), SpoT/RelA
Rmet_1160	1118.66	45.4105	1126.05	223.121	YP_583315.3	Q1LP80 Threonyl-tRNA synthetase / Ser-tRNA(Thr) hydrolase
Rmet_1161	2125.24	74.2041	2437.23	1.1802	YP_583316.1	Q1LP79 Translation initiation factor IF-3
Rmet_1162	968.323	363.548	2854.98		YP_583317.1	Q1LP78 50S ribosomal protein L35
Rmet_1163	5230.11	83.7246	4874.44	700.659	YP_583318.1	Q1LP77 50S ribosomal protein L20
Rmet_1164	1471.29	96.2049	1431.64	154.155	YP_583319.1	Q1LP76 Phenylalanyl-tRNA synthetase alpha chain
Rmet_1165	1531.95	220.104	1729.53	276.298	YP_583320.1	Q1LP75 Phenylalanyl-tRNA synthetase beta subunit
Rmet_1166	540.253	111.159	561.239	85.0308	YP_583321.1	Q1LP74 Integration host factor, alpha subunit
Rmet_1167	459.452	51.5248	507.726	135.991	YP_583322.1	Q1LP73 Transcriptional regulator, MerR family
Rmet_1168	104.314	8.28593	41.4178	27.0676	YP_583323.1	Q1LP72 Putative acetyl transferase protein
Rmet_1169	NeF		NeF		YP_583324.1	Q1LP71 Peptide methionine sulfoxide reductase
Rmet_1170	NeF		NeF		YP_583325.1	Q1LP70 Cytochrome c biogenesis protein, transmembrane region
Rmet_1171	34.2595	17.7722	NF/NF		YP_583326.1	Q9F8S6 Transposase (Transposase, IS4 family)
Rmet_1172					NPDB	Q1LP68 Twin-arginine translocation pathway signal
Rmet_1173	NeF		NeF		YP_583328.1	Q1LP67 Two component transcriptional regulator, winged helix family
Rmet_1174	161.369	96.1929	NF/NF		YP_583329.1	Q1LP66 Sensor protein
Rmet_1175	NF/NF		38.2639		YP_583330.1	Q1LP65 Transcriptional regulator, LysR family
Rmet_1176	NF/NF		273.431		YP_583331.1	Q1LP64 Enolase 2
Rmet_1177	NeF		NeF		YP_583332.1	Q1LP63 Putative uncharacterized protein
Rmet_1178	NeF		NeF		YP_583333.1	Q1LP62 Putative uncharacterized protein
Rmet_1179	239.153		115.361	36.0967	YP_583334.1	Q1LP61 Putative uncharacterized protein
Rmet_1180	23.2331		NF/NF		YP_583335.1	Q1LP60 Putative uncharacterized protein
Rmet_1181	89.1595		NF/NF		YP_583336.1	Q1LP59 Glutamate dehydrogenase (NAD)
Rmet_1182	NF/NF		NF/NF		YP_583337.1	Q1LP58 Putative uncharacterized protein
Rmet_1183	NeF		NeF		YP_583338.1	Q1LP57 Conserved hypothetical signal peptide protein
Rmet_1184	1573.7	384.421	1071.84	360.995	YP_583339.1	Q1LP56 Uncharacterized protein UPF0065
Rmet_1185	34.553	11.7889	NF/NF		YP_583340.1	Q1LP55 Transcriptional regulator, LysR family
Rmet_1186	NF/NF		NF/NF		YP_583341.1	Q1LP54 Amidohydrolase
Rmet_1187	1363.05	558.031	1890.82	522.238	YP_583342.1	Q1LP53 Putative uncharacterized protein
Rmet_1188	NeF		NeF		YP_583343.1	Q1LP52 Sulphate transporter
Rmet_1189	451.712	154.013	589.44	229.549	YP_583344.1	Q1LP51 Exodeoxyribonuclease III
Rmet_1190	NeF		NeF		YP_583345.1	Q1LP50 Putative uncharacterized protein
Rmet_1191	1184.72	65.8111	1523.31	220.675	YP_583346.1	Q1LP49 Oligopeptidase A. Metallo peptidase. MEROPS family M03A
Rmet_1192	969.692	47.0731	1246.04	67.0292	YP_583347.1	Q1LP48 Bifunctional protein folD
Rmet_1193	NeF		NeF		YP_583348.1	Q1LP47 Putative membrane protein
Rmet_1194	3695.55	225.305	4155.3	213.438	YP_583349.1	Q1LP46 Two component transcriptional regulator, LuxR family
Rmet_1195	212.573	19.2436	101.187	2.52619	YP_583350.1	Q1LP45 Sensor protein
Rmet_1196	3692.24	132.444	4362.78	240.354	YP_583351.1	Q1LP44 2-oxo-acid dehydrogenase E1 component, homodimeric type
Rmet_1197	2722.19	226.5	3266.78	140.962	YP_583352.1	Q1LP43 Dihydrolipoamide acetyltransferase
Rmet_1198	299.881	169.978	273.237	191.287	YP_583353.1	Q1LP42 20S proteasome, A and B subunits
Rmet_1199	1575.1	305.071	1801.97	397.734	YP_583354.1	Q1LP41 Dihydrolipoamide dehydrogenase
Rmet_1200	2693.71	376.847	2115.12	79.3744	YP_583355.1	Q1LP40 Phasin
Rmet_1201	27.8119	5.38851	52.9173	3.72729	YP_583356.1	Q1LP39 Histone deacetylase superfamily
Rmet_1202	138.179	20.7121	151.686	86.8159	YP_583357.1	Q1LP38 Thioesterase superfamily
Rmet_1203	299.037	29.6624	487.644	103.628	YP_583358.1	Q1LP37 Nitroreductase
Rmet_1204	14.8331		673		YP_583359.1	Q1LP36 Murein-DD-endopeptidase. Serine peptidase. MEROPS family S11
Rmet_1205	558.731	38.357	473.966	31.9464	YP_583360.1	Q1LP35 Transcriptional regulator, IclR family
Rmet_1206	343.43	45.9293	262.447	72.653	YP_583361.1	Q1LP34 Putative uncharacterized protein
Rmet_1207	226.003	9.92135	105.588	3.59051	YP_583362.1	Q1LP33 Iron-sulfur cluster binding protein
Rmet_1208	421.069	31.8249	473.798	13.6178	YP_583363.1	Q1LP32 Putative uncharacterized protein
Rmet_1209	961.223	85.5367	1341.64	318.744	YP_583364.1	Q1LP31 ABC transporter-related protein
Rmet_1210	NeF		NeF		YP_583365.1	Q1LP30 Inner-membrane translocator
Rmet_1211	5079.83	401.223	6638.31	1452.65	YP_583366.1	Q1LP29 Putative uncharacterized protein
Rmet_1212	128.813	14.4259	168.546	35.0538	YP_583367.1	Q1LP28 Aldo/keto reductase
Rmet_1213	503.283	9.48768	410.052	54.7062	YP_583368.1	Q1LP27 Dihydroorotate dehydrogenase
Rmet_1214	NeF		NeF		YP_583369.1	Q1LP26 Putative arginyl-tRNA--protein transferase
Rmet_1215					NPDB	Q1LP25 Putative uncharacterized protein
Rmet_1216	NF/NF		78.1212		YP_583371.1	Q1LP24 Leucyl/phenylalanyl-tRNA--protein transferase
Rmet_1217	270.723	37.4107	394.304	104.16	YP_583372.1	Q1LP23 NUDIX hydrolase
Rmet_1218	NeF		NeF		YP_583373.1	Q1LP22 Putative uncharacterized protein
Rmet_1219	NeF		NeF		YP_583374.1	Q1LP21 Putative uncharacterized protein
Rmet_1220	NeF		NeF		YP_583375.1	Q1LP20 Benzoyl-CoA oxygenase, component A
Rmet_1221	126.653	113.604	NF/NF		YP_583376.1	Q1LP19 Benzoyl-CoA oxygenase, component B
Rmet_1222	NeF		NeF		YP_583377.1	Q1LP18 2,3-dihydro-2,3-dihydroxybenzoyl-CoA ring cleavage enzyme
Rmet_1223	21.6704		NF/NF		YP_583378.1	Q1LP17 Transcriptional regulator, XRE family with shikimate kinase activity
Rmet_1224	NeF		NeF		YP_583379.1	Q1LP16 Benzoate-CoA ligase
Rmet_1225	NF/NF		464.919		YP_583380.1	Q1LP15 Alpha/beta hydrolase fold
Rmet_1226	270.916	12.39	170.91	93.5653	YP_583381.1	Q1LP14 Extracellular ligand-binding receptor
Rmet_1227	NeF		NeF		YP_583382.1	Q1LP13 Inner-membrane translocator
Rmet_1228	NeF		NeF		YP_583383.1	Q1LP12 Inner-membrane translocator
Rmet_1229	55.6498		36.7679		YP_583384.1	Q1LP11 ABC transporter-related protein
Rmet_1230	40.0778	4.70387	NF/NF		YP_583385.1	Q1LP10 ABC transporter-related protein
Rmet_1231	176.508	76.4194	89.6706	39.1362	YP_583386.1	Q1LP09 Probable potassium transport system protein kup
Rmet_1232	667.802	45.8129	557.819	99.625	YP_583387.1	Q1LP08 RNA binding S1
Rmet_1233	166.211	9.79205	128.605	39.5744	YP_583388.1	Q1LP07 Putative uncharacterized protein
Rmet_1234	56.5276	27.993	101.887	0.153711	YP_583389.1	Q1LP06 Putative uncharacterized protein
Rmet_1235	46.5851	20.0499	99.0116		YP_583390.1	Q1LP05 Helicase c2
Rmet_1236	NF/NF		NF/NF		YP_583391.1	Q1LP04 Phage integrase
Rmet_1237	NF/NF		75.0758	7.9059	YP_583392.1	Q1LP03 Putative uncharacterized protein
Rmet_1238					NPDB	Q1LP02 DNA repair protein RadC
Rmet_1239	234.326	39.6514	365.247		YP_583394.1	Q1LP01 Phage integrase
Rmet_1240	NeF		NeF		YP_583395.1	Q1LP00 Phage integrase
Rmet_1241	278.952	123.451	556.11	263.105	YP_583396.1	Q1LNZ9 Phage integrase
Rmet_1242					NPDB	Q1LNZ8 RadC family protein
Rmet_1243	NeF		NeF		YP_583398.1	Q1LNZ7 Putative uncharacterized protein
Rmet_1244	NF/NF		NF/NQ		YP_583399.3	Q1LNZ6 Putative uncharacterized protein
Rmet_1245	203.57	5.04397	342.198		YP_583400.1	Q1LNZ5 ParB family protein
Rmet_1246	NeF		NeF		YP_583401.1	Q1LNZ4 GCN5-related N-acetyltransferase
Rmet_1249	NF/NF		NF/NF		YP_583403.1	Q1LNZ1 Putative lipoprotein
Rmet_1250	NeF		NeF		YP_583404.1	Q1LNZ0 Integrase, catalytic region
Rmet_1251	NQ/NQ		NF/NF		YP_583405.1	Q1LNY9 Putative uncharacterized protein
Rmet_1252	NeF		NeF		YP_583406.1	Q1LNY8 Putative uncharacterized protein
Rmet_1253	NeF		NeF		YP_583407.1	Q1LNY7 Conserved hypothetical replication initiator and transcription repressor protein
Rmet_1254	NeF		NeF		YP_583408.1	Q1LNY6 Cobyrinic acid a,c-diamide synthase
Rmet_1255	28.0502		NF/NF		YP_583409.1	Q1LNY5 Putative uncharacterized protein
Rmet_1256	NeF		NeF		YP_583410.1	Q1LNY4 Putative uncharacterized protein
Rmet_1257	NeF		NeF		YP_583411.1	Q1LNY3 TraF peptidase. Serine peptidase. MEROPS family S26C
Rmet_1258	NeF		NeF		YP_583412.1	Q1LNY2 Putative uncharacterized protein
Rmet_1259	NF/NF		58.3327		YP_583413.1	Q1LNY1 Putative uncharacterized protein
Rmet_1260	1259.17	724.259	NF/NF		YP_583414.1	Q1LNY0 Putative uncharacterized protein
Rmet_1261	31.4743		13.5184		YP_583415.1	Q1LNY0 Putative uncharacterized protein
Rmet_1262	NF/NF		NF/NQ		YP_583416.1	Q1LL29 Transposase, mutator type
Rmet_1263	NeF		NeF		YP_583417.1	Q1LNX8 IstB-like ATP-binding protein
Rmet_1264	NeF		NeF		YP_583418.1	Q1LNX7 Integrase, catalytic region
Rmet_1265	NeF		NeF		YP_583419.1	Q1LNX6 Putative uncharacterized protein
Rmet_1266	NeF		NeF		YP_583420.1	Q1LNX5 Beta-lactamase-like protein
Rmet_1267	NeF		NeF		YP_583421.1	Q1LNX4 RND efflux system, outer membrane lipoprotein, NodT
Rmet_1268	NeF		NeF		YP_583422.1	Q1LNX3 ABC-type multidrug transport system permease component
Rmet_1269	NeF		NeF		YP_583423.1	Q1LNX2 ABC-type multidrug transport system permease component
Rmet_1270					NPDB	Q1LNX1 ISPsy5, transposase
Rmet_1271	NF/NF		395.88		YP_583425.1	Q1LNX0 Phage integrase
Rmet_1272	NeF		NeF		YP_583426.1	Q1LNW9 Phage integrase
Rmet_1273	NeF		NeF		YP_583427.1	Q1LNW8 Phage integrase
Rmet_1274					NPDB	Q1LNW7 Transposase IS66
Rmet_1275	NeF		NeF		YP_583429.1	Q1LNW6 IS66 Orf2 like
Rmet_1276	2268.33		130.602	10.4376	YP_583430.1	Q1LNW5 Putative uncharacterized protein
Rmet_1277	NF/NF		NF/NF		YP_583431.1	Q1LNW4 ATPase component ABC-type multidrug transport system
Rmet_1278					NPDB	Q1LNW3 Transposase
Rmet_1279					NPDB	Q1LNW2 Putative transposase
Rmet_1280	182.026	30.9676	NF/NF		YP_583434.1	Q1LNW1 Integrase, catalytic region
Rmet_1281	NF/NF		NF/NF		YP_583435.1	Q1LNW0 Hydrogenase expression/formation protein HypE
Rmet_1282	162.475	114.127	228.724	101.045	YP_583436.1	Q1LNV9 Hydrogenase expression/formation protein HypD
Rmet_1283	NF/NF		NF/NF		YP_583437.1	Q1LNV8 Hydrogenase assembly chaperone hypC/hupF
Rmet_1284	NF/NF		NF/NF		YP_583438.1	Q1LNV7 Hydrogenase maturation protein hypF
Rmet_1285	NF/NF		NF/NF		YP_583439.1	Q1LNV6 Hydrogenase accessory protein HypB
Rmet_1286	NF/NF		NF/NF		YP_583440.1	Q1LNV5 Hydrogenase nickel insertion protein HypA
Rmet_1287	NF/NF		NF/NF		YP_583441.1	Q1LNV4 Putative uncharacterized protein
Rmet_1288	NeF		NeF		YP_583442.1	Q1LNV3 HupJ, contains rubredoxin domain
Rmet_1289	NF/NF		NF/NF		YP_583443.1	Q1LNV2 Rubredoxin
Rmet_1290	NF/NF		NF/NF		YP_583444.1	Q1LNV1 HupH hydrogenase expression protein
Rmet_1291	NF/NF		NF/NF		YP_583445.1	Q1LNV0 Hydrogenase-1 expression HyaE
Rmet_1292	NeF		NeF		YP_583446.1	Q1LNU9 Hydrogenase assembly chaperone hypC/hupF
Rmet_1293	NF/NF		NF/NF		YP_583447.1	Q1LNU8 HyaD peptidase. Aspartic peptidase. MEROPS family A31
Rmet_1294	NeF		NeF		YP_583448.1	Q1LNU7 Putative plasmid maintenance system antidote protein, XRE family
Rmet_1295	NF/NF		NF/NF		YP_583449.1	Q1LNU6 Nickel-dependent hydrogenase b-type cytochrome subunit
Rmet_1296	NeF		NeF		YP_583450.1	Q1LNU5 HupE/UreJ protein
Rmet_1297	NF/NF		NF/NF		YP_583451.1	Q1LNU4 Nickel-dependent hydrogenase, large subunit
Rmet_1298	NF/NF		NF/NF		YP_583452.1	Q1LNU3 Hydrogenase (NiFe) small subunit (HydA)
Rmet_1299	NeF		NeF		YP_583453.1	Q1LNU2 Putative uncharacterized protein
Rmet_1300	NeF		NeF		YP_583454.1	Q1LNU1 GMC oxidoreductase
Rmet_1301	354.492	23.1924	NF/NF		YP_583455.1	Q1LNW1 Integrase, catalytic region
Rmet_1302					NPDB	Q1LNT9 Putative transposase
Rmet_1303	23.5763	7.99697	NF/NF		YP_583457.1	Q1LNT8 Transposase IS3/IS911
Rmet_1304					NPDB	Q1LNT7 Putative uncharacterized protein
Rmet_1305	737.994	228.007	137.259		YP_583459.1	Q1LNT6 Sigma-54 factor, interaction region
Rmet_1306	NF/NF		31.5745		YP_583460.1	A4JW31 Alpha/beta hydrolase fold
Rmet_1307	NeF		NeF		YP_583461.1	Q1LNT4 Membrane protein involved in aromatic hydrocarbon degradation
Rmet_1308	NF/NF		NF/NF		YP_583462.1	Q1LNT3 Alcohol dehydrogenase GroES-like protein
Rmet_1311	NF/NF		NF/NF		YP_583463.1	Q1LNT2 Oxidoreductase FAD-binding region
Rmet_1312	NF/NF		NF/NF		YP_583464.1	Q1LNT1 Methane/phenol/toluene hydroxylase
Rmet_1313	NF/NF		NF/NF		YP_583465.1	Q1LNT0 Monooxygenase component MmoB/DmpM
Rmet_1314	NF/NF		93.3405		YP_583466.1	Q1LNS9 Rieske (2Fe-2S) region
Rmet_1315	NeF		NeF		YP_583467.1	Q1LNS8 Toluene-4-monooxygenase system B
Rmet_1316	NF/NF		NF/NF		YP_583468.1	Q1LNS7 Methane/phenol/toluene hydroxylase
Rmet_1317	134.341		NF/NF		YP_583469.1	Q1LNS6 4-oxalocrotonate tautomerase family enzyme
Rmet_1318	240.395		NF/NF		YP_583470.1	Q1LNS5 Hydratase/decarboxylase
Rmet_1319	NeF		NeF		YP_583471.1	Q1LNS4 Pyruvate carboxyltransferase
Rmet_1320	48.7124		NF/NF		YP_583472.1	Q1LNS3 Semialdehyde dehydrogenase, NAD-binding
Rmet_1321	NeF		NeF		YP_583473.1	Q1LNS2 Hydratase/decarboxylase
Rmet_1322	NF/NF		659.888	188.087	YP_583474.1	Q1LNS1 Aldehyde dehydrogenase
Rmet_1323	26.7229		33.3097		YP_583475.1	Q1LNS0 Putative uncharacterized protein
Rmet_1324	NeF		NeF		YP_583476.1	Q1LNR9 Catechol 2,3-dioxygenase
Rmet_1325	NeF		NeF		YP_583477.1	Q1LNR8 Ferredoxin
Rmet_1326	NeF		NeF		YP_583478.1	Q1LNR7 Oxidoreductase FAD-binding region
Rmet_1327	NeF		NeF		YP_583479.1	Q9ANX1 TomA4
Rmet_1328	NF/NF		NF/NF		YP_583480.1	Q1LNR5 Methane/phenol/toluene hydroxylase
Rmet_1329	NF/NF		NF/NF		YP_583481.1	Q1LNR4 Monooxygenase component MmoB/DmpM
Rmet_1330	NeF		NeF		YP_583482.1	Q1LNR3 Methane/phenol/toluene hydroxylase
Rmet_1331	NeF		NeF		YP_583483.1	Q1LNR2 Phenol hydroxylase subunit
Rmet_1332					NPDB	Q1LNR1 Putative uncharacterized protein
Rmet_1333	NeF		NeF		YP_583485.1	Q1LNR0 Acetoacetyl-CoA reductase
Rmet_1334	NeF		NeF		YP_583486.1	Q1LNQ9 UspA
Rmet_1335	NF/NF		NF/NF		YP_583487.1	Q1LNQ8 Short-chain dehydrogenase/reductase SDR
Rmet_1336	NeF		NeF		YP_583488.1	Q1LNQ7 Transcriptional regulator, LysR family
Rmet_1337	NeF		NeF		YP_583489.1	Q1LNQ6 Putative lipoprotein
Rmet_1338	NeF		NeF		YP_583490.1	Q1LNQ5 Putative uncharacterized protein
Rmet_1339	NeF		NeF		YP_583491.1	Q1LNQ4 TRAG protein
Rmet_1340	NeF		NeF		YP_583492.1	Q1LN44 CopG-like DNA-binding
Rmet_1341	181.823	13.7386	282.765	142.763	YP_583493.1	Q1LNQ2 Type II secretion system protein E
Rmet_1342	NeF		NeF		YP_583494.1	Q1LNQ1 Conjugal transfer protein TrbC
Rmet_1343	NeF		NeF		YP_583495.1	Q1LNQ0 Putative conjugal transfer trbD transmembrane protein
Rmet_1344	195.557		249.726		YP_583496.1	Q1LNP9 ATPase
Rmet_1345	368.8		44.94		YP_583497.1	Q1LNP8 Putative conjugal transfer TrbJ signal peptide protein
Rmet_1346	NeF		NeF		YP_583498.1	Q1LNP7 Putative lipoprotein
Rmet_1347	NeF		NeF		YP_583499.1	Q1LNP6 TrbL/VirB6 plasmid conjugal transfer protein
Rmet_1348	NeF		NeF		YP_583500.1	Q1LNP5 Conjugal transfer protein
Rmet_1349	NeF		NeF		YP_583501.1	Q1LNP4 Conjugal transfer protein TrbG/VirB9/CagX
Rmet_1350	NeF		NeF		YP_583502.1	Q1LNP3 Conjugation TrbI-like protein
Rmet_1351	NF/NF		NF/NF		YP_583503.1	Q1LNP2 Putative uncharacterized protein
Rmet_1352	784.944	151.177	274.74	53.1592	YP_583504.1	Q1LNP1 Putative transmembrane protein
Rmet_1353	128.104	13.2942	288.584	66.5946	YP_583505.1	Q1LNP0 Pseudouridine synthase
Rmet_1354	57.6491	1.44011	79.6829	2.36134	YP_583506.1	Q1LNN9 Putative uncharacterized protein
Rmet_1355	NeF		NeF		YP_583507.1	Q1LNN8 Putative transmembrane protein
Rmet_1356	635.459	137.622	589.562	354.437	YP_583508.1	Q1LNN7 Poly(R)-hydroxyalkanoic acid synthase, class I
Rmet_1357	5759.8	750.825	6796.38	805.988	YP_583509.1	Q1LNN6 Acetyl-CoA acetyltransferase
Rmet_1358	5371.42	64.4938	5548.45	10.1576	YP_583510.1	Q1LNN5 Acetoacetyl-CoA reductase
Rmet_1359	1270.82	250.872	1220.88	246.142	YP_583511.1	Q1LNN4 Polyhydroxyalkanoate synthesis repressor PhaR
Rmet_1360	NeF		NeF		YP_583512.1	Q1LNN3 Putative uncharacterized protein
Rmet_1361	438.619	32.9205	438.004	57.1472	YP_583513.1	Q1LNN2 Putative uncharacterized protein
Rmet_1362	1335.25	247.649	2030.08	687.429	YP_583514.1	Q1LNN1 3-ketoacyl-CoA thiolase
Rmet_1363	NeF		NeF		YP_583515.1	Q1LNN0 Putative signal peptide protein
Rmet_1364	647.641	33.3384	796.171	15.097	YP_583516.1	Q1LNM9 Cystathionine beta-lyase
Rmet_1365	NeF		NeF		YP_583517.1	Q1LNM8 PepSY-associated TM helix
Rmet_1366	NeF		NeF		YP_583518.1	Q1LNM7 Putative transmembrane protein
Rmet_1367	NeF		NeF		YP_583519.1	Q1LNM6 Putative lipoprotein transmembrane
Rmet_1368	863.123	9.56909	892.795	85.5201	YP_583520.1	Q1LNM5 Phosphoserine phosphatase
Rmet_1369	NeF		NeF		YP_583521.1	Q1LNM4 Thiosulphate-binding protein
Rmet_1370	NeF		NeF		YP_583522.1	Q1LNM3 ABC transporter, substrate-binding protein, aliphatic sulphonates
Rmet_1371	NF/NF		NF/NF		YP_583523.1	Q1LNM2 Alkanesulfonate monooxygenase
Rmet_1372	NeF		NeF		YP_583524.1	Q1LNM1 Binding-protein-dependent transport systems inner membrane component
Rmet_1373	NeF		NeF		YP_583525.1	Q1LNM0 Aliphatic sulfonates import ATP-binding protein ssuB
Rmet_1374	30.3993		NF/NF		YP_583526.1	Q1LNL9 Putative diguanylate phosphodiesterase (EAL domain)
Rmet_1375	NeF		NeF		YP_583527.1	Q1LNL8 Putative uncharacterized protein
Rmet_1376	NeF		NeF		YP_583528.1	Q1LNL7 Sulfate ABC transporter, permease protein CysT
Rmet_1377	NeF		NeF		YP_583529.1	Q1LNL6 Sulfate ABC transporter, permease protein CysW
Rmet_1378	149.684	102	15.0978		YP_583530.1	Q1LNL5 Sulphate transport system permease protein 1
Rmet_1379	185.309	100.86	191.653	94.124	YP_583531.1	Q1LNL4 Transcriptional regulator, LysR family
Rmet_1380	NeF		NeF		YP_583532.1	Q1LNL3 Histidine kinase internal region
Rmet_1381	47.5983		215.434		YP_583533.1	Q1LNL2 Transcriptional regulator, LytR/AlgR family
Rmet_1382	813.456	163.997	831.804	374.836	YP_583534.1	Q1LNL1 Putative uncharacterized protein
Rmet_1383	83.9823	36.9918	127.443	68.0759	YP_583535.1	Q1LNL0 Putative uncharacterized protein
Rmet_1384	33.7687		NF/NF		YP_583536.1	Q1LNK9 Alpha/beta hydrolase fold
Rmet_1385	65.5199		NF/NF		YP_583537.1	Q1LNK8 Isocitrate lyase
Rmet_1386	NeF		NeF		YP_583538.1	Q1LNK7 Putative uncharacterized protein
Rmet_1387	447.462	80.2357	514.526	174.511	YP_583539.1	Q1LNK6 UspA
Rmet_1388	174.734	83.0161	406.17	8.96699	YP_583540.1	Q1LNK5 Transcriptional regulator, LysR family
Rmet_1389	29.228		NF/NF		YP_583541.1	Q1LNK4 Haloacid dehalogenase, type II
Rmet_1390	1084.88	81.748	1245.67	149.323	YP_583542.1	Q1LNK3 Malate synthase
Rmet_1391	14.5372		NF/NF		YP_583543.1	Q1LNK2 Glyoxalase/bleomycin resistance protein/dioxygenase
Rmet_1392	566.748	103.243	741.465	137.161	YP_583544.1	Q1LNK1 Putative uncharacterized protein
Rmet_1393	NeF		NeF		YP_583545.1	Q1LNK0 Drug resistance transporter EmrB/QacA subfamily
Rmet_1394	559.867	78.6277	949.826	106.766	YP_583546.1	Q1LNJ9 Acyl-coA-binding protein, ACBP
Rmet_1395	127.624	16.1301	128.414	24.1723	YP_583547.1	Q1LNJ8 Peptidase M22, glycoprotease
Rmet_1396	NeF		NeF		YP_583548.1	Q1LNJ7 SSU ribosomal protein S18P alanine acetyltransferase
Rmet_1397	87.6085	17.0759	83.0092	15.3102	YP_583549.1	Q1LNJ6 Phage SPO1 DNA polymerase-related protein
Rmet_1398	28.668	14.0862	51.8181		YP_583550.1	Q1LNJ5 Putative uncharacterized protein
Rmet_1399	NeF		NeF		YP_583551.1	Q1LNJ4 Major facilitator superfamily MFS_1
Rmet_1400	190.236	89.3488	328.548	156.373	YP_583552.1	Q1LNJ3 Alanine racemase
Rmet_1401	170.195	53.2719	148.749	98.1227	YP_583553.1	Q1LNJ2 DNA repair protein radA
Rmet_1402	104.43	0.0523725	NF/NF		YP_583554.1	Q1LNJ1 Putative uncharacterized protein
Rmet_1403	NeF		NeF		YP_583555.1	Q1LNJ0 Disulfide bond formation protein B
Rmet_1404	136.506	34.5286	93.3043	14.6002	YP_583556.1	Q1LNI9 ABC transporter-related protein
Rmet_1405	NF/NF		10.475		YP_583557.1	Q1LNI8 Transcriptional regulator, RpiR family
Rmet_1406	202.373	83.0562	240.621	1.41959	YP_583558.1	Q1LNI7 Asparaginase
Rmet_1407	99.1486	55.1479	NF/NF		YP_583559.1	Q1LNI6 Oligopeptide/dipeptide ABC transporter, ATP-binding protein-like protein
Rmet_1408	746.151	157.063	574.723	34.2095	YP_583560.1	Q1LNI5 Extracellular solute-binding protein, family 5
Rmet_1409	34.7683		NF/NF		YP_583561.1	Q1LNI4 Binding-protein-dependent transport systems inner membrane component
Rmet_1410	NF/NF		19.1295		YP_583562.1	Q1LNI3 Binding-protein-dependent transport systems inner membrane component
Rmet_1411	NF/NF		29.7166	21.4331	YP_583563.1	Q1LNI2 Peptidase S58, DmpA
Rmet_1412	60.2165	32.3454	1018.38		YP_583564.1	Q1LNI1 D-aminopeptidase DppA. Metallo peptidase. MEROPS family M55
Rmet_1413	NeF		NeF		YP_583565.1	Q1LNI0 Putative uncharacterized protein
Rmet_1414	78.9401		NF/NF		YP_583566.1	Q1LNH9 Putative uncharacterized protein
Rmet_1415	NeF		NeF		YP_583567.1	Q1LNH8 Twin-arginine translocation pathway signal
Rmet_1416	NF/NF		100.454		YP_583568.1	Q1LNH7 (2Fe-2S)-binding
Rmet_1417	15.3664		NF/NF		YP_583569.1	Q1LNH6 Cytochrome c, class I
Rmet_1418	132.888	44.187	108.417	49.9735	YP_583570.1	Q1LNH5 Putative integral membrane protein
Rmet_1419	710.533	121.941	802.422	191.017	YP_583571.1	Q1LNH4 Modification methylase, HemK family
Rmet_1420	858.712	41.9258	1112.59	337.77	YP_583572.1	Q1LNH3 Succinyldiaminopimelate desuccinylase
Rmet_1421	214.173	66.3349	338.858	146.307	YP_583573.1	Q1LNH2 Putative uncharacterized protein
Rmet_1422	176.389	97.7721	101.542	13.2988	YP_583574.1	Q1LNH1 Twin-arginine translocation pathway signal
Rmet_1423	2390.19	259.047	2839.39	454.965	YP_583575.1	Q1LNH0 2,3,4,5-tetrahydropyridine-2,6-dicarboxylate N-succinyltransferase
Rmet_1424	618.109	38.9566	485.513	191.38	YP_583576.1	Q1LNG9 Succinyldiaminopimelate aminotransferase
Rmet_1425	33.4495	9.34257	NF/NF		YP_583577.1	Q1LNG8 Putative uncharacterized protein
Rmet_1426	663.884	73.5842	661.145	80.6292	YP_583578.1	Q1LNG7 Condensin subunit Smc
Rmet_1427	306.267	21.7346	89.1089	10.7839	YP_583579.1	Q1LNG6 Conserved hypothetical transmembrane protein
Rmet_1428	502.255	91.9496	480.175	81.3148	YP_583580.1	Q1LNG5 DNA ligase
Rmet_1429	268.785	23.7455	309.597	39.0376	YP_583581.1	Q1LNG4 Peptide deformylase
Rmet_1430	NeF		NeF		YP_583582.1	Q1LNG3 Major facilitator superfamily MFS_1
Rmet_1431	25.0156		72.5423		YP_583583.1	Q1LNG2 Transcriptional regulator, XRE family
Rmet_1432	508.428	28.3558	621.888	44.804	YP_583584.1	Q1LNG1 Pseudouridine synthase, Rsu
Rmet_1433	389.921	4.60116	416.31	47.9209	YP_583585.1	Q1LNG0 [Protein-PII] uridylyltransferase
Rmet_1434	830.955	195.146	1128.79	360.186	YP_583586.1	Q1LNF9 Methionine aminopeptidase
Rmet_1435	6441.43	349.018	6218.22	113.885	YP_583587.1	Q1LNF8 30S ribosomal protein S2
Rmet_1436	4223.7	163.699	4521.44	129.287	YP_583588.1	Q1LNF7 Elongation factor Ts
Rmet_1437	1182.86	206.969	920.375	460.999	YP_583589.1	Q1LNF6 Uridylate kinase
Rmet_1438	2667.83	245.47	3198.42	66.8921	YP_583590.1	Q1LNF5 Ribosome-recycling factor
Rmet_1439	202.816	44.7326	466.831	273.511	YP_583591.1	Q1LNF4 Undecaprenyl pyrophosphate synthetase
Rmet_1440	NeF		NeF		YP_583592.1	Q1LNF3 Phosphatidate cytidylyltransferase
Rmet_1441	570.961	96.203	451.129	258.473	YP_583593.1	Q1LNF2 1-deoxy-D-xylulose 5-phosphate reductoisomerase
Rmet_1442	89.6682	19.7726	60.519	7.06783	YP_583594.1	Q1LNF1 RseP peptidase. Metallo peptidase. MEROPS family M50B
Rmet_1443	936.963	278.804	477.23	106.857	YP_583595.1	Q1LNF0 Surface antigen (D15)
Rmet_1444	2111.43	136.872	2251.67	202.553	YP_583596.1	Q1LNE9 Outer membrane chaperone Skp (OmpH)
Rmet_1445	506.422	25.6986	555.748	27.2987	YP_583597.1	Q1LNE8 UDP-3-O-[3-hydroxymyristoyl] glucosamine N-acyltransferase
Rmet_1446	75.3018	13.8978	175.846	46.2996	YP_583598.1	Q1LNE7 (3R)-hydroxymyristoyl-[acyl-carrier-protein] dehydratase
Rmet_1447	1166.15	67.2264	1413.53	166.647	YP_583599.1	Q1LNE6 Acyl-[acyl-carrier-protein]--UDP-N-acetylglucosamine O-acyltransferase
Rmet_1448	196.421	30.316	193.412	3.76905	YP_583600.1	Q1LNE5 Lipid-A-disaccharide synthase
Rmet_1449	59.6434	37.0244	264.399		YP_583601.1	Q1LNE4 Ribonuclease HII
Rmet_1450	423.916	121.826	301.399	0.969156	YP_583602.1	Q1LNE3 tRNA/rRNA methyltransferase (SpoU)
Rmet_1451	50.4016		NF/NF		YP_583603.1	Q1LNE2 Putative uncharacterized protein
Rmet_1452	611.843	181.769	495.823	152.343	YP_583604.1	Q1LNE1 Putative phosphotransferase Rmet_1452
Rmet_1453	1660.18	302.405	1795.11	358.933	YP_583605.1	Q1LNE0 Phosphoenolpyruvate synthase
Rmet_1454	NeF		NeF		YP_583606.1	Q1LND9 Putative uncharacterized protein
Rmet_1455	528.624	122.706	289.117	188.653	YP_583607.1	Q1LND8 SPFH domain, Band 7 family protein
Rmet_1456	385.875	69.4959	406.903	26.1102	YP_583608.1	Q1LND7 SsrA-binding protein
Rmet_1457	204.902	19.4784	203.783	21.375	YP_583609.1	Q1LND6 Cyclase/dehydrase
Rmet_1458	62.9471		74.2423	0.336243	YP_583610.1	Q1LND5 Putative uncharacterized protein
Rmet_1459	433.949	13.6275	83.1124	34.5483	YP_583611.1	Q1LND4 Putative transmembrane protein
Rmet_1460	NeF		NeF		YP_583612.1	Q1LND3 Putative transmembrane protein
Rmet_1461	2977.94	273.474	3486.14	131.712	YP_583613.1	Q1LND2 Inosine-5'-monophosphate dehydrogenase
Rmet_1462	44.9389	12.5231	NF/NF		YP_583614.1	Q1LND1 Putative transmembrane protein
Rmet_1463	1421.01	253.583	1737.81	437.523	YP_583615.1	Q1LND0 GMP synthase (Glutamine-hydrolyzing)
Rmet_1464					NPDB	Q1LNC9 Putative uncharacterized protein
Rmet_1465	107.967	28.7751	247.51		YP_583617.1	Q1LNC8 Phage integrase
Rmet_1466	NeF		NeF		YP_583618.1	Q1LNC7 Putative uncharacterized protein
Rmet_1467	46.2741		NF/NF		YP_583619.1	Q1LNC6 Prophage CP4-57 regulatory
Rmet_1468	NF/NF		38.1444		YP_583620.1	Q1LNC5 Phage transcriptional regulator, AlpA
Rmet_1469	246.389	92.2334	101.88		YP_583621.1	Q1LNC4 TatD-related deoxyribonuclease
Rmet_1470	245.541	6.30914	258.503	171.815	YP_583622.1	Q1LNC3 Putative uncharacterized protein
Rmet_1471	NF/NF		NF/NF		YP_583623.1	Q1LNC2 Putative uncharacterized protein
Rmet_1472	758.102	117.991	136.402	25.3296	YP_583624.1	Q1LNC1 KAP P-loop
Rmet_1473	254.931	38.7522	NF/NF		YP_583625.1	Q1LNC0 Retron reverse transcriptase
Rmet_1474	NeF		NeF		YP_583626.1	Q1LNB9 Putative uncharacterized protein
Rmet_1475	NeF		NeF		YP_583627.1	Q1LNB8 Putative uncharacterized protein
Rmet_1476	NeF		NeF		YP_583628.1	Q1LNB7 Putative uncharacterized protein
Rmet_1477	734.652	359.108	964.35	110.334	YP_583629.1	Q1LNB6 Putative uncharacterized protein
Rmet_1478	NeF		NeF		YP_583630.1	Q1LNB5 ParB family protein
Rmet_1479	74.672	27.3868	116.932	51.5739	YP_583631.1	Q1LNB4 Putative uncharacterized protein
Rmet_1480	NF/NF		309.55		YP_583632.1	Q1LNB3 Putative uncharacterized protein
Rmet_1481	30.0862		81.2664	0.0662599	YP_583633.1	A9IL07 Predicted transcriptional regulator
Rmet_1482	NeF		NeF		YP_583634.1	Q1LNB1 Putative lipoprotein
Rmet_1483	NeF		NeF		YP_583635.1	Q1LNB0 Putative uncharacterized protein
Rmet_1484	NeF		NeF		YP_583636.1	Q1LNA9 Putative uncharacterized protein
Rmet_1485	NeF		NeF		YP_583637.1	Q1LNA8 Conserved hypothetical replication initiator and transcription repressor protein
Rmet_1486	NQ/NF		NF/NF		YP_583638.1	Q1LNA7 Cobyrinic acid a,c-diamide synthase
Rmet_1487	NF/NF		NF/NF		YP_583639.2	Q1LNA6 Putative uncharacterized protein
Rmet_1488	NeF		NeF		YP_583640.1	Q1LNA5 TraF peptidase. Serine peptidase. MEROPS family S26C
Rmet_1489	NF/NF		75.5506		YP_583641.1	Q1LNA4 Putative uncharacterized protein
Rmet_1490	NeF		NeF		YP_583642.1	Q1LNA3 Transcriptional regulator, AraC family
Rmet_1491	154.461	137.058	NF/NF		YP_583643.1	Q6SKD6 Transposase
Rmet_1492	NeF		NeF		YP_583644.1	Q1LNA1 Fructose-bisphosphate aldolase
Rmet_1493					NPDB	Q1LNA0 Putative uncharacterized protein
Rmet_1494					NPDB	Q1LN99 Putative uncharacterized protein
Rmet_1495					NPDB	Q1LN98 Putative uncharacterized protein
Rmet_1496	NF/NF		NF/NF		YP_583648.1	Q1LN97 Putative uncharacterized protein
Rmet_1497	NF/NF		143.504	10.2385	YP_583649.1	Q1LN96 Putative uncharacterized protein
Rmet_1498	NF/NF		169.264	38.1068	YP_583650.1	Q1LN95 von Willebrand factor, type A
Rmet_1499	NF/NF		432.64	315.373	YP_583651.1	Q1LN94 ATPase associated with various cellular activities, AAA_5
Rmet_1500	NF/NF		1688.97	1619.44	YP_583652.1	Q1LN93 Ribulose bisphosphate carboxylase small chain
Rmet_1501	69.5999		6269.19	139.106	YP_583653.1	Q1LN92 Ribulose bisphosphate carboxylase large chain
Rmet_1502	NF/NF		289.67		YP_583654.1	Q1LN91 Transcriptional regulator, LysR family
Rmet_1503	NF/NF		NF/NQ		YP_583655.1	Q9RBF5 Ralstonia eutropha insertion sequence IS1090
Rmet_1504					NPDB	Q1LN89 Putative uncharacterized protein
Rmet_1505					NPDB	Q1LN88 ISSod11, transposase
Rmet_1506	NF/NQ		NF/NF		YP_583658.1	Q6SKD6 Transposase
Rmet_1507	NeF		NeF		YP_583659.1	Q1LN86 D-fructose 1,6-bisphosphatase
Rmet_1508	NF/NF		46.9814		YP_583660.1	Q1LN85 Transcriptional regulator, LysR family
Rmet_1509					NPDB	Q1LN84 Putative uncharacterized protein
Rmet_1510	NF/NF		31.6561		YP_583662.1	Q1LN83 Ribulose-5-phosphate 3-epimerase
Rmet_1511	NF/NF		237.115	199.662	YP_583663.1	Q1LN82 D-fructose 1,6-bisphosphatase
Rmet_1512	NF/NF		531.433	22.7037	YP_583664.1	Q1LN81 Phosphoribulokinase
Rmet_1513	NF/NF		327.371	150.618	YP_583665.1	Q1LN80 Transketolase
Rmet_1514	163.343		119.982	24.2504	YP_583666.1	Q1LN79 Phosphoglycolate phosphatase
Rmet_1515	62.4441	16.3863	573.494	497.23	YP_583667.1	Q1LN78 Glyceraldehyde-3-phosphate dehydrogenase
Rmet_1516	276.617	189.511	150.895	28.3686	YP_583668.1
Rmet_1517	NF/NF		60.5439		YP_583669.1	Q1LN76 HAD-superfamily hydrolase subfamily IA, variant 3
Rmet_1518	68.0886	33.1869	190.524	129.799	YP_583670.1	Q1LN75 Fructose-bisphosphate aldolase
Rmet_1519	NeF		NeF		YP_583671.1	Q1LN74 Pyruvate kinase
Rmet_1520	NF/NF		101.277	12.6203	YP_583672.1	Q1LN73 Triosephosphate isomerase
Rmet_1521	NF/NF		76.4365	13.7853	YP_583673.1	Q1LN72 Ribose-5-phosphate isomerase
Rmet_1522	NF/NF		1694.21	1662.2	YP_583674.1	Q1LN71 Respiratory-chain NADH dehydrogenase domain, 51 kDa subunit
Rmet_1523	NF/NF		1098.46	988.508	YP_583675.1	Q1LN70 Ferredoxin
Rmet_1524	NF/NF		1854.56	67.3005	YP_583676.1	Q1LN69 NADH ubiquinone oxidoreductase, 20 kDa subunit
Rmet_1525	33.6964		4610.69	84.1668	YP_583677.1	Q1LN68 Nickel-dependent hydrogenase, large subunit
Rmet_1526	NF/NF		1765.93	36.8367	YP_583678.1	Q1LN67 HoxW protein
Rmet_1527	NF/NF		8604.71	318.777	YP_583679.1	Q1LN66 Cyclic nucleotide-binding domain (CNMP-BD) protein
Rmet_1528					NPDB	Q1LN65 Alanine dehydrogenase/PNT-like protein
Rmet_1529	NF/NF		372.59	48.9387	YP_583681.1	Q1LB62 Integrase, catalytic region
Rmet_1530					NPDB	Q1LN63 Alanine dehydrogenase/PNT-like protein
Rmet_1531					NPDB	Q1LN62 Pyridine nucleotide transhydrogenase subunit alpha
Rmet_1532	NeF		NeF		YP_583684.1	Q1LN61 NAD(P) transhydrogenase, beta subunit
Rmet_1533	NeF		NeF		YP_583685.1	Q1LN60 High-affinity nickel-transporter
Rmet_1534					NPDB	Q1LN59 Putative uncharacterized protein
Rmet_1535	NF/NF		622.176	77.3396	YP_583687.1	Q1LN58 Hydrogenase nickel insertion protein HypA
Rmet_1536	NF/NF		5295.4	248.717	YP_583688.1	Q1LN57 Hydrogenase accessory protein HypB
Rmet_1537	NF/NF		504.128	33.339	YP_583689.1	Q1LN56 (NiFe) hydrogenase maturation protein HypF
Rmet_1538	NeF		NeF		YP_583690.1	Q1LN55 Hydrogenase assembly chaperone hypC/hupF
Rmet_1539	NF/NF		492.957	29.2577	YP_583691.1	Q1LN54 Hydrogenase expression/formation protein HypD
Rmet_1540	NF/NF		2965.32	148.769	YP_583692.1	Q1LN53 Hydrogenase expression/formation protein HypE
Rmet_1541	NF/NF		370.856	61.3717	YP_583693.1	Q1LN52 Formyl transferase-like protein
Rmet_1542	608.479	40.7109	240.158		YP_583694.1	Q1LN51 Response regulator receiver domain protein (CheY-like)
Rmet_1543	NF/NQ		NF/NF		YP_583696.1	Q1LN50 Stress responsive alpha-beta barrel
Rmet_1545	NeF		NeF		YP_583697.1	Q1LN48 Putative uncharacterized protein
Rmet_1546	NeF		NeF		YP_583698.1	Q1LN47 Transcriptional regulator, LysR family
Rmet_1547	NeF		NeF		YP_583699.1	Q1LN46 Putative lipoprotein
Rmet_1548	NeF		NeF		YP_583700.1	Q1LN45 TRAG protein
Rmet_1550	NQ/NQ		NQ/NF		YP_583702.1	Q1LN43 Type II secretion system protein E
Rmet_1551	NeF		NeF		YP_583703.1	A6V7M4 Conjugal transfer protein TrbC
Rmet_1552	NeF		NeF		YP_583704.1	Q1LN41 Putative conjugal transfer trbD transmembrane protein
Rmet_1553	NF/NF		132.738		YP_583705.1	Q1LN40 ATPase
Rmet_1554	NeF		NeF		YP_583706.1	Q1LN39 Putative conjugal transfer TrbJ signal peptide protein
Rmet_1555	NeF		NeF		YP_583707.1	Q1LN38 Putative lipoprotein
Rmet_1556	NeF		NeF		YP_583708.1	Q1LN37 TrbL/VirB6 plasmid conjugal transfer protein
Rmet_1557	NeF		NeF		YP_583709.1	Q1LN36 Conjugal transfer protein
Rmet_1558	NeF		NeF		YP_583710.1	Q1LN35 Conjugal transfer protein TrbG/VirB9/CagX
Rmet_1559	21.032		NF/NF		YP_583711.1	Q1LN34 Conjugation TrbI-like protein
Rmet_1560	NeF		NeF		YP_583712.1	Q1LN33 Putative uncharacterized protein
Rmet_1561	393.654	15.2083	NF/NF		YP_583713.2	Q1LN32 Putative uncharacterized protein
Rmet_1562	NF/NF		92.0783	49.8827	YP_583714.1	Q1LN31 Putative uncharacterized protein
Rmet_1563	NeF		NeF		YP_583715.1	Q1LN30 ISRSO11-transposase orfA protein
Rmet_1564	NeF		NeF		YP_583716.1	Q1LN29 Integrase, catalytic region
Rmet_1565	NeF		NeF		YP_583717.1	Q1LN28 FAD dependent oxidoreductase
Rmet_1566	NeF		NeF		YP_583718.1	Q1LN27 Alpha/beta hydrolase fold
Rmet_1567	NF/NF		NF/NF		YP_583719.1	Q1LN26 Transcriptional regulator, TetR family
Rmet_1568	75.2985	16.9654	100.276	45.6519	YP_583720.1	Q1LN25 Transcriptional regulator
Rmet_1569	146.495	10.5093	70.6912	38.8324	YP_583721.1	Q1LN24 Putative uncharacterized protein
Rmet_1570	1259.31	1027.02	566.292	378.288	YP_583722.1	Q1LN23 Putative uncharacterized protein
Rmet_1571	255.259	144.813	86.0828	9.94618	YP_583723.1	Q1LN22 Putative uncharacterized protein
Rmet_1572	79.2931	19.0651	137.257	30.149	YP_583724.1	Q1LN21 Putative uncharacterized protein
Rmet_1573	110.939	76.7425	40.8647	8.70714	YP_583725.1	Q1LN20 tRNA-adenosine deaminase
Rmet_1574	392.076	126.312	472.535	177.913	YP_583726.1	Q1LN19 Peptidase U61, LD-carboxypeptidase A
Rmet_1575	542.276	25.6987	573.182	55.3074	YP_583727.1	Q1LN18 ABC transporter-related protein
Rmet_1576	71.7705	5.98625	49.2231		YP_583728.1	Q1LN17 Putative proline-rich protein
Rmet_1577	2035.71	274.985	1723.27	117.038	YP_583729.1	Q1LN16 Aldehyde dehydrogenase
Rmet_1578	195.291	141.695	NF/NF		YP_583730.1	Q1LN15 Peptidase S45, penicillin amidase
Rmet_1579	84.6856	8.25882	70.5039	11.5258	YP_583731.1	Q1LN14 Glutamine amidotransferase class-I
Rmet_1580	NeF		NeF		YP_583732.1	Q1LN13 MOSC domain protein
Rmet_1581	66.3166	13.5273	90.9661	27.4129	YP_583733.1	Q1LN12 Putative uncharacterized protein
Rmet_1582	NeF		NeF		YP_583734.1	Q1LN11 Phenylacetic acid degradation-related protein
Rmet_1583	3455.77	34.5965	3637.24	166.839	YP_583735.1	Q1LN10 Asparaginase
Rmet_1584	219.394	37.6397	269.085	27.7413	YP_583736.1	Q1LN09 Methylitaconate delta2-delta3-isomerase
Rmet_1585	569.849	78.331	581.04	53.489	YP_583737.1	Q1LN08 Aconitase
Rmet_1586	1221.01	454.289	1444.4	604.215	YP_583738.1	Q1LN07 2-methylcitrate synthase
Rmet_1587	270.993	44.9675	325.446	35.9836	YP_583739.1	Q1LN06 2,3-dimethylmalate lyase
Rmet_1588	58.992		NF/NF		YP_583740.1	Q1LN05 Putative PAS/PAC sensor protein
Rmet_1589	28.8908		31.3916	16.9847	YP_583741.1	Q1LN04 Putative uncharacterized protein
Rmet_1590	38.8603		137.289		YP_583742.1	Q1LN03 NAD(P)H dehydrogenase (Quinone)
Rmet_1591					NPDB	Q1LN02 Transcriptional regulator, LysR family
Rmet_1592	NF/NF		NQ/NQ		YP_583744.1
Rmet_1593					NPDB	Q1LN00 Transcriptional regulatory protein
Rmet_1594	NeF		NeF		YP_583746.1	Q1LMZ9 DoxX
Rmet_1595	NeF		NeF		YP_583747.1	Q1LMZ8 Putative lipoprotein
Rmet_1596	NeF		NeF		YP_583748.1	Q1LMZ7 DNA translocase FtsK
Rmet_1597	30.5088		NF/NF		YP_583749.1	Q1LMZ6 Cupin 2, conserved barrel
Rmet_1598	212.87		329.833	381.177	YP_583750.1	Q1LMZ5 Substrate-binding region of ABC-type glycine betaine transport system
Rmet_1599	36.3461	10.0478	NF/NF		YP_583751.1	Q1LMZ4 Cytochrome c, class I
Rmet_1600	379.291	203.275	321.189	174.315	YP_583752.1	Q1LMZ3 Twin-arginine translocation pathway signal
Rmet_1601	74.9389		67.9124		YP_583753.1	Q1LMZ2 Transcriptional regulator, MarR family
Rmet_1602	NeF		NeF		YP_583754.1	Q1LMZ1 Glyceraldehyde 3-phosphate dehydrogenase
Rmet_1603	NF/NF		NF/NF		YP_583755.1	Q1LMZ0 Alkylhydroperoxidase AhpD core
Rmet_1604	NeF		NeF		YP_583756.1	Q1LMY9 Transcriptional regulator, AraC family
Rmet_1605	NeF		NeF		YP_583757.1	Q1LMY8 Transcriptional regulator, LysR family
Rmet_1606	NeF		NeF		YP_583758.1	Q1LMY7 LrgA
Rmet_1607	NeF		NeF		YP_583759.1	Q1LMY6 LrgB-like protein
Rmet_1608	49.6813	5.62975	94.7345	42.1556	YP_583760.1	Q1LMY5 FAD linked oxidase-like protein
Rmet_1609	79.2502		NF/NF		YP_583761.1	Q1LMY4 Transcriptional regulator, GntR family
Rmet_1610	NeF		NeF		YP_583762.1	Q1LMY3 Acetylornithine deacetylase or succinyl-diaminopimelate desuccinylase
Rmet_1611					NPDB	Q1LMY2 Extracellular solute-binding protein, family 5
Rmet_1612	NeF		NeF		YP_583764.1	B2UH78 Integrase catalytic region
Rmet_1613	NQ/NQ		NQ/NQ		YP_583765.1	Q58AB8 OrfA protein (Transposase IS3/IS911)
Rmet_1614					NPDB	Q1LMX9 Putative solute-binding transport protein (Periplasmic)
Rmet_1615	NeF		NeF		YP_583767.1	Q1LMX8 Binding-protein-dependent transport systems inner membrane component
Rmet_1616	NeF		NeF		YP_583768.1	Q1LMX7 Binding-protein-dependent transport systems inner membrane component
Rmet_1617	NeF		NeF		YP_583769.1	Q1LMX6 ABC transporter-related protein
Rmet_1618	NeF		NeF		YP_583770.1	Q1LMX5 4-aminobutyrate aminotransferase
Rmet_1619	NeF		NeF		YP_583771.1	Q1LMX4 Putative uncharacterized protein
Rmet_1620	NeF		NeF		YP_583772.1	Q1LMX3 Thiamine pyrophosphate enzyme-like TPP binding region
Rmet_1621	NeF		NeF		YP_583773.1	Q1LMX2 Histone deacetylase superfamily
Rmet_1622	38.2076	0.583453	20.0669		YP_583774.1	Q1LMX1 Amidase, hydantoinase/carbamoylase
Rmet_1623	NeF		NeF		YP_583775.1	Q1LMX0 Aldehyde dehydrogenase (Acceptor)
Rmet_1624	NeF		NeF		YP_583776.1	Q1LMW9 Drug resistance transporter EmrB/QacA subfamily
Rmet_1625	38.8633		92.6855	52.8471	YP_583777.1	Q1LMW8 Transcriptional regulator, MarR family
Rmet_1626	40.0707		NF/NF		YP_583778.1	Q1LMW7 Sensor protein
Rmet_1627	59.0377	27.2893	NF/NF		YP_583779.1	Q1LMW6 Two component transcriptional regulator, winged helix family
Rmet_1628	NeF		NeF		YP_583780.1	Q1LMW5 Porin, Gram-negative type
Rmet_1629	NeF		NeF		YP_583781.1	Q1LMW4 Glutathione-dependent formaldehyde-activating, GFA
Rmet_1630	NeF		NeF		YP_583782.1	Q1LMW3 Sodium/hydrogen exchanger
Rmet_1631	NeF		NeF		YP_583783.1	Q1LMW2 Transcriptional regulator, LysR family
Rmet_1632	401.323	43.2004	473.641	42.0051	YP_583784.1	Q1LMW1 2-hydroxy-3-oxopropionate reductase
Rmet_1633	187.895	55.0209	187.746	24.1258	YP_583785.1	Q1LMW0 5-dehydro-4-deoxy-D-glucarate aldolase
Rmet_1634	274.115	94.9593	306.176	73.9758	YP_583786.1	Q1LMV9 Malate/L-lactate dehydrogenase
Rmet_1635	245.306	57.7417	114.005	66.5498	YP_583787.1	Q1LMV8 Uncharacterized protein UPF0065
Rmet_1636	157.703	8.02163	151.393	48.552	YP_583788.1	Q1LMV7 Thiamine pyrophosphate enzyme-like TPP-binding
Rmet_1637	NF/NF		176.406		YP_583789.1	Q1LMV6 Putative uncharacterized protein
Rmet_1638	NeF		NeF		YP_583790.1	Q1LMV5 Pyruvate carboxylase
Rmet_1639	NeF		NeF		YP_583791.1	Q1LMV4 Porin, Gram-negative type
Rmet_1640	91.1683	11.1113	48.8609	7.45326	YP_583792.1	Q1LMV3 Putative UreA/short-chain amide ABC transporter
Rmet_1641	255.745	9.05834	216.667	21.4864	YP_583793.1	Q1LMV2 Putative uncharacterized protein
Rmet_1642	84.692		NF/NF		YP_583794.1	Q1LMV1 Putative uncharacterized protein
Rmet_1643	NeF		NeF		YP_583795.1	Q1LMV0 Putative uncharacterized protein
Rmet_1644	324.659	37.5369	298.396	56.6542	YP_583796.1	Q1LMU9 Beta-lactamase-like protein
Rmet_1645	488.678		187.317		YP_583797.1	Q1LMU8 DNA polymerase
Rmet_1646	35.3193	19.6092	NF/NF		YP_583798.1	Q1LMU7 MscS Mechanosensitive ion channel
Rmet_1647	NeF		NeF		YP_583799.1	Q1LMU6 Putative transmembrane protein
Rmet_1648	NeF		NeF		YP_583800.1	Q1LMU5 Sigma-24 (FecI-like)
Rmet_1649	23.479		NF/NF		YP_583801.1	Q1LMU4 Putative uncharacterized protein
Rmet_1650	NeF		NeF		YP_583802.1	Q1LMU3 Inner membrane CreD
Rmet_1651	NeF		NeF		YP_583803.1	Q1LMU2 Sensor protein
Rmet_1652	NeF		NeF		YP_583804.1	Q1LMU1 Two component transcriptional regulator, winged helix family
Rmet_1653	NeF		NeF		YP_583805.1	Q1LMU0 Monooxygenase, FAD-binding
Rmet_1654	NeF		NeF		YP_583806.1	Q1LMT9 SmpA/OmlA
Rmet_1655	NeF		NeF		YP_583807.1	Q1LMT8 Putative uncharacterized protein
Rmet_1656	84.2055	6.36017	108.996	39.2682	YP_583808.1	Q1LMT7 Glutathione S-transferase-like protein
Rmet_1657	NeF		NeF		YP_583809.1	Q1LMT6 Putative uncharacterized protein
Rmet_1658	NF/NF		35.4874		YP_583810.1	Q1LMT5 Putative uncharacterized protein
Rmet_1659	NeF		NeF		YP_583811.1	Q1LMT4 Addiction module toxin, Txe/YoeB
Rmet_1660	NeF		NeF		YP_583812.1	Q1LMT3 Transposase and inactivated derivatives-like protein
Rmet_1663	NeF		NeF		YP_583813.1	Q1LMT2 Pili assembly chaperone
Rmet_1664	NeF		NeF		YP_583814.1	Q1LMT1 Putative uncharacterized protein
Rmet_1665	1692.54		NF/NF		YP_583815.1	Q1LMT0 Fimbrial biogenesis outer membrane usher protein
Rmet_1666	NeF		NeF		YP_583816.1	Q1LMS9 Pili assembly chaperone
Rmet_1667	NeF		NeF		YP_583817.1	Q1LMS8 Fimbrial protein
Rmet_1668	NeF		NeF		YP_583818.1	Q1LMS7 Transposase and inactivated derivatives-like protein
Rmet_1669	NeF		NeF		YP_583819.1	Q1LMS6 Dipeptidyl aminopeptidase/acylaminoacyl-peptidase
Rmet_1670	NeF		NeF		YP_583820.1	Q1LMS5 Putative uncharacterized protein
Rmet_1671	NeF		NeF		YP_583821.1	Q1LMS4 Poly(R)-hydroxyalkanoic acid synthase, class I
Rmet_1672	NeF		NeF		YP_583822.1	Q1LMS3 MaoC-like dehydratase
Rmet_1673	NeF		NeF		YP_583823.1	Q1LMS2 Putative uncharacterized protein
Rmet_1674	NeF		NeF		YP_583824.1	Q1LMS1 Membrane protein-like protein
Rmet_1675	NeF		NeF		YP_583825.1	Q1LMS0 Putative transmembrane protein
Rmet_1676	229.826	56.2796	NF/NF		YP_583826.1	Q1LMR9 UspA
Rmet_1677	91.3147	45.2219	114.479	2.2322	YP_583827.1	Q1LMR8 UspA
Rmet_1678	NeF		NeF		YP_583828.1	Q1LMR7 Putative uncharacterized protein
Rmet_1679					NPDB	Q1LMR6 Phage integrase
Rmet_1680	NeF		NeF		YP_583830.1	Q1LMR5 Putative uncharacterized protein
Rmet_1681	303.049	112.78	401.362	228.037	YP_583831.1	Q1LMR4 3-deoxy-D-arabinoheptulosonate-7-phosphate synthase
Rmet_1682	NeF		NeF		YP_583832.1	Q1LMR3 Major facilitator superfamily MFS_1
Rmet_1683	NF/NF		223.657		YP_583833.1	Q1LMR2 ABC-type multidrug transport system permease component
Rmet_1684	113.545	25.3688	288.903	143.366	YP_583834.1	Q1LMR1 Response regulator receiver domain protein (CheY-like)
Rmet_1685	242.642	27.9664	40.0727	2.63906	YP_583835.1	Q1LMR0 Secretion protein HlyD
Rmet_1686	76.2638	28.4662	56.8179	53.8374	YP_583836.1	Q1LMQ9 RND efflux system, outer membrane lipoprotein, NodT
Rmet_1687	NeF		NeF		YP_583837.1	Q1LMQ8 Putative uncharacterized protein
Rmet_1688	283.374		NF/NF		YP_583838.1	Q1LMQ7 Diguanylate cyclase (GGDEF domain) with PAS/PAC sensor
Rmet_1689	119.202		NF/NF		YP_583839.1	Q1LMQ6 Diguanylate phosphodiesterase (EAL domain)
Rmet_1690	NeF		NeF		YP_583840.1	Q1LMQ5 Flagellar transcriptional activator
Rmet_1691	NeF		NeF		YP_583841.1	Q1LMQ4 Flagellar transcriptional activator FlhC
Rmet_1692	149.353	88.4291	666.256	832.969	YP_583842.1	Q1LMQ3 Transcriptional regulator, Crp/Fnr family
Rmet_1693	NF/NF		2044.83		YP_583843.1	Q1LMQ2 Methyl-accepting chemotaxis sensory transducer
Rmet_1694	NeF		NeF		YP_583844.1	Q1LMQ1 Putative uncharacterized protein
Rmet_1695	197.176	177.815	291.055	93.3759	YP_583845.1	Q1LMQ0 Putative uncharacterized protein
Rmet_1696	108.82	37.8392	394.378	417.812	YP_583846.1	Q1LMP9 Putative uncharacterized protein
Rmet_1697	NeF		NeF		YP_583847.1	Q1LMP8 Sensor protein
Rmet_1698	NeF		NeF		YP_583848.1	Q1LMP7 Two component transcriptional regulator, LuxR family
Rmet_1699	NeF		NeF		YP_583849.1	Q1LMP6 Response regulator receiver domain protein (CheY-like)
Rmet_1700	343.112	157.066	166.642	2.32757	YP_583850.1	Q1LMP5 Putative uncharacterized protein
Rmet_1701	433.943	12.667	166.24	106.483	YP_583851.1	Q1LMP4 Secretion protein HlyD
Rmet_1702	226.202	138.178	36.9539		YP_583852.1	Q1LMP3 Hydrophobe/amphiphile efflux-1 HAE1
Rmet_1703	NeF		NeF		YP_583853.1	Q1LMP2 RND efflux system, outer membrane lipoprotein, NodT
Rmet_1704	392.275	277.808	156.44	48.3967	YP_583854.1	Q1LMP1 Putative uncharacterized protein
Rmet_1705	1360.12	405.726	576.266	520.517	YP_583855.1	Q1LMP0 Putative uncharacterized protein
Rmet_1706	407.711	201.636	312.272	81.1992	YP_583856.1	Q1LMN9 Putative uncharacterized protein
Rmet_1707	NeF		NeF		YP_583857.1	Q1LMN8 Putative uncharacterized protein
Rmet_1708	NeF		NeF		YP_583858.1	Q1LMN7 Putative uncharacterized protein
Rmet_1709	NeF		NeF		YP_583859.1	Q1LMN6 Putative uncharacterized protein
Rmet_1710	NeF		NeF		YP_583860.1	Q1LMN5 RND efflux system, outer membrane lipoprotein, NodT
Rmet_1711	NeF		NeF		YP_583861.1	Q1LMN4 Secretion protein HlyD
Rmet_1712	NeF		NeF		YP_583862.1	Q1LMN3 Membrane protein, putative
Rmet_1713	NeF		NeF		YP_583863.1	Q1LMN2 Ion transport 2
Rmet_1714	476.018	146.754	146.638	85.6594	YP_583864.1	Q1LMN1 Putative uncharacterized protein
Rmet_1715	28.0703	16.3069	NF/NF		YP_583865.1	Q1LMN0 Transcriptional regulator, AraC family
Rmet_1716	NeF		NeF		YP_583866.1	Q1LMM9 Alcohol dehydrogenase, zinc-binding
Rmet_1717	14.8163	2.08871	NF/NF		YP_583867.1	Q1LMM8 Taurine catabolism dioxygenase TauD/TfdA
Rmet_1718	37.3157		NF/NF		YP_583868.1	Q1LMM7 AMP-dependent synthetase and ligase
Rmet_1719	395.015	114.321	24.6601		YP_583869.1	Q1LMM6 Uncharacterized protein UPF0065
Rmet_1720	NeF		NeF		YP_583870.1	Q1LMM5 Transcriptional regulator, IclR family
Rmet_1721	NeF		NeF		YP_583871.1	Q1LMM4 Carboxyl transferase
Rmet_1722	NeF		NeF		YP_583872.1	Q1LMM3 Acyl-CoA dehydrogenase-like protein
Rmet_1723	NF/NF		NF/NF		YP_583873.1	Q1LMM2 Enoyl-CoA hydratase/isomerase
Rmet_1724	262.068		61.87		YP_583874.1	Q1LMM1 Carbamoyl-phosphate synthase L chain, ATP-binding
Rmet_1725	NeF		NeF		YP_583875.1	Q1LMM0 Putative uncharacterized protein
Rmet_1726	NeF		NeF		YP_583876.1	Q1LML9 Uncharacterized protein UPF0065
Rmet_1727	509.002		260.658	94.3656	YP_583877.1	Q1LML8 L-carnitine dehydratase/bile acid-inducible protein F
Rmet_1728					NPDB	Q46NG6 General substrate transporter:Major facilitator superfamily MFS_1
Rmet_1730	NF/NF		NF/NF		YP_583878.1	Q1LML7 Putative uncharacterized protein
Rmet_1731	64.0868		NF/NF		YP_583879.1	Q1LML6 Putative uncharacterized protein
Rmet_1732	132.221	18.3142	NF/NF		YP_583880.1	Q1LML5 Transcriptional regulator, AraC family
Rmet_1733	NeF		NeF		YP_583881.1	Q1LML4 Porin, Gram-negative type
Rmet_1734	NeF		NeF		YP_583882.1	Q1LML3 Putative uncharacterized protein
Rmet_1735	NeF		NeF		YP_583883.1	Q1LML2 Major facilitator superfamily MFS_1
Rmet_1736	39.9744	1.68626	NF/NF		YP_583884.1	Q1LML1 Cytochrome B561
Rmet_1737	NF/NF		63.9716	14.7519	YP_583885.1	Q1LML0 RND efflux system, outer membrane lipoprotein, NodT
Rmet_1738	NeF		NeF		YP_583886.1	Q1LMK9 Glycosyl transferase, family 2
Rmet_1739	NF/NF		659.356		YP_583887.1	Q1LMK8 Putative uncharacterized protein
Rmet_1740	NeF		NeF		YP_583888.1	Q1LMK7 Putative membrane protein
Rmet_1741	436.49	32.4505	442.439	56.0388	YP_583889.1	Q1LMK6 UspA
Rmet_1742	NeF		NeF		YP_583890.1	Q1LMK5 Putative uncharacterized protein
Rmet_1743	17.0725		NF/NF		YP_583891.1	Q1LMK4 Transcriptional regulator, AraC family
Rmet_1744	NF/NF		61.6481		YP_583892.1	Q1LMK3 AMP-dependent synthetase and ligase
Rmet_1745	NF/NF		NF/NF		YP_583893.1	Q1LMK2 Putative uncharacterized protein
Rmet_1746	NeF		NeF		YP_583894.1	Q1LMK1 Putative transposase protein
Rmet_1747	NeF		NeF		YP_583895.1	Q1LMK0 Putative uncharacterized protein
Rmet_1748	NeF		NeF		YP_583896.1	Q1LMJ9 RND efflux system, outer membrane lipoprotein, NodT
Rmet_1749	NeF		NeF		YP_583897.1	Q1LMJ8 Secretion protein HlyD
Rmet_1750	NeF		NeF		YP_583898.1	Q1LMJ7 Acriflavin resistance protein
Rmet_1751	NeF		NeF		YP_583899.1	Q1LMJ6 Two component heavy metal response transcriptional regulator, winged helix family
Rmet_1752	NeF		NeF		YP_583900.1	Q1LMJ5 Sensor protein
Rmet_1753	NeF		NeF		YP_583901.1	Q1LMJ4 Putative uncharacterized protein
Rmet_1754	NeF		NeF		YP_583902.1	Q1LMJ3 Putative uncharacterized protein
Rmet_1755	NeF		NeF		YP_583903.1	Q1LMJ2 Twin-arginine translocation pathway signal
Rmet_1756	141.187		NF/NF		YP_583904.1	Q1LMJ1 L-carnitine dehydratase/bile acid-inducible protein F
Rmet_1757	NeF		NeF		YP_583905.1	Q1LMJ0 Transcriptional regulator, LysR family
Rmet_1758	NeF		NeF		YP_583906.1	Q1LMI9 Putative uncharacterized protein
Rmet_1759	NeF		NeF		YP_583907.1	Q1LMI8 ABC transporter-related protein
Rmet_1760	NeF		NeF		YP_583908.1	Q1LMI7 Alpha/beta hydrolase fold
Rmet_1761	NeF		NeF		YP_583909.1	Q1LMI6 Putative uncharacterized protein
Rmet_1762	NeF		NeF		YP_583910.1	Q1LMI5 Integral membrane protein TerC
Rmet_1763	609.353	60.2577	100.25		YP_583911.1	Q1LMI4 Putative uncharacterized protein
Rmet_1764	83.4464		NF/NF		YP_583912.1	Q1LMI3 Putative uncharacterized protein
Rmet_1765	213.676		NF/NF		YP_583913.1	Q1LMI2 Putative uncharacterized protein
Rmet_1766	1046.07	387.026	898.415	596.293	YP_583914.1	Q1LMI1 Glutamate decarboxylase
Rmet_1767	NF/NF		NF/NF		YP_583915.1	Q1LMI0 Transcriptional regulator, LysR family
Rmet_1768	NeF		NeF		YP_583916.1	Q1LMH9 N-acetyl-gamma-glutamyl-phosphate reductase
Rmet_1769	703.407	112.348	347.189	1.78651	YP_583917.1	Q1LMH8 Uncharacterized protein UPF0065
Rmet_1770	372.154	57.0065	403.421	16.2213	YP_583918.1	Q1LMH7 Amidase
Rmet_1771	NeF		NeF		YP_583919.1	Q1LMH6 Putative lipoprotein
Rmet_1772	NeF		NeF		YP_583920.1	Q1LMH5 GCN5-related N-acetyltransferase
Rmet_1773	NeF		NeF		YP_583921.1	Q1LMH4 Glyoxalase/bleomycin resistance protein/dioxygenase
Rmet_1774	NeF		NeF		YP_583922.1	Q1LMH3 Transcriptional regulator, LysR family
Rmet_1775	954.796	747.975	21.4527		YP_583923.1	Q1LMH2 FAD linked oxidase-like protein
Rmet_1776	134.133	2.75177	50.0466	0.871449	YP_583924.1	Q1LMH1 Beta-lactamase
Rmet_1777	129.596	69.6945	NF/NF		YP_583925.1	Q1LMH0 Na/Pi cotransporter II-related
Rmet_1778	68.7043	16.3968	65.0965	2.46128	YP_583926.1	Q1LMG9 Glyoxalase/bleomycin resistance protein/dioxygenase
Rmet_1779	148.959	25.8713	47.7179	5.54945	YP_583927.1	Q1LMG8 Putative uncharacterized protein
Rmet_1780	NF/NF		NF/NF		YP_583928.1	Q1LMG7 Methyltransferase type 11
Rmet_1781	NF/NF		55.1248	21.3731	YP_583929.1	Q1LMG6 Catechol 1,2-dioxygenase
Rmet_1782	131.556		NF/NF		YP_583930.1	Q1LMG5 Oxidoreductase FAD/NAD(P)-binding
Rmet_1783	NF/NF		NF/NF		YP_583931.1	Q1LMG4 Phenol hydroxylase conserved region
Rmet_1784	NeF		NeF		YP_583932.1	Q1LMG3 Methane/phenol/toluene hydroxylase
Rmet_1785	NeF		NeF		YP_583933.1	Q1LMG2 Monooxygenase component MmoB/DmpM
Rmet_1786	218.316	72.5106	27.1479		YP_583934.1	Q1LMG1 Methane/phenol/toluene hydroxylase
Rmet_1787	NeF		NeF		YP_583935.1	Q1LMG0 Phenol hydroxylase subunit
Rmet_1788	NF/NF		376.413		YP_583936.1	Q1LMF9 Sigma-54 factor, interaction region
Rmet_1789	NeF		NeF		YP_583937.1	Q1LMF8 Transcriptional regulator, GntR family
Rmet_1790	339.388	39.1849	281.317	48.4165	YP_583938.1	Q1LMF7 FAD linked oxidase-like protein
Rmet_1791	65.27	19.9511	40.4786	3.10545	YP_583939.1	Q1LMF6 Secretion protein HlyD
Rmet_1792	NF/NF		111.919	95.3432	YP_583940.1	Q1LMF5 ABC transporter-related protein
Rmet_1793	NeF		NeF		YP_583941.1	Q1LMF4 Putative uncharacterized protein
Rmet_1794	NeF		NeF		YP_583942.1	Q1LMF3 Putative uncharacterized protein
Rmet_1795	230.805		NF/NF		YP_583943.1	Q1LMF2 Transcriptional regulator, LysR family
Rmet_1796	NeF		NeF		YP_583944.1	Q1LMF1 Fusaric acid resistance protein conserved region
Rmet_1797	NeF		NeF		YP_583945.1	Q1LMF0 Putative uncharacterized protein
Rmet_1798	272.721	68.5434	156.398	34.0366	YP_583946.1	Q1LME9 Putative uncharacterized protein
Rmet_1799	21.9424	7.68114	75.7074	4.377	YP_583947.1	Q1LME8 Transcriptional regulator, ArsR family
Rmet_1800	NeF		NeF		YP_583948.1	Q1LME7 Transcriptional regulator, MarR family
Rmet_1801	165.912		145.904		YP_583949.1	Q1LME6 Uncharacterized protein UPF0065
Rmet_1802	NeF		NeF		YP_583950.1	Q1LME5 Sulfatase
Rmet_1803	NeF		NeF		YP_583951.1	Q1LME4 CDP-alcohol phosphatidyltransferase
Rmet_1804	218.697	25.6441	77.9934	17.3054	YP_583952.1	Q1LME3 2OG-Fe(II) oxygenase
Rmet_1805	NeF		NeF		YP_583953.1	Q1LME2 Putative uncharacterized protein
Rmet_1806	NeF		NeF		YP_583954.1	Q1LME1 Putative uncharacterized protein
Rmet_1807	549.211	96.7577	619.74	58.1972	YP_583955.1	Q1LME0 RfbF; ADP-glucose pyrophosphorylase
Rmet_1808	1026.6	13.3813	1158.49	298.08	YP_583956.1	Q1LMD9 2,3-dimethylmalate lyase
Rmet_1809	310.892	2.59909	362.46	28.8712	YP_583957.1	Q1LMD8 Thiamine pyrophosphate enzyme-like TPP-binding
Rmet_1810	669.77	115.103	717.686	143.01	YP_583958.1	Q1LMD7 Aminotransferase, class V
Rmet_1811	171.702	21.2911	206.114	1.39105	YP_583959.1	Q1LMD6 Phospholipase D/Transphosphatidylase
Rmet_1812	412.184	386.902	19.4541		YP_583960.1	Q1LMD5 Rieske (2Fe-2S) region
Rmet_1813	33.0942		96.0551		YP_583961.1	Q1LMD4 L-carnitine dehydratase/bile acid-inducible protein F
Rmet_1814	255.615		NF/NF		YP_583962.1	Q1LMD3 Acyl-CoA dehydrogenase-like protein
Rmet_1815	NeF		NeF		YP_583963.1	Q1LMD2 Uncharacterized protein UPF0065
Rmet_1816	NeF		NeF		YP_583964.1	Q1LMD1 Acyl-CoA dehydrogenase-like protein
Rmet_1817	NeF		NeF		YP_583965.1	Q1LMD0 Transcriptional regulator, IclR family
Rmet_1818	NeF		NeF		YP_583966.1	Q1LMC9 Transcriptional regulator, IclR family
Rmet_1819	NeF		NeF		YP_583967.1	Q1LMC8 TonB-dependent siderophore receptor
Rmet_1820	1022.39	169.157	1077.58	84.0604	YP_583968.1	Q1LMC7 Phosphoribosylglycinamide formyltransferase 2
Rmet_1821	100.323	29.6581	21.2303	0.353056	YP_583969.1	Q1LMC6 MscS Mechanosensitive ion channel
Rmet_1822	NF/NF		NF/NF		YP_583970.1	Q1LMC5 Metal dependent phosphohydrolase
Rmet_1823	NeF		NeF		YP_583971.1	Q1LMC4 Heat shock protein DnaJ-like protein
Rmet_1824	736.014	138.046	640.569	183.72	YP_583972.1	Q1LMC3 Ankyrin
Rmet_1825	514.717	77.8894	367.095	2.95869	YP_583973.1	Q1LMC2 TatD-related deoxyribonuclease
Rmet_1826	300.154	71.5528	87.7044	49.6111	YP_583974.1	Q1LMC1 Type IV pilus assembly PilZ
Rmet_1827	192.305	35.5027	134.689	24.7547	YP_583975.1	Q1LMC0 DNA polymerase III, delta prime subunit
Rmet_1828	371.901	10.4085	445.22	165.557	YP_583976.1	Q1LMB9 Thymidylate kinase
Rmet_1829	85.234	22.3561	34.234	22.5763	YP_583977.1	Q1LMB8 Aminodeoxychorismate lyase
Rmet_1830	526.335	102.391	587.05	70.0787	YP_583978.1	Q1LMB7 Glycine cleavage T protein (Aminomethyl transferase)
Rmet_1831	51.2776	6.66473	75.7435	0.557052	YP_583979.1	Q1LMB6 Putative uncharacterized protein
Rmet_1832	60.0143	33.5007	63.6552	8.22355	YP_583980.1	Q1LMB5 Putative uncharacterized protein
Rmet_1833	159.01	15.1988	201.505	117.545	YP_583981.1	Q1LMB4 GCN5-related N-acetyltransferase
Rmet_1834	NF/NF		NF/NF		YP_583982.1	Q1LMB3 Transcriptional regulator, GntR family
Rmet_1835	36.0022	7.93944	393.858	464.336	YP_583983.1	Q1LMB2 6-phosphogluconate dehydrogenase, NAD-binding
Rmet_1836	NeF		NeF		YP_583984.1	Q1LMB1 Type III effector Hrp-dependent outers
Rmet_1837	NeF		NeF		YP_583985.1	Q1LMB0 Class II aldolase/adducin-like protein
Rmet_1838	NeF		NeF		YP_583986.1	Q1LMA9 Major facilitator superfamily MFS_1
Rmet_1839	272.845	61.6302	382.123	129.926	YP_583987.1	Q1LMA8 Xylose isomerase-like TIM barrel
Rmet_1840	251.488	6.03455	346.696	35.1042	YP_583988.1	Q1LMA7 NAD-dependent epimerase/dehydratase
Rmet_1841	53.3283		NF/NF		YP_583989.1	Q1LMA6 4-hydroxybenzoyl-CoA thioesterase
Rmet_1842	632.399	65.2032	452.524	202.674	YP_583990.1	Q1LMA5 Twin-arginine translocation pathway signal
Rmet_1843	37.2916		NF/NF		YP_583991.1	Q1LMA4 Alpha/beta hydrolase fold-3
Rmet_1844	60.4185	3.82027	106.618	11.1249	YP_583992.1	Q1LMA3 Appr-1-p processing
Rmet_1845	247.124	83.7787	112.043	11.5069	YP_583993.1	Q1LMA2 Alpha/beta hydrolase fold
Rmet_1846	225.846	6.44191	141.37	20.5546	YP_583994.1	Q1LMA1 Short-chain dehydrogenase/reductase SDR
Rmet_1847	NF/NF		33.48		YP_583995.1	Q1LMA0 Putative glutathione S-transferase-related protein
Rmet_1848	122.913	6.82476	240.826	165.42	YP_583996.1	Q1LM99 Class II aldolase/adducin-like protein
Rmet_1849	409.911	100.532	486.857	94.0696	YP_583997.1	Q1LM98 Alcohol dehydrogenase, zinc-binding
Rmet_1850	267.098		134.76	29.4706	YP_583998.1	Q1LM97 Phenylacetic acid degradation-related protein
Rmet_1851	103.186	79.2669	65.416		YP_583999.1	Q1LM96 Short-chain dehydrogenase/reductase SDR
Rmet_1852	258.786	136.351	322.864	118.156	YP_584000.1	Q1LM95 Acyl-CoA dehydrogenase-like protein
Rmet_1853	969.697	76.7427	1087.71	105.275	YP_584001.1	Q1LM94 Thiolase
Rmet_1854	117.812		NF/NF		YP_584002.1	Q1LM93 Isochorismatase hydrolase
Rmet_1855	1759.2	4.01474	1805.99	227.569	YP_584003.1	Q1LM92 3-hydroxyacyl-CoA dehydrogenase / short chain enoyl-CoA hydratase
Rmet_1856	NeF		NeF		YP_584004.1	Q1LM91 Amino acid permease-associated region
Rmet_1857	NeF		NeF		YP_584005.1	Q1LM90 Putative uncharacterized protein
Rmet_1858	113.091	69.2621	19.9515		YP_584006.1	Q1LM89 ABC transporter-related protein
Rmet_1859	66.0819	24.0032	95.1618		YP_584007.1	Q1LM88 ABC transporter-related protein
Rmet_1860	30.4885		NF/NF		YP_584008.1	Q1LM87 Inner-membrane translocator
Rmet_1861	NeF		NeF		YP_584009.1	Q1LM86 Inner-membrane translocator
Rmet_1862	1006.77	6.48107	610.257	146.456	YP_584010.1	Q1LM85 Extracellular ligand-binding receptor
Rmet_1863	887.982	113.644	941.473	56.5908	YP_584011.1	Q1LM84 AMP-dependent synthetase and ligase
Rmet_1864	244.741	79.2009	90.6275	13.3359	YP_584012.1	Q1LM83 UPF0061 protein Rmet_1864
Rmet_1865	234.59	90.5173	156.066	54.6524	YP_584013.1	Q1LM82 Methionine sulfoxide reductase B
Rmet_1866	NeF		NeF		YP_584014.1	Q1LM81 Probable intracellular septation protein
Rmet_1867	411.691	108.567	437.91	160.042	YP_584015.1	Q1LM80 Transcriptional regulator BolA
Rmet_1868	3389.86	482.516	2927.15	133.15	YP_584016.1	Q1LM79 PpiC-type peptidyl-prolyl cis-trans isomerase
Rmet_1869	NeF		NeF		YP_584017.1	Q1LM78 Putative uncharacterized protein
Rmet_1870	1504.91	81.806	1495.66	74.2356	YP_584018.1	Q1LM77 Phosphoribosylformylglycinamidine synthase
Rmet_1871	387.36	22.5189	658.427	324.418	YP_584019.1	Q1LM76 Putative transcriptional regulator
Rmet_1872	21.8631		NF/NF		YP_584020.1	Q1LM75 Diguanylate cyclase (GGDEF domain)
Rmet_1873	633.44	119.939	680.642	71.1367	YP_584021.1	Q1LM74 Amidase
Rmet_1874	64.0706		NF/NF		YP_584022.1	Q1LM73 TRAP dicarboxylate transporter-DctP subunit
Rmet_1875	NeF		NeF		YP_584023.1	Q1LM72 TRAP-type C4-dicarboxylate transport system, small permease component
Rmet_1876	NeF		NeF		YP_584024.1	Q1LM71 TRAP dicarboxylate transporter-DctM subunit
Rmet_1877	NeF		NeF		YP_584025.1	Q1LM70 FAD dependent oxidoreductase
Rmet_1878	57.8558	6.59526	72.1758	18.567	YP_584026.1	Q1LM69 Putative uncharacterized protein
Rmet_1879	330.58	19.0884	422.084	94.5869	YP_584027.1	Q1LM68 Glucose-6-phosphate isomerase
Rmet_1880	207.611	95.737	136.093	92.1837	YP_584028.1	Q1LM67 ABC transporter-related protein
Rmet_1881	75.3235	36.0182	23.185		YP_584029.1	Q1LM66 Lipolytic enzyme, G-D-S-L
Rmet_1882	1191.33	177.99	589.36	234.429	YP_584030.1	Q1LM65 PpiC-type peptidyl-prolyl cis-trans isomerase
Rmet_1883	1666.39	139.344	1708.41	202.34	YP_584031.1	Q1LM64 ATP-dependent protease La
Rmet_1884	1089.61	10.7393	749.247	192.851	YP_584032.1	Q1LM63 ATP-dependent Clp protease ATP-binding subunit clpX
Rmet_1885	3014.23	23.9489	3434.88	172.228	YP_584033.1	Q1LM62 ATP-dependent Clp protease proteolytic subunit
Rmet_1886	5656.41	864.55	6400.82	727.887	YP_584034.1	Q1LM61 Trigger factor
Rmet_1887	NeF		NeF		YP_584035.1	Q1LM60 tRNA 5-methylaminomethyl-2-thiouridine biosynthesis bifunctional protein mnmC
Rmet_1888	253.555	53.7593	326.227	93.4669	YP_584036.1	Q1LM59 Putative uncharacterized protein
Rmet_1889	182.025	48.232	NF/NF		YP_584037.1	Q1LM58 Putative uncharacterized protein
Rmet_1890	NF/NF		29.7098		YP_584038.1	Q1LM57 Endonuclease
Rmet_1891	NeF		NeF		YP_584039.1	Q1LM56 Putative uncharacterized protein
Rmet_1892	NeF		NeF		YP_584040.1	Q1LM55 Transcriptional regulator, LuxR family
Rmet_1893	NeF		NeF		YP_584041.1	Q1LM54 Putative uncharacterized protein
Rmet_1894	NeF		NeF		YP_584042.1	Q1LM53 Transcriptional regulator, LysR family
Rmet_1895	NeF		NeF		YP_584043.1	Q1LM52 Thiamine pyrophosphate enzyme-like TPP-binding
Rmet_1896	NeF		NeF		YP_584044.1	Q1LM51 4-oxalocrotonate tautomerase
Rmet_1897	22.8725		NF/NF		YP_584045.1	Q1LM50 Transcriptional regulator, LysR family
Rmet_1898	NF/NF		NF/NF		YP_584046.1	Q1LM49 Aldehyde dehydrogenase
Rmet_1899	NeF		NeF		YP_584047.1	Q1LM48 Pyruvate dehydrogenase (Cytochrome)
Rmet_1900	38.3822	6.91091	NF/NF		YP_584048.1	Q1LM47 Transcriptional regulator, LysR family
Rmet_1901	NF/NF		187.867		YP_584049.1	Q1LM46 Transcriptional regulator, XRE family
Rmet_1902	12.8874		150.098		YP_584050.1	Q1LM45 Putative uncharacterized protein
Rmet_1903	NeF		NeF		YP_584051.1	Q1LM44 Putative uncharacterized protein
Rmet_1904	NF/NF		162.563		YP_584052.1	Q1LM43 Putative uncharacterized protein
Rmet_1905	125.405	50.9619	554.314	442.291	YP_584053.1	Q1LM42 Transcriptional regulator, LacI family
Rmet_1906	NeF		NeF		YP_584054.1	Q1LM41 Uncharacterized protein UPF0065
Rmet_1907	NF/NF		NF/NF		YP_584055.1	Q1LM40 Porin, Gram-negative type
Rmet_1908	NeF		NeF		YP_584056.1	Q1LM39 Cupin 2, conserved barrel
Rmet_1909	NeF		NeF		YP_584057.1	Q1LM38 Alcohol dehydrogenase, zinc-binding
Rmet_1910	NF/NF		56.434		YP_584058.1	Q1LM37 Putative uncharacterized protein
Rmet_1911	NeF		NeF		YP_584059.1	Q1LM36 Short-chain dehydrogenase/reductase SDR
Rmet_1912	NeF		NeF		YP_584060.1	Q1LM35 Intradiol ring-cleavage dioxygenase
Rmet_1913	NeF		NeF		YP_584061.1	Q1LM34 Antibiotic biosynthesis monooxygenase
Rmet_1914	NF/NF		5.36386		YP_584062.1	Q1LM33 Isochorismatase hydrolase
Rmet_1915	NeF		NeF		YP_584063.1	Q1LM32 Two component transcriptional regulator, LuxR family
Rmet_1916	15.8752		14.8968		YP_584064.1	Q1LM31 Isochorismatase hydrolase
Rmet_1917	NeF		NeF		YP_584065.1	Q1LM30 DSBA oxidoreductase
Rmet_1918	NeF		NeF		YP_584066.1	Q1LM29 Putative uncharacterized protein
Rmet_1919	NeF		NeF		YP_584067.1	Q1LM28 Putative uncharacterized protein
Rmet_1920	NeF		NeF		YP_584068.1	Q1LM27 Isochorismatase hydrolase
Rmet_1921	NeF		NeF		YP_584069.1	Q1LM26 Putative uncharacterized protein
Rmet_1922	NeF		NeF		YP_584070.1	Q1LM25 Cyclic nucleotide-regulated FAD-dependent pyridine nucleotide-disulphide oxidoreductase
Rmet_1923	NeF		NeF		YP_584071.1	Q1LM24 OsmC-like protein
Rmet_1924	NeF		NeF		YP_584072.1	Q1LM23 Short-chain dehydrogenase/reductase SDR
Rmet_1925	69.3029	24.8911	NF/NF		YP_584073.1	Q1LM22 Putative uncharacterized protein
Rmet_1926	18.9273		NF/NF		YP_584074.1	Q1LM21 Major facilitator superfamily MFS_1
Rmet_1927	64.026	17.4584	66.4624	17.6333	YP_584075.1	Q1LM20 Amidase
Rmet_1928	29.7851		71.448	1.59351	YP_584076.1	Q1LM19 Putative uncharacterized protein
Rmet_1929	NeF		NeF		YP_584077.1	Q1LM18 Transcriptional regulator, GntR family
Rmet_1930	NeF		NeF		YP_584078.1	Q1LM17 Transcriptional regulator, IclR family
Rmet_1931	34.9579		NF/NF		YP_584079.1	Q1LM16 Amidase, hydantoinase/carbamoylase
Rmet_1932	NeF		NeF		YP_584080.1	Q1LM15 Extracellular solute-binding protein, family 5
Rmet_1933	NeF		NeF		YP_584081.1	Q1LM14 Binding-protein-dependent transport systems inner membrane component
Rmet_1934	NF/NF		NF/NF		YP_584082.1	Q1LM13 Binding-protein-dependent transport systems inner membrane component
Rmet_1935	NeF		NeF		YP_584083.1	Q1LM12 Oligopeptide/dipeptide ABC transporter, ATP-binding protein-like protein
Rmet_1936	NeF		NeF		YP_584084.1	Q1LM11 Oligopeptide/dipeptide ABC transporter, ATP-binding protein-like protein
Rmet_1937	118.278		NF/NF		YP_584085.1	Q1LM10 Amidase
Rmet_1938	36.6692	2.48954	131.936	19.0602	YP_584086.1	Q1LM09 Putative uncharacterized protein
Rmet_1939	63.6381		NF/NF		YP_584087.1	Q1LM08 Transcriptional regulator, LysR family
Rmet_1940	NeF		NeF		YP_584088.1	Q1LM07 Putative uncharacterized protein
Rmet_1941	NeF		NeF		YP_584089.1	Q1LM06 Putative uncharacterized protein
Rmet_1942	105.984	88.2711	NF/NF		YP_584090.1	Q1LM05 Acriflavin resistance protein
Rmet_1943	97.5382	17.5934	NF/NF		YP_584091.1	Q1LM04 Secretion protein HlyD
Rmet_1944	119.405	14.5878	NF/NF		YP_584092.1	Q1LM03 Squalene/phytoene synthase
Rmet_1945	235.281	18.8626	265.652	25.7774	YP_584093.1	Q1LM02 Amidase, hydantoinase/carbamoylase
Rmet_1946	NeF		NeF		YP_584094.1	Q1LM01 Putative transmembrane protein
Rmet_1947	951.029	188.055	1027.63	299.998	YP_584095.1	Q1LM00 Two component transcriptional regulator, winged helix family
Rmet_1948	50.4576	19.0614	NF/NF		YP_584096.1	Q1LLZ9 Sensor protein
Rmet_1949	NeF		NeF		YP_584097.1	Q1LLZ8 General substrate transporter
Rmet_1950	9824.3	1850.42	10644	1107.95	YP_584098.1	Q1LLZ7 Alkyl hydroperoxide reductase/ Thiol specific antioxidant/ Mal allergen
Rmet_1951	782.681	265.517	879.322	277.449	YP_584099.1	Q1LLZ6 Alkylhydroperoxidase AhpD core
Rmet_1952	171.095	18.4613	304.709	184.377	YP_584100.1	Q1LLZ5 GCN5-related N-acetyltransferase
Rmet_1953	338.438	60.0289	442.072	191.773	YP_584101.1	Q1LLZ4 2-C-methyl-D-erythritol 2,4-cyclodiphosphate synthase
Rmet_1954	199.557	25.2589	238.691	60.7179	YP_584102.1	Q1LLZ3 2-C-methyl-D-erythritol 4-phosphate cytidylyltransferase
Rmet_1955	419.536	2.43629	429.167	229.486	YP_584103.1	Q1LLZ2 Transcription-repair coupling factor
Rmet_1956	516.233	148.873	657.409	227.28	YP_584104.1	Q1LLZ1 Acetylornithine deacetylase / acetylornithine deacetylase ArgE. Metallo peptidase. MEROPS family M20A
Rmet_1957	59.4467		109.641		YP_584105.1	Q1LLZ0 Gamma-glutamyltranspeptidase
Rmet_1958	284.993	75.4547	344.609	88.4919	YP_584106.1	Q1LLY9 OsmC-like protein
Rmet_1959	972.833	202.75	1238.99	387.884	YP_584107.1	Q1LLY8 ATPase AAA-2
Rmet_1960	NeF		NeF		YP_584108.1	Q1LLY7 D-(-)-3-hydroxybutyrate oligomer hydrolase
Rmet_1961	NeF		NeF		YP_584109.1	Q1LLY6 Protein crcB homolog
Rmet_1962	209.366	104.993	268.788	105.965	YP_584110.1	Q1LLY5 Molybdopterin synthase subunit MoaE
Rmet_1963	59.8209		98.177	46.6613	YP_584111.1	Q1LLY4 Molybdopterin synthase subunit MoaD
Rmet_1964	288.079	17.5201	333.115	36.0725	YP_584112.1	Q1LLY3 MoeA-like, domain I and II
Rmet_1965	2148.45	400.589	2330.1	387.506	YP_584113.1	Q1LLY2 L-threonine synthase
Rmet_1966	2588.96	100.977	2579.76	815.478	YP_584114.1	Q1LLY1 Homoserine dehydrogenase
Rmet_1967	1270.42	166.892	1321.15	221.777	YP_584115.3	Q1LLY0 Aminotransferase
Rmet_1968	633.454	167.981	778.469	266.256	YP_584116.1	Q1LLX9 Putative uncharacterized protein
Rmet_1969	1093.38	206.503	1328.99	302.374	YP_584117.1	Q1LLX8 Alkyl hydroperoxide reductase/ Thiol specific antioxidant/ Mal allergen
Rmet_1970	1597.08	227.084	1601.77	381.491	YP_584118.1	Q1LLX7 PhoH-like protein
Rmet_1971	135.425	25.415	135.923		YP_584119.1	Q1LLX6 Putative signal peptide protein
Rmet_1972	31.941		NF/NF		YP_584120.1	Q1LLX5 NLP/P60
Rmet_1973	NeF		NeF		YP_584121.1	Q1LLX4 Phosphate transporter
Rmet_1974	1249.13	429.166	854.598	295.381	YP_584122.1	Q1LLX3 Putative uncharacterized protein
Rmet_1975	371.575	29.7885	239.411	124.481	YP_584123.1	Q1LLX2 Primary replicative DNA helicase
Rmet_1976	8849.02	1031.58	9065.36	1438.42	YP_584124.1	Q1LLX1 50S ribosomal protein L9
Rmet_1977	5166.89	641.244	5625.94	429.805	YP_584125.1	Q1LLX0 30S ribosomal protein S18
Rmet_1978	56.1858		52.5008		YP_584126.1	Q1LLW9 Restart primosome assembly protein PriB
Rmet_1979	4861.37	151.641	5365.76	135.715	YP_584127.1	Q1LLW8 30S ribosomal protein S6
Rmet_1980	44.789		57.873	14.3833	YP_584128.1	Q1LLW7 Asparaginase
Rmet_1981	314.4	244.457	307.478	231.209	YP_584129.1	Q1LLW6 LexA repressor
Rmet_1982	NF/NF		33.514		YP_584130.1	Q1LLW5 Putative uncharacterized protein
Rmet_1983	NeF		NeF		YP_584131.1	Q1LLW4 Putative uncharacterized protein
Rmet_1984	3126.98	1391.91	2968.82	2673.87	YP_584132.1	Q1LLW3 Aminotransferase
Rmet_1985	281.492	64.9074	709.668	719.381	YP_584133.1	Q1LLW2 YidE/YbjL duplication
Rmet_1986	NeF		NeF		YP_584134.1	Q1LLW1 Putative uncharacterized protein
Rmet_1987	NeF		NeF		YP_584135.1	Q1LLW0 Putative uncharacterized protein
Rmet_1988	NeF		NeF		YP_584136.1	Q1LLV9 Putative uncharacterized protein
Rmet_1989	187.289	49.9053	199.583	62.6863	YP_584137.1	Q1LLV8 TIM-barrel protein, yjbN family
Rmet_1990	NeF		NeF		YP_584138.1	Q1LLV7 Putative uncharacterized protein
Rmet_1991	NeF		NeF		YP_584139.1	Q1LLV6 Putative uncharacterized protein
Rmet_1992	76.2329	20.2384	106.927	40.7344	YP_584140.1	Q1LK92 Transposase IS3/IS911
Rmet_1993	NeF		NeF		YP_584141.1	Q1LK93 Integrase, catalytic region
Rmet_1994	NeF		NeF		YP_584142.1	Q1LLV3 Putative uncharacterized protein
Rmet_1995	NeF		NeF		YP_584143.1	Q1LLV2 Putative uncharacterized protein
Rmet_1996	NeF		NeF		YP_584144.1	Q1LLV1 Putative uncharacterized protein
Rmet_1997					NPDB	Q1LLV0 Site specific recombinase
Rmet_2002	NeF		NeF		YP_584149.1	Q1LLU5 Phage integrase
Rmet_2003	223.506		NF/NF		YP_584151.1	Q1LLU4 Putative uncharacterized protein
Rmet_2004	NeF		NeF		YP_584152.1	Q1LLU3 Putative uncharacterized protein
Rmet_2005	NeF		NeF		YP_584153.1	Q1LLU2 Putative uncharacterized protein
Rmet_2006	NeF		NeF		YP_584154.1	Q1LLU1 Putative uncharacterized protein
Rmet_2011	NeF		NeF		YP_584159.1	Q1LLT6 Putative uncharacterized protein
Rmet_2012	NeF		NeF		YP_584160.1	Q1LLT5 Putative uncharacterized protein
Rmet_2013	NeF		NeF		YP_584161.1	Q1LLT4 Putative uncharacterized protein
Rmet_2014	NeF		NeF		YP_584162.1	Q1LLT3 Putative uncharacterized protein
Rmet_2015					NPDB	Q1LLT2 Putative phage-related protein
Rmet_2016	330.824	47.2897	164.42	33.3373	YP_584164.1	Q1LLT1 Putative uncharacterized protein
[truncated: 3,859 more rows]

## Sheet: Up-regulated ∆zupT
Comparison of strain AE104 and its mutant, predicted numbers per cell. NeF, never found; NF not found; NQ, not quantified. Red numbers show down-regulation between AE104/CH34 and ∆zupT/AE104, respectively, and green numbers
up-regulation (2-fold). Numbers in italics indicate not significant differences, overlapping deviation bars of the values or proteins found only in one strain.
Up-regulated more than 3-fold, ranked by quotient
Rmet	MeanAE104	DevAE104	Mean∆zupT	Dev∆zupT	protein.Accession	Description
Rmet_5743	44.4804	20.3352	382.52	97.1908	YP_587871.1	Q1LB74 AMP-dependent synthetase and ligase
Rmet_3404	19.6153	4.40514	157.519	130.295	YP_585545.1	Q1LHV0 DNA-3-methyladenine glycosylase I
Rmet_4389	21.0787	1.42864	159.42	134.068	YP_586523.1	Q1LF22 Beta-ketoacyl synthase
Rmet_4761	112.486	71.9637	742.61	25.9388	YP_586892.1	Q1LE03 Putative uncharacterized protein
Rmet_5099	280.228	92.4398	1633.8	430.529	YP_587227.1	Q1LD18 Transcriptional regulator, GntR family
Rmet_2413	54.2387	33.5048	311.543	84.9717	YP_584559.1	Q1LKN6 Glycoside hydrolase, family 3-like protein
Rmet_3847	64.0732	1.61746	315.011	231.185	YP_585984.1	Q1LGL1 Putative uncharacterized protein
Rmet_5262	106.834	44.1204	429.552	10.1045	YP_587390.1	Q1LCK5 Flagellar motor switch protein FliG
Rmet_4345	81.8525	25.6096	304.658	183.319	YP_586479.1	Q1LF66 Putative uncharacterized protein
Rmet_1938	36.6692	2.48954	131.936	19.0602	YP_584086.1	Q1LM09 Putative uncharacterized protein
Rmet_0525	207.179	46.4856	741.853	132.494	YP_582680.1	Q1LR15 Putative uncharacterized protein
Rmet_3527	159.601	101.831	559.755	84.1719	YP_585668.1	Q1LHH7 Ornithine cyclodeaminase
Rmet_1799	21.9424	7.68114	75.7074	4.377	YP_583947.1	Q1LME8 Transcriptional regulator, ArsR family
Rmet_5000	210.579	22.4302	704.085	155.204	YP_587131.1	Q1LDB4 Putative uncharacterized protein
Rmet_4462	58.8565	6.9537	187.587	13.9415	YP_586596.1	Q1LEU9 Putative uncharacterized protein
Rmet_4467	81.4573	12.9	251.152	7.58916	YP_586601.1	Q1LEU4 3-demethylubiquinone-9 3-methyltransferase
Rmet_3783	90.4164	11.8923	270.798	156.049	YP_585922.1	Q1LGS3 Putative transcriptional regulator, TetR family
Up-regulated in the mutant, ranked by number of proteins
Rmet	MeanAE104	DevAE104	Mean∆zupT	Dev∆zupT	protein.Accession	Description
Rmet_1527	NF/NF		8604.71	318.777	YP_583679.1	Q1LN66 Cyclic nucleotide-binding domain (CNMP-BD) protein
Rmet_1501	69.5999		6269.19	139.106	YP_583653.1	Q1LN92 Ribulose bisphosphate carboxylase large chain
Rmet_1536	NF/NF		5295.4	248.717	YP_583688.1	Q1LN57 Hydrogenase accessory protein HypB
Rmet_1525	33.6964		4610.69	84.1668	YP_583677.1	Q1LN68 Nickel-dependent hydrogenase, large subunit
Rmet_4603	122.615	63.9871	3703.16		YP_586734.1	Q1LEG1 Transcriptional regulator, GntR family
Rmet_3299	1634.04		3543.06		YP_585440.1	Q1LI55 50S ribosomal protein L30
Rmet_1540	NF/NF		2965.32	148.769	YP_583692.1	Q1LN53 Hydrogenase expression/formation protein HypE
Rmet_1162	968.323	363.548	2854.98		YP_583317.1	Q1LP78 50S ribosomal protein L35
Rmet_1009	1081.62	201.887	2809.85	667.755	YP_583164.1	Q1LPN1 Nitroreductase
Rmet_3278	227.316	85.3675	2415.94		YP_585419.1	Q1LI76 Twin-arginine translocation pathway signal
Rmet_1693	NF/NF		2044.83		YP_583843.1	Q1LMQ2 Methyl-accepting chemotaxis sensory transducer
Rmet_1524	NF/NF		1854.56	67.3005	YP_583676.1	Q1LN69 NADH ubiquinone oxidoreductase, 20 kDa subunit
Rmet_1526	NF/NF		1765.93	36.8367	YP_583678.1	Q1LN67 HoxW protein
Rmet_1522	NF/NF		1694.21	1662.2	YP_583674.1	Q1LN71 Respiratory-chain NADH dehydrogenase domain, 51 kDa subunit
Rmet_1500	NF/NF		1688.97	1619.44	YP_583652.1	Q1LN93 Ribulose bisphosphate carboxylase small chain
Rmet_5099	280.228	92.4398	1633.8	430.529	YP_587227.1	Q1LD18 Transcriptional regulator, GntR family
Rmet_5866	590.536	121.345	1497.33	912.44	YP_587994.1	Q1LAV1 Phosphoribosyltransferase
Rmet_3304	566.963		1422.3	351.674	YP_585445.1	Q1LI50 SSU ribosomal protein S14P
Rmet_3765	NF/NF		1402.35		YP_585904.1	Q1LGT9 Methylated-DNA--protein-cysteine methyltransferase
Rmet_4822	544.174	427.834	1254.21	459.088	YP_586953.1	Q1LDU2 Putative uncharacterized protein
Rmet_4760	527.759	482.221	1247.12		YP_586891.1	Q1LE04 Transcriptional regulator, XRE family
Rmet_1523	NF/NF		1098.46	988.508	YP_583675.1	Q1LN70 Ferredoxin
Rmet_4661	233.472	69.8076	1066.08	814.461	YP_586792.1	Q1LEA3 RNA polymerase sigma factor, RpoD2
Rmet_4270	NF/NF		1027.71		YP_586405.1	Q1LFE0 Intradiol ring-cleavage dioxygenase
Rmet_1412	60.2165	32.3454	1018.38		YP_583564.1	Q1LNI1 D-aminopeptidase DppA. Metallo peptidase. MEROPS family M55
Rmet_5364	73.194	14.0467	963.835		YP_587492.1	Q1LCA3 Aldo/keto reductase
Rmet_5356	85.1296	78.2178	886.188	833.626	YP_587484.1	Q1LCB1 Uncharacterized protein UPF0065
Rmet_5371	430.832		881.442	303.737	YP_587499.1	Q1LC96 Catalase-peroxidase
Rmet_5700	97.6506		863.83		YP_587828.1	Q1LBB7 Putative uncharacterized protein
Rmet_3445	93.2381	17.1676	812.569		YP_585586.1	Q1LHQ9 Transcriptional regulator, GntR family
Rmet_4968	234.529		795.639	174.192	YP_587099.1	Q1LDE6 Di-haem cytochrome c peroxidase
Rmet_3969	260.645	44.0357	794.027		YP_586106.1	Q1LG89 CheA signal transduction histidine kinases
Rmet_5126	NF/NF		751.171	16.0403	YP_587254.1	Q1LCZ1 Putative uncharacterized protein
Not found in the parent but in the mutant, ranked by the number of proteins
Rmet	MeanAE104	DevAE104	Mean∆zupT	Dev∆zupT	protein.Accession	Description
Rmet_1527	NF/NF		8604.71	318.777	YP_583679.1	Q1LN66 Cyclic nucleotide-binding domain (CNMP-BD) protein
Rmet_1536	NF/NF		5295.4	248.717	YP_583688.1	Q1LN57 Hydrogenase accessory protein HypB
Rmet_1540	NF/NF		2965.32	148.769	YP_583692.1	Q1LN53 Hydrogenase expression/formation protein HypE
Rmet_1524	NF/NF		1854.56	67.3005	YP_583676.1	Q1LN69 NADH ubiquinone oxidoreductase, 20 kDa subunit
Rmet_1526	NF/NF		1765.93	36.8367	YP_583678.1	Q1LN67 HoxW protein
Rmet_1522	NF/NF		1694.21	1662.2	YP_583674.1	Q1LN71 Respiratory-chain NADH dehydrogenase domain, 51 kDa subunit
Rmet_1500	NF/NF		1688.97	1619.44	YP_583652.1	Q1LN93 Ribulose bisphosphate carboxylase small chain
Rmet_1523	NF/NF		1098.46	988.508	YP_583675.1	Q1LN70 Ferredoxin
Rmet_5126	NF/NF		751.171	16.0403	YP_587254.1	Q1LCZ1 Putative uncharacterized protein
Rmet_1322	NF/NF		659.888	188.087	YP_583474.1	Q1LNS1 Aldehyde dehydrogenase
Rmet_1535	NF/NF		622.176	77.3396	YP_583687.1	Q1LN58 Hydrogenase nickel insertion protein HypA
Rmet_0626	NF/NF		601.982	211.315	YP_582781.1	Q1LQR4 Rhs element Vgr protein
Rmet_5214	NF/NF		592.679	241.284	YP_587342.1	Q1LCQ3 Glyoxalase/bleomycin resistance protein/dioxygenase
Rmet_1512	NF/NF		531.433	22.7037	YP_583664.1	Q1LN81 Phosphoribulokinase
Rmet_1537	NF/NF		504.128	33.339	YP_583689.1	Q1LN56 (NiFe) hydrogenase maturation protein HypF
Rmet_1539	NF/NF		492.957	29.2577	YP_583691.1	Q1LN54 Hydrogenase expression/formation protein HypD
Rmet_5752	NF/NF		486.199	68.785	YP_587880.1	Q1LB65 Putative uncharacterized protein
Rmet_1499	NF/NF		432.64	315.373	YP_583651.1	Q1LN94 ATPase associated with various cellular activities, AAA_5
Rmet_3727	NF/NF		408.553	21.2074	YP_585868.1	Q1LGX7 Acyl-CoA dehydrogenase-like protein
Rmet_1529	NF/NF		372.59	48.9387	YP_583681.1	Q1LB62 Integrase, catalytic region
Rmet_1541	NF/NF		370.856	61.3717	YP_583693.1	Q1LN52 Formyl transferase-like protein
Rmet_1513	NF/NF		327.371	150.618	YP_583665.1	Q1LN80 Transketolase
Rmet_3755	NF/NF		326.68	94.0693	YP_585895.1	Q1LGU9 Endoribonuclease L-PSP
Rmet_5096	NF/NF		296.183	106.76	YP_587224.1	Q1LD21 Aldehyde dehydrogenase
Rmet_5689	NF/NF		295.698	53.9191	YP_587817.1	Q1LBC8 Putative type 4 fimbrial biogenesis pily1-related protein signal peptide
Rmet_5814	NF/NF		292.838	58.9562	YP_587942.1	Q1LB03 Putative uncharacterized protein
Rmet_1511	NF/NF		237.115	199.662	YP_583663.1	Q1LN82 D-fructose 1,6-bisphosphatase
Rmet_5176	NQ/NQ		213.476	27.595	YP_587304.1	Q1LCU1 Translation initiation factor IF-1 3
Rmet_3684	NF/NF		207.465	61.9286	YP_585825.1	Q1LH20 Putative uncharacterized protein
Rmet_0557	NF/NF		203.633	247.161	YP_582712.1	Q1LQY3 Formate dehydrogenase delta subunit
Rmet_0610	NF/NF		187.127	58.0364	YP_582765.1	Q1LQT0 AMP-dependent synthetase and ligase
Rmet_2222	NF/NF		179.55	61.2948	YP_584370.1	Q1LL75 Cytochrome c, class I
Rmet_0893	NF/NF		171.238	1.62358	YP_583048.1	Q1LPZ7 Molybdopterin dehydrogenase, FAD-binding
Rmet_1498	NF/NF		169.264	38.1068	YP_583650.1	Q1LN95 von Willebrand factor, type A
Rmet_5672	NF/NF		159.954	55.7826	YP_587800.1	Q1LBE5 Two component heavy metal response transcriptional regulator, winged helix family
Rmet_3018	NF/NF		155.759	107.911	YP_585160.1	Q1LIY5 Putative uncharacterized protein
Rmet_4616	NF/NF		154.142	30.639	YP_586747.1	Q1LEE8 Putative uncharacterized protein
Rmet_4504	NF/NF		152.35	14.5593	YP_586638.1	Q1LEQ7 Transcriptional regulator, AraC family
Rmet_4925	NF/NF		150.61	48.6189	YP_587056.1	Q1LDI9 4-hydroxyphenylpyruvate dioxygenase
Rmet_3612	NF/NF		150.041	92.3956	YP_585753.1	Q1LH92 Methyltransferase type 11
Rmet_1497	NF/NF		143.504	10.2385	YP_583649.1	Q1LN96 Putative uncharacterized protein
Rmet_0213	NF/NF		122.517	105.384	YP_582368.1	Q1LRX7 Cyclic nucleotide-binding protein
Rmet_5154	NQ/NF		121.169	10.594	YP_587282.1	Q1LCW3 Short chain enoyl-CoA hydratase
Rmet_3620	NF/NF		117.686	4.37285	YP_585761.1	Q1LH84 Peptidase S1C, Do
Rmet_2339	NF/NF		117.358	55.6083	YP_584485.1	Q8GQ48 Putative uncharacterized protein ORF C62
Rmet_1792	NF/NF		111.919	95.3432	YP_583940.1	Q1LMF5 ABC transporter-related protein
Rmet_2262	NF/NF		103.737	86.2513	YP_584410.1	Q1LL35 Diguanylate cyclase
Rmet_1520	NF/NF		101.277	12.6203	YP_583672.1	Q1LN73 Triosephosphate isomerase
Rmet_0700	NF/NF		100.541	3.53333	YP_582855.1	Q1LQJ0 FAD dependent oxidoreductase
Rmet_4900	NF/NF		99.7529	55.4107	YP_587031.1	Q1LDL4 Transcriptional regulator, XRE family
Rmet_1562	NF/NF		92.0783	49.8827	YP_583714.1	Q1LN31 Putative uncharacterized protein
Rmet_5753	NF/NF		90.9693	12.137	YP_587881.1	Q1LB64 Putative uncharacterized protein
Rmet_4359	NF/NF		84.6269	69.9846	YP_586493.1	Q1LF52 Succinyl-CoA synthetase (ADP-forming) beta subunit
Rmet_0885	NF/NF		79.6158	53.6078	YP_583040.1	Q1LQ05 Transthyretin
Rmet_1521	NF/NF		76.4365	13.7853	YP_583673.1	Q1LN72 Ribose-5-phosphate isomerase
Rmet_0598	NF/NF		76.3005	13.0735	YP_582753.1	Q1LQU2 Twin-arginine translocation pathway signal
Rmet_1237	NF/NF		75.0758	7.9059	YP_583392.1	Q1LP03 Putative uncharacterized protein
Rmet_4327	NF/NF		74.8086	22.3383	YP_586461.1	Q1LF84 Putative uncharacterized protein
Rmet_2331	NF/NF		72.6646	7.23644	YP_584477.1	Q1LKW8 Putative secreted protein
Rmet_0480	NF/NF		69.6688	18.9617	YP_582635.1	Q9RBF5 Ralstonia eutropha insertion sequence IS1090
Rmet_1737	NF/NF		63.9716	14.7519	YP_583885.1	Q1LML0 RND efflux system, outer membrane lipoprotein, NodT
Rmet_3533	NF/NF		60.9618	7.76982	YP_585674.1	Q1LHH1 Phenylalanine 4-hydroxylase
Rmet_5714	NF/NF		60.3851	32.7336	YP_587842.1	Q1LBA3 Two component transcriptional regulator, LuxR family
Rmet_5388	NF/NF		60.1669	4.35195	YP_587516.1	Q1LC79 ApbE-like lipoprotein
Rmet_5464	NF/NF		59.236	43.2449	YP_587592.1	Q1LC03 Putative uncharacterized protein
Rmet_5693	NF/NF		58.3412	28.3681	YP_587821.1	Q1LBC4 Putative uncharacterized protein
Rmet_0960	NF/NF		57.9319	6.03317	YP_583115.1	Q1LPT0 Urease subunit beta
Rmet_1781	NF/NF		55.1248	21.3731	YP_583929.1	Q1LMG6 Catechol 1,2-dioxygenase
Rmet_4917	NF/NF		53.806	12.6769	YP_587048.1	Q1LDJ7 Cytochrome c oxidase, subunit II
Rmet_4451	NF/NF		47.6913	8.88163	YP_586585.1	Q1LEW0 UspA
Rmet_3998	NF/NF		44.8246	11.6628	YP_586135.1	Q1LG60 Putative uncharacterized protein
Rmet_3397	NF/NF		44.6391	10.953	YP_585538.1	Q1LHV7 GCN5-related N-acetyltransferase
Rmet_2703	NF/NF		39.9799	8.25195	YP_584845.1	Q1LJV0 Putative uncharacterized protein
Rmet_4010	NF/NF		35.8763	14.4897	YP_586147.1	Q1LG48 Shikimate kinase
Rmet_0257	NF/NF		32.8941	2.6299	YP_582412.1	Q1LRT3 RNA methyltransferase TrmH, group 2
Rmet_1411	NF/NF		29.7166	21.4331	YP_583563.1	Q1LNI2 Peptidase S58, DmpA
Rmet_0619	NF/NF		29.6777	11.2276	YP_582774.1	Q1LQS1 Putative uncharacterized protein
Rmet_0232	NF/NF		26.3523	2.04868	YP_582387.1	Q1LRV8 UvrD/REP helicase
Rmet_3058	NF/NF		23.9025	5.19936	YP_585199.1	Q1LIU6 Probable chorismate--pyruvate lyase

## Sheet: Down-regulated ∆zupT
Comparison of strain AE104 and its mutant, predicted numbers per cell. NeF, never found; NF not found; NQ, not quantified. Red numbers show down-regulation between AE104/CH34 and ∆zupT/AE104, respectively, and green numbers
up-regulation (2-fold). Numbers in italics indicate not significant differences, overlapping deviation bars of the values or proteins found only in one strain.
Down-regulated mor than 3-fold, ranked by quotient
Rmet	MeanAE104	DevAE104	Mean∆zupT	Dev∆zupT	protein.Accession	Description
Rmet_5252	2178.6	1086.06	76.1542	2.64968	YP_587380.1	Q1LCL5 Flagellin-like protein
Rmet_1040	576.38	175.674	47.4863	2.72674	YP_583195.1	Q1LPK0 Lipoprotein releasing system, transmembrane protein, LolC/E family
Rmet_3200	209.99	137.794	17.4533	0.184934	YP_585341.1	Q1LIF4 Glutamyl-tRNA reductase
Rmet_2542	772.057	152.515	79.8133	29.4647	YP_584688.1	Q1LKA7 Putative uncharacterized protein
Rmet_2715	735.951	625.037	77.0546	33.8261	YP_584857.1	Q1LJT8 Lipopolysaccharide heptosyltransferase I
Rmet_2936	496.056	223.224	62.8728	14.813	YP_585078.1	Q1LJ67 Twitching motility protein
Rmet_4484	383.396	16.3057	51.4485	2.59772	YP_586618.1	Q1LES7 Bifunctional deaminase-reductase-like protein
Rmet_4400	2088.16	249.1	286.537	44.0791	YP_586534.1	Q1LF11 Putative uncharacterized protein
Rmet_0154	228.494	150.902	31.3555	8.33163	YP_582309.1	Q1LS36 Lipid A biosynthesis acyltransferase
Rmet_2795	648.621	54.4625	95.1612	17.8326	YP_584937.1	Q1LJK8 Enoyl-CoA hydratase/isomerase
Rmet_2180	187.452	119.081	30.1098	4.02234	YP_584328.1	Q1LLB7 Two component transcriptional regulator, winged helix family
Rmet_1685	242.642	27.9664	40.0727	2.63906	YP_583835.1	Q1LMR0 Secretion protein HlyD
Rmet_3099	230.679	153.324	39.3286	11.9276	YP_585240.1	Q1LIQ5 Lytic transglycosylase, catalytic
Rmet_4589	625.61	69.0817	109.713	37.5065	YP_586720.1	Q1LEH5 DegT/DnrJ/EryC1/StrS aminotransferase
Rmet_1472	758.102	117.991	136.402	25.3296	YP_583624.1	Q1LNC1 KAP P-loop
Rmet_0672	734.162	198.16	134.914	37.6066	YP_582827.1	Q1LQL8 Methyl-accepting chemotaxis sensory transducer
Rmet_2164	324.834	68.8186	60.8968	15.7627	YP_584312.1	Q1LLD3 KAP P-loop
Rmet_0949	423.275	24.4845	80.7783	12.2422	YP_583104.1	Q1LPU1 Cytochrome c oxidase, subunit I
Rmet_1459	433.949	13.6275	83.1124	34.5483	YP_583611.1	Q1LND4 Putative transmembrane protein
Rmet_0697	3637.51	493.602	698.698	90.8818	YP_582852.1	Q1LQJ3 Pilus assembly protein major pilin PilA
Rmet_3696	505.581	287.669	99.005	38.794	YP_585837.1	Q1LH08 Peptidase M20
Rmet_3125	255.417	132.293	50.173	22.795	YP_585266.1	Q1LIM9 Cell division protein FtsQ
Rmet_4148	435.59	140.905	87.6893	20.7976	YP_586284.1	Q1LFR1 Squalene cyclase
Rmet_2863	290.473	126.46	59.204	18.7021	YP_585005.1	Q1LJE0 ABC transporter-related protein
Rmet_3516	270.01	24.1861	55.6891	4.93564	YP_585657.1	Q1LHI8 Inner-membrane translocator
Rmet_0491	483.523	77.6971	100.897	12.8434	YP_582646.1	Q1LR49 Lipopolysaccharide heptosyltransferase II
Rmet_2722	476.095	179.332	100.372	61.391	YP_584864.1	Q1LJT1 Lipopolysaccharide biosynthesis
Rmet_1821	100.323	29.6581	21.2303	0.353056	YP_583969.1	Q1LMC6 MscS Mechanosensitive ion channel
Rmet_0312	198.957	10.3994	42.2364	3.66703	YP_582467.1	Q1LRM8 Na/Pi cotransporter II-related
Rmet_2729	97.6996	20.3574	20.8995	5.91308	YP_584871.1	Q1LJS4 Glycosyl transferase, family 2
Rmet_2916	192.967	8.16383	44.2313	0.578517	YP_585058.1	Q1LJ87 Deoxynucleoside kinase
Rmet_5563	287.896	64.8053	67.1951	12.7209	YP_587691.1	Q1LBQ4 Putative uncharacterized protein
Rmet_4200	194.727	12.5206	45.8037	2.96388	YP_586336.1	Q1LFK9 Putative uncharacterized protein
Rmet_4545	153.482	13.5777	37.1993	1.95982	YP_586679.1	Q1LEL6 Putative uncharacterized protein
Rmet_0685	350.5	165.688	85.6015	25.1773	YP_582840.1	Q1LQK5 DNA translocase FtsK
Rmet_0262	361.352	9.74381	88.3349	29.5245	YP_582417.1	Q1LRS8 Cytochrome c oxidase, subunit I
Rmet_4252	612.741	45.765	151.278	3.33038	YP_586387.1	Q1LFF8 Fimbrial biogenesis outer membrane usher protein
Rmet_2965	519.591	0.414466	128.893	32.3435	YP_585107.1	Q1LJ38 NAD(P) transhydrogenase, beta subunit
Rmet_2445	231.314	30.5708	57.5832	12.2981	YP_584591.1	Q1LKK4 Putative uncharacterized protein
Rmet_2540	275.051	78.1776	68.8693	16.8372	YP_584686.1	Q1LKA9 Extracellular solute-binding protein, family 3
Rmet_3520	632.664	82.469	159.766	9.47755	YP_585661.1	Q1LHI4 ABC transporter-related protein
Rmet_4774	1692.52	7.18079	427.857	329.485	YP_586905.1	Q1LDZ0 Gluconate transporter
Rmet_3173	194.532	72.5232	49.2911	5.15151	YP_585314.1	Q1LII1 MltA
Rmet_0265	488.335	58.3604	124.119	21.4316	YP_582420.1	Q1LRS5 Cytochrome c oxidase, subunit III
Rmet_3108	691.152	333.71	176.45	34.395	YP_585249.1	Q1LIP6 Type II secretion system protein E
Rmet_3165	196.79	33.5625	50.2771	16.6986	YP_585306.1	Q1LII9 Phenylacetate-CoA ligase
Rmet_2726	238.482	27.4739	61.3251	29.5559	YP_584868.1	Q1LJS7 Sugar transferase
Rmet_5648	78.2051	46.24	20.1866	6.22858	YP_587776.1	Q1LBG9 Transcriptional regulator, AsnC family
Rmet_4566	433.296	124.28	113.304	7.37005	YP_586697.1	Q1LEJ8 Putative uncharacterized protein
Rmet_2864	550.422	66	145.968	111.84	YP_585006.1	Q1LJD9 ABC transporter-related protein
Rmet_0374	349.206	59.6642	93.0887	5.08042	YP_582529.1	Q1LRG6 2-octaprenylphenol hydroxylase
Rmet_2181	387.222	250.928	104.145	0.981223	YP_584329.1	Q1LLB6 Phosphate uptake regulator, PhoU
Rmet_5139	62.7957	23.4072	16.9027	0.358044	YP_587267.1	Q1LCX8 Ribonucleoside-triphosphate reductase, anaerobic
Rmet_3101	121.405	40.9098	32.7141	2.67314	YP_585242.1	Q1LIQ3 NUDIX hydrolase
Rmet_0669	142.383	11.7976	38.6124	19.3062	YP_582824.1	Q1LQM1 Response regulator receiver domain protein (CheY-like)
Rmet_2068	203.808	46.1098	56.1786	18.2967	YP_584216.1	Q1LLM9 40-residue YVTN beta-propeller repeat
Rmet_2935	382.49	13.6014	105.923	66.2498	YP_585077.1	Q1LJ68 Twitching motility protein
Rmet_0537	206.513	104.373	57.5991	12.6607	YP_582692.1	Q1LR03 MotA/TolQ/ExbB proton channel
Rmet_3901	68.401	3.00953	19.6865	1.13362	YP_586038.1	Q1LGF7 Transcriptional regulator, LysR family
Rmet_2108	200.527	85.171	58.0077	38.9248	YP_584256.1	Q1LLI9 TPR repeat
Rmet_3257	202.974	72.5786	58.8162	7.06466	YP_585398.1	Q1LI97 Mammalian cell entry related
Rmet_1427	306.267	21.7346	89.1089	10.7839	YP_583579.1	Q1LNG6 Conserved hypothetical transmembrane protein
Rmet_1826	300.154	71.5528	87.7044	49.6111	YP_583974.1	Q1LMC1 Type IV pilus assembly PilZ
Rmet_2420	619.575	258.474	182.393	127.125	YP_584566.1	Q1LKM9 Signal peptidase I
Rmet_0981	267.924	179.518	79.4074	8.31813	YP_583136.1	Q1LPQ9 N-formylglutamate amidohydrolase
Rmet_0192	380.586	6.39232	112.989	68.499	YP_582347.1	Q1LRZ8 Putative type-4 fimbrial biogenesis pily1-related protein
Rmet_0136	415.717	101.565	124.041	87.5647	YP_582291.1	Q1LS54 Sensor protein
Rmet_3384	365.409	17.9805	109.749	48.3915	YP_585525.1	Q1LHX0 General secretion pathway protein G
Rmet_0948	578.91	51.7878	174.209	61.3244	YP_583103.1	Q1LPU2 Ubiquinol oxidase, subunit II
Rmet_3589	575.532	121.967	174.107	18.1811	YP_585730.1	Q1LHB5 Hydrophobe/amphiphile efflux-1 HAE1
Rmet_4528	401.143	40.1402	121.709	9.6228	YP_586662.1	Q1LEN3 Putative nonspecific acid phosphatase
Rmet_5877	602.238	40.1118	185.367	139.304	YP_588005.1	Q1LAU0 Extracellular ligand-binding receptor
Rmet_1714	476.018	146.754	146.638	85.6594	YP_583864.1	Q1LMN1 Putative uncharacterized protein
Rmet_2954	733.686	142.702	229.101	12.7318	YP_585096.1	Q1LJ49 YceI
Rmet_3581	60.7648	10.2397	19.3061	2.09432	YP_585722.1	Q1LHC3 Secretion protein HlyD
Rmet_1779	148.959	25.8713	47.7179	5.54945	YP_583927.1	Q1LMG8 Putative uncharacterized protein
Rmet_0938	954.614	124.165	306.753	178.086	YP_583093.1	Q1LPV2 Proton-translocating NADH-quinone oxidoreductase, chain L
Rmet_2946	756.381	80.3928	243.378	87.354	YP_585088.3	Q1LJ57 Protein-export membrane protein SecD
Rmet_4216	235.709	20.5682	76.0832	47.2864	YP_586352.1	Q1LFJ3 Dihydrolipoamide dehydrogenase
Rmet_0757	277.625	106.005	89.8861	33.8024	YP_582912.1	Q1LQD3 Lipid A export ATP-binding/permease protein msbA
Rmet_0018	143.897	12.6871	47.384	17.557	YP_582173.1	Q1LSH2 Glutathione peroxidase
Rmet_5339	194.955	5.45204	64.8055	9.7843	YP_587467.1	Q1LCC8 Curli production assembly/transport component CsgG
Rmet_2796	526.95	96.8017	175.996	11.0993	YP_584938.1	Q1LJK7 Uncharacterized protein UPF0065
Rmet_5244	64.355	11.8326	21.502	1.41943	YP_587372.1	Q1LCM3 Major facilitator superfamily MFS_1
Down-regulated in the mutant, ranked by number of proteins
Rmet	MeanAE104	DevAE104	Mean∆zupT	Dev∆zupT	protein.Accession	Description
Rmet_3946	8050.38		NF/NF		YP_586083.1	Q1LGB2 Putative uncharacterized protein
Rmet_0421	5059.38	336.41	2155.76	296.778	YP_582576.1	Q1LRB9 Putative lipoprotein
Rmet_0422	4542.91	836.34	2044.28	1390.29	YP_582577.1	Q1LRB8 Putative uncharacterized protein
Rmet_0697	3637.51	493.602	698.698	90.8818	YP_582852.1	Q1LQJ3 Pilus assembly protein major pilin PilA
Rmet_4289	2813.61		745.154		YP_586424.1	Q1LFC1 Nucleoside-diphosphate-sugar epimerase
Rmet_4606	2697.81	179.971	173.504		YP_586737.1	Q1LEF8 O-acetylhomoserine/O-acetylserine sulfhydrylase
Rmet_0372	2603.47	70.262	1121.76	298.57	YP_582527.1	Q1LRG8 Import inner membrane translocase, subunit Tim44
Rmet_3473	2475.19	71.3778	1092.65	284.344	YP_585614.1	Q1LHN1 Cytochrome c, class I
Rmet_1276	2268.33		130.602	10.4376	YP_583430.1	Q1LNW5 Putative uncharacterized protein
Rmet_3228	2244.85	79.8575	859.84	315.004	YP_585369.1	Q1LIC6 Cytochrome c1
Rmet_3229	2227.93	259.632	831.182	194.301	YP_585370.1	Q1LIC5 Cytochrome b
Rmet_2945	2225.28	244.106	881.534	311.534	YP_585087.1	Q1LJ58 Protein translocase subunit yajC
Rmet_5252	2178.6	1086.06	76.1542	2.64968	YP_587380.1	Q1LCL5 Flagellin-like protein
Rmet_4851	2088.31		31.1364		YP_586982.1	Q1LDR3 L-carnitine dehydratase/bile acid-inducible protein F
Rmet_4400	2088.16	249.1	286.537	44.0791	YP_586534.1	Q1LF11 Putative uncharacterized protein
Rmet_0098	1985.95	631.86	955.653	283.847	YP_582253.1	Q1LS92 DSBA oxidoreductase
Rmet_5578	1738.01	193.691	759.015	97.063	YP_587706.1	Q1LBN9 Putative uncharacterized protein
Rmet_1665	1692.54		NF/NF		YP_583815.1	Q1LMT0 Fimbrial biogenesis outer membrane usher protein
Rmet_4774	1692.52	7.18079	427.857	329.485	YP_586905.1	Q1LDZ0 Gluconate transporter
Rmet_2867	1656.27	1008.29	590.641	458.766	YP_585009.1	Q1LJD6 Extracellular ligand-binding receptor
Rmet_3299	1634.04		3543.06		YP_585440.1	Q1LI55 50S ribosomal protein L30
Rmet_5518	1581.75		44.1351		YP_587646.1	Q1LBU9 Electron transfer flavoprotein, alpha subunit
Rmet_1119	1538.15		NF/NF		YP_583274.1	Q1LPC1 Putative FecR
Rmet_0051	1414.91	7.57469	592.896	113.864	YP_582206.1	Q0KFF6 Rod shape-determining protein MreB
Rmet_1705	1360.12	405.726	576.266	520.517	YP_583855.1	Q1LMP0 Putative uncharacterized protein
Rmet_1570	1259.31	1027.02	566.292	378.288	YP_583722.1	Q1LN23 Putative uncharacterized protein
Rmet_1260	1259.17	724.259	NF/NF		YP_583414.1	Q1LNY0 Putative uncharacterized protein
Rmet_4084	1247.81		137.135	151.504	YP_586220.1	Q1LFX5 Alkaline phosphatase
Rmet_2188	1218.4	295.863	432.562	168.58	YP_584336.1	Q1LLA9 ATP-dependent metalloprotease FtsH
Rmet_2486	1203.24		NF/NF		YP_584632.1	Q1LKG3 Succinate dehydrogenase subunit C
Rmet_1882	1191.33	177.99	589.36	234.429	YP_584030.1	Q1LM65 PpiC-type peptidyl-prolyl cis-trans isomerase
Rmet_0849	1166.18		NF/NF		YP_583004.1	Q1LQ41 17 kDa surface antigen
Rmet_4460	1157.33		NF/NF		YP_586594.1	Q1LEV1 Diguanylate cyclase/phosphodiesterase
Rmet_2099	1098.27	148.399	446.962	149.888	YP_584247.1	Q1LLJ8 HflK protein
Rmet_3925	1067.25		NF/NF		YP_586062.1	Q1LGD3 RND efflux system, outer membrane lipoprotein, NodT
Rmet_5196	1062.56	116.547	495.06	169.801	YP_587324.1	Q1LCS1 Putative uncharacterized protein
Rmet_0298	1061.5	264.303	483.912	40.822	YP_582453.1	Q1LRP2 Conserved hypothetical signal peptide protein
Rmet_0673	1035.51	280.126	110.351		YP_582828.1	Q1LQL7 CheA signal transduction histidine kinases
Rmet_5326	1015.1		431.183		YP_587454.1	Q1LCE1 Two component transcriptional regulator, winged helix family
Rmet_3613	1010.19	245.647	406.67	152.982	YP_585754.1	Q1LH91 Inner membrane protein oxaA
Rmet_4167	990.171	123.271	388.711	119.096	YP_586303.1	Q1LFP2 Toluene tolerance
Rmet_3281	989.763	9.62913	492.35	232.168	YP_585422.1	Q1LI73 Putative uncharacterized protein
Rmet_1775	954.796	747.975	21.4527		YP_583923.1	Q1LMH2 FAD linked oxidase-like protein
Rmet_0938	954.614	124.165	306.753	178.086	YP_583093.1	Q1LPV2 Proton-translocating NADH-quinone oxidoreductase, chain L
Rmet_0690	933.876	92.9015	462.201	189.411	YP_582845.1	Q1LQK0 Extracellular solute-binding protein, family 3
Rmet_3704	931.985		20.2198		YP_585845.1	Q1LH00 Porin, Gram-negative type
Rmet_4104	886.052		NF/NF		YP_586240.1	Q1LFV5 Sigma54 specific transcriptional regulator with GAF sensor, Fis family
Rmet_3297	881.829	310.308	376.036	216.546	YP_585438.1	Q1LI57 Preprotein translocase secY subunit
Rmet_2104	875.829	65.1122	391.4	168.711	YP_584252.1	Q1LLJ3 Conserved hypothetical transmembrane protein
Rmet_3231	870.324	368.81	383.495	171.748	YP_585372.1	Q1LIC3 Large-conductance mechanosensitive channel
Rmet_3566	843.262	20.118	350.929	149.262	YP_585707.1	Q1LHD8 Peptidoglycan-binding LysM
Rmet_2723	795.373	286.281	NF/NF		YP_584865.1	Q1LJT0 Polysaccharide biosynthesis protein CapD
Rmet_3234	791.957	0.0455536	350.029	19.9417	YP_585375.1	Q1LIC0 Porin, Gram-negative type
Rmet_1352	784.944	151.177	274.74	53.1592	YP_583504.1	Q1LNP1 Putative transmembrane protein
Rmet_3500	777.583	37.2018	273.743	170.578	YP_585641.1	Q1LHK4 ATP synthase A chain
Rmet_2542	772.057	152.515	79.8133	29.4647	YP_584688.1	Q1LKA7 Putative uncharacterized protein
Rmet_2477	771.535	109.6	260.712	100.688	YP_584623.1	Q1LKH2 ABC transporter-related protein
Rmet_5397	770.499	39.0203	NF/NF		YP_587525.1	Q1LC70 Polyphosphate:AMP phosphotransferase
Found in the parent but not in the mutant, ranked by the number of proteins
Rmet	MeanAE104	DevAE104	Mean∆zupT	Dev∆zupT	protein.Accession	Description
Rmet_1260	1259.17	724.259	NF/NF		YP_583414.1	Q1LNY0 Putative uncharacterized protein
Rmet_2723	795.373	286.281	NF/NF		YP_584865.1	Q1LJT0 Polysaccharide biosynthesis protein CapD
Rmet_5397	770.499	39.0203	NF/NF		YP_587525.1	Q1LC70 Polyphosphate:AMP phosphotransferase
Rmet_4997	633.623	582.538	NF/NF		YP_587128.1	Q1LDB7 Putative uncharacterized protein
Rmet_0761	566.155	282.205	NF/NF		YP_582916.1	Q1LQC9 Phosphonate C-P lyase system, PhnL
Rmet_3379	543.336	125.013	NF/NF		YP_585520.1	Q1LHX5 Transcriptional regulator, AsnC family
Rmet_2498	526.061	158.33	NF/NF		YP_584644.1	Q1LKF1 Tetratricopeptide TPR_4
Rmet_4762	410.475	38.2771	NF/NF		YP_586893.1	Q1LE02 Putative uncharacterized protein
Rmet_4594	396.034	288.467	NF/NF		YP_586725.1	Q1LEH0 Heavy metal translocating P-type ATPase, ZntA
Rmet_1561	393.654	15.2083	NF/NF		YP_583713.2	Q1LN32 Putative uncharacterized protein
Rmet_2782	393.278	70.082	NF/NF		YP_584924.1	Q1LJM1 Periplasmic binding protein
Rmet_3416	378.118	291.477	NF/NF		YP_585557.1	Q1LHT8 Transcriptional regulator, LysR family
Rmet_5940	370.356	338.247	NF/NF		YP_588068.1	Q1LAM7 Two component transcriptional regulator, LuxR family
Rmet_3664	365.698	192.79	NF/NF		YP_585805.1	Q1LH40 Exonuclease SbcC, putative
Rmet_1301	354.492	23.1924	NF/NF		YP_583455.1	Q1LNW1 Integrase, catalytic region
Rmet_2252	319.694	103.192	NF/NF		YP_584400.1	Q1LL45 Cellulose synthase operon C-like protein
Rmet_3752	307.619	210.723	NF/NF		YP_585893.1	Q1LGV2 Putative uncharacterized protein
Rmet_5852	284.705	362.878	NF/NF		YP_587980.1	Q1LAW5 Putative uncharacterized protein
Rmet_3351	279.605	237.366	NF/NF		YP_585492.1	Q1LI03 Putative uncharacterized protein
Rmet_3166	279.253	61.0993	NF/NF		YP_585307.1	Q1LII8 Transcriptional regulator, NifA subfamily, Fis family
Rmet_3280	278.556	13.6817	NF/NF		YP_585421.1	Q1LI74 Sigma-24 (FecI-like), RpoL
Rmet_4478	276.471	149.71	NF/NF		YP_586612.1	Q1LET3 ABC transporter related
Rmet_3217	261.115	160.056	NF/NF		YP_585358.1	Q1LID7 Putative transcriptional regulator
Rmet_3347	256.696	115.977	NF/NF		YP_585488.1	Q1LI07 Putative uncharacterized protein
Rmet_3900	255.5	165.642	NF/NF		YP_586037.1	Q1LGF8 Uncharacterized protein UPF0065
Rmet_1473	254.931	38.7522	NF/NF		YP_583625.1	Q1LNC0 Retron reverse transcriptase
Rmet_4909	245.614	278.521	NF/NQ		YP_587040.1	Q1LDK5 Transcriptional regulator, TetR family
Rmet_2676	238.318	149.909	NF/NF		YP_584818.1	Q1LJX7 TonB-like protein
Rmet_2242	231.382	69.5207	NF/NF		YP_584390.1	Q1LL55 Putative signal peptide protein
Rmet_1676	229.826	56.2796	NF/NF		YP_583826.1	Q1LMR9 UspA
Rmet_3393	224.279	106.086	NF/NF		YP_585534.1	Q1LHW1 Type II secretion system protein E (GspE)
Rmet_5769	214.411	107.788	NF/NF		YP_587897.1	Q1LB48 Putative uncharacterized protein
Rmet_4590	213.46	7.58752	NF/NF		YP_586721.1	Q1LEH4 Glycosyl transferase, family 2
Rmet_3269	212.185	47.0329	NF/NF		YP_585410.1	Q1LI85 Pilus assembly protein, PilQ
Rmet_4613	197.49	26.8417	NF/NF		YP_586744.1	Q1LEF1 Acyl-CoA dehydrogenase-like protein
Rmet_2534	197.286	93.2111	NF/NF		YP_584680.1	Q1LKB5 ATP-dependent transcriptional regulator, MalT-like, LuxR family
Rmet_3509	196.064	150.726	NF/NF		YP_585650.1	Q1LHJ5 Transcriptional regulator, LysR family
Rmet_1578	195.291	141.695	NF/NF		YP_583730.1	Q1LN15 Peptidase S45, penicillin amidase
Rmet_5574	195.007	173.868	NF/NF		YP_587702.1	Q1LBP3 Uncharacterized protein UPF0065
Rmet_0558	191.434	159.948	NF/NF		YP_582713.1	Q1LQY2 Glycosyl transferase, family 51
Rmet_5887	188.018	89.3589	NF/NF		YP_588015.1	Q1LAT0 2-isopropylmalate synthase
Rmet_0057	184.222	157.624	NF/NF		YP_582212.1	Q1LSD3 Tyrosine recombinase XerC subunit
Rmet_3109	183.958	75.2512	NF/NF		YP_585250.1	Q1LIP5 Type II secretion system protein
Rmet_1280	182.026	30.9676	NF/NF		YP_583434.1	Q1LNW1 Integrase, catalytic region
Rmet_1889	182.025	48.232	NF/NF		YP_584037.1	Q1LM58 Putative uncharacterized protein
Rmet_3835	178.978	31.7324	NF/NF		YP_585974.1	Q1LGM1 HpcH/HpaI aldolase
Rmet_1121	165.338	93.552	NF/NF		YP_583276.1	Q1LPB9 Hydrophobe/amphiphile efflux-1 HAE1
Rmet_0234	164.947	9.12629	NF/NF		YP_582389.1	Q1LRV6 Putative uncharacterized protein
Rmet_1174	161.369	96.1929	NF/NF		YP_583329.1	Q1LP66 Sensor protein
Rmet_0494	155.28	43.5317	NF/NF		YP_582649.1	Q1LR46 SNF2-related
Rmet_1491	154.461	137.058	NF/NF		YP_583643.1	Q6SKD6 Transposase
Rmet_2770	151.712	79.358	NF/NF		YP_584912.1	Q1LJN3 Putative lipoprotein
Rmet_2284	150.434	3.80918	NF/NF		YP_584432.1	Q1LL13 Transcriptional regulator, LysR family
Rmet_5886	146.517	112.004	NF/NF		YP_588014.1	Q1LAT1 OmpW
Rmet_2255	143.911	58.6155	NF/NF		YP_584403.1	Q1LL42 Putative uncharacterized protein
Rmet_0462	137.333	49.9782	NF/NF		YP_582617.1	Q1LR78 Major facilitator superfamily MFS_1
Rmet_2753	133.834	0.446015	NF/NF		YP_584895.1	Q1LJQ0 TRAP C4-dicarboxylate transport system permease DctM subunit
Rmet_1732	132.221	18.3142	NF/NF		YP_583880.1	Q1LML5 Transcriptional regulator, AraC family
Rmet_0454	131.227	8.79156	NF/NF		YP_582609.1	Q1LR86 Putative uncharacterized protein
Rmet_1777	129.596	69.6945	NF/NF		YP_583925.1	Q1LMH0 Na/Pi cotransporter II-related
Rmet_1221	126.653	113.604	NF/NF		YP_583376.1	Q1LP19 Benzoyl-CoA oxygenase, component B
Rmet_1944	119.405	14.5878	NF/NF		YP_584092.1	Q1LM03 Squalene/phytoene synthase
Rmet_2191	118.667	14.7664	NF/NF		YP_584339.1	Q1LLA6 Putative transmembrane protein
Rmet_5386	118.471	7.66119	NF/NF		YP_587514.1	Q1LC81 Putative uncharacterized protein
Rmet_0744	118.004	43.6327	NF/NF		YP_582899.1	Q1LQE6 TM2
Rmet_0464	115.288	97.8629	NF/NF		YP_582619.1	Q1LR76 Sensor protein
Rmet_3836	115.097	120.789	NF/NF		YP_585975.1	Q1LGM0 Outer membrane efflux protein
Rmet_5107	113.753	94.9143	NF/NF		YP_587235.1	Q1LD10 Short chain enoyl-CoA hydratase
Rmet_2800	113.011	3.08083	NF/NF		YP_584942.1	Q1LJK3 Putative uncharacterized protein
Rmet_0147	112.984	49.4147	NF/NF		YP_582302.1	Q1LS43 Peptidase M48, Ste24p
Rmet_3055	112.084	143.214	NF/NF		YP_585196.1	Q1LIU9 TonB-like protein
Rmet_0513	110.621	17.1202	NF/NF		YP_582668.1	Q1LR27 Acriflavin resistance protein
Rmet_5406	109.957	23.6939	NF/NF		YP_587534.1	Q1LC61 Putative uncharacterized protein
Rmet_0158	108.5	14.9013	NF/NF		YP_582313.1	Q1LS32 Aldehyde dehydrogenase
Rmet_0347	108.429	19.374	NF/NF		YP_582502.1	Q1LRJ3 RND efflux system, outer membrane lipoprotein, NodT
Rmet_5474	106.611	12.3318	NF/NF		YP_587602.1	Q1LBZ3 Uncharacterized protein UPF0065
Rmet_1942	105.984	88.2711	NF/NF		YP_584090.1	Q1LM05 Acriflavin resistance protein
Rmet_2876	105.408	79.8538	NF/NF		YP_585018.1	Q1LJC7 MscS Mechanosensitive ion channel
Rmet_3781	104.719	2.10117	NF/NF		YP_585920.1	Q1LGS5 Asp/Glu racemase
Rmet_1402	104.43	0.0523725	NF/NF		YP_583554.1	Q1LNJ1 Putative uncharacterized protein
Rmet_5809	104.361	5.83591	NF/NF		YP_587937.1	Q1LB08 Ribonuclease BN, putative
Rmet_1033	104.151	103.782	NF/NF		YP_583188.1	Q1LPK7 17 kDa surface antigen
Rmet_2410	103.626	24.8444	NF/NF		YP_584556.1	Q1LKN9 UvrABC system protein C
Rmet_3742	102.863	86.5194	NF/NF		YP_585883.1	Q1LGW2 Mannosyl-glycoprotein endo-beta-N-acetylglucosamidase
Rmet_5663	101.587	3.24061	NF/NF		YP_587791.1	Q1LBF4 Periplasmic phosphate binding protein
Rmet_1407	99.1486	55.1479	NF/NF		YP_583559.1	Q1LNI6 Oligopeptide/dipeptide ABC transporter, ATP-binding protein-like protein
Rmet_1943	97.5382	17.5934	NF/NF		YP_584091.1	Q1LM04 Secretion protein HlyD
Rmet_2257	96.2753	34.6257	NF/NF		YP_584405.1	Q1LL40 Putative membrane protein
Rmet_3682	96.1429	25.9453	NF/NF		YP_585823.1	Q1LH22 Methyl-accepting chemotaxis sensory transducer with Pas/Pac sensor
Rmet_0571	95.755	54.3834	NF/NF		YP_582726.1	Q1LQW9 Molybdenum ABC transporter, periplasmic molybdate-binding protein
Rmet_4109	94.8582	39.4646	NF/NF		YP_586245.1	Q1LFV0 Uncharacterized protein UPF0065
Rmet_3511	94.8499	107.695	NF/NF		YP_585652.1	Q1LHJ3 ABC transporter-related protein
Rmet_3681	92.0919	10.4007	NF/NF		YP_585822.1	Q1LH23 CheW protein
Rmet_4899	91.3117	30.8172	NF/NF		YP_587030.1	Q1LDL5 Putative uncharacterized protein
Rmet_4970	91.1438	6.05947	NF/NF		YP_587101.1	Q1LDE4 L-carnitine dehydratase/bile acid-inducible protein F
Rmet_4758	89.95	17.8058	NF/NF		YP_586889.1	Q1LE06 3,4-dihydroxy-2-butanone 4-phosphate synthase
Rmet_4510	89.4182	31.8871	NF/NF		YP_586644.1	Q1LEQ1 Secretion protein HlyD
Rmet_3456	86.7753	10.2952	NF/NF		YP_585597.1	Q1LHP8 Transcriptional regulator, MerR family
Rmet_1148	86.4481	46.8001	NF/NF		YP_583303.1	Q1LP92 Tripartite ATP-independent periplasmic transporter, DctQ component
Rmet_1066	86.4125	43.2238	NF/NF		YP_583221.1	Q1LPH4 Peptidase M50
Rmet_5667	84.4786	18.6577	NF/NF		YP_587795.1	Q1LBF0 Putative uncharacterized protein
Rmet_4078	84.3067	39.601	NF/NF		YP_586215.1	Q1LFY0 Major facilitator superfamily MFS_1
Rmet_5842	84.2706	72.7609	NF/NF		YP_587970.1	Q1LAX5 Putative uncharacterized protein
Rmet_2875	83.2066	31.1251	NF/NF		YP_585017.1	Q1LJC8 Fatty acid desaturase
Rmet_0295	83.1818	65.5335	NF/NF		YP_582450.1	Q1LRP5 A/G-specific DNA-adenine glycosylase
Rmet_3689	81.0321	18.9846	NF/NF		YP_585830.1	Q1LH15 CheA signal transduction histidine kinases
Rmet_2161	80.4873	43.2575	NF/NF		YP_584309.1	Q1LLD6 Putative uncharacterized protein
Rmet_2272	80.1405	30.0924	NF/NF		YP_584420.1	Q1LL25 Uncharacterized protein UPF0114
Rmet_3750	79.3239	0.251366	NF/NF		YP_585891.1	Q1LGV4 Putative uncharacterized protein
Rmet_2738	79.3104	55.4337	NF/NF		YP_584880.1	Q1LJR5 Lyso-ornithine lipid acyltransferase
Rmet_0791	77.9799	54.5294	NF/NF		YP_582946.1	Q1LQ99 Short-chain dehydrogenase/reductase SDR
Rmet_4191	77.7697	9.10751	NF/NF		YP_586327.1	Q1LFL8 Transcriptional regulator, LysR family
Rmet_3486	77.5129	26.2751	NF/NF		YP_585627.1	Q1LHL8 Sodium/hydrogen exchanger
Rmet_2772	76.8986	55.2804	NF/NF		YP_584914.1	Q1LJN1 Surface antigen (D15)
Rmet_5319	76.1097	41.7437	NF/NF		YP_587447.1	Q1LCE8 Heavy metal efflux pump ZniA
Rmet_5338	75.6905	11.4652	NF/NF		YP_587466.1	Q1LCC9 Putative uncharacterized protein
Rmet_3524	75.3923	11.7217	NF/NF		YP_585665.1	Q1LHI0 Heavy metal translocating P-type ATPase, CupA
Rmet_3356	75.2973	46.9665	NF/NF		YP_585497.1	Q1LHZ8 ATP-binding region, ATPase-like protein
Rmet_5708	75.0808	47.9966	NF/NF		YP_587836.1	Q1LBA9 SmpA/OmlA
Rmet_0141	74.8873	24.6308	NF/NF		YP_582296.1	Q1LS49 Pyrimidine 5-nucleotidase
Rmet_4644	74.7982	13.024	NF/NF		YP_586775.1	Q1LEC0 Carboxymuconolactone decarboxylase
Rmet_3960	74.6133	16.5336	NF/NF		YP_586097.1	Q1LG98 Putative uncharacterized protein
Rmet_5582	74.158	23.4369	NF/NF		YP_587710.1	Q1LBN5 Putative membrane protein
Rmet_0021	73.2442	2.60249	NF/NF		YP_582176.1	Q1LSG9 Peptidase M20D, amidohydrolase
Rmet_0189	72.1648	14.7455	NF/NF		YP_582344.1	Q1LS01 Type-4 fimbrial biogenesis pilV transmembrane protein
Rmet_2060	71.4085	14.1276	NF/NF		YP_584208.1	Q1LLN7 Sensor protein
Rmet_0730	71.1626	9.67897	NF/NF		YP_582885.1	Q1LQG0 Uracil-xanthine permease
Rmet_3464	69.9057	30.4823	NF/NF		YP_585605.1	Q1LHP0 HtpX peptidase. Metallo peptidase. MEROPS family M48B
Rmet_0907	69.9055	63.4414	NF/NF		YP_583062.1	Q1LPY3 RDD domain protein
Rmet_1925	69.3029	24.8911	NF/NF		YP_584073.1	Q1LM22 Putative uncharacterized protein
Rmet_3091	68.0161	36.1098	NF/NF		YP_585232.1	Q1LIR3 Sensor protein
Rmet_3861	67.0405	60.9051	NF/NF		YP_585998.1	Q1LGJ7 Rhomboid-like protein
Rmet_0671	66.0953	5.41757	NF/NF		YP_582826.1	Q1LQL9 CheW protein
Rmet_3921	65.5811	32.2351	NF/NF		YP_586058.1	Q1LGD7 Putative uncharacterized protein
Rmet_2069	65.1454	29.8293	NF/NF		YP_584217.1	Q1LLM8 ATP-dependent helicase HrpA
Rmet_5557	64.0361	19.8824	NF/NF		YP_587685.1	Q1LBR0 Short chain enoyl-CoA hydratase
Rmet_3940	63.9171	31.0367	NF/NF		YP_586077.1	Q1LGB8 Transcriptional regulator, LysR family
Rmet_0884	63.9158	13.8846	NF/NF		YP_583039.1	Q1LQ06 Transcriptional regulator, GntR family
Rmet_2253	63.5196	44.4271	NF/NF		YP_584401.1	Q1LL44 Putative uncharacterized protein
Rmet_4614	62.0601	32.864	NF/NF		YP_586745.1	Q1LEF0 Short-chain dehydrogenase/reductase SDR
Rmet_2677	61.946	1.84236	NF/NF		YP_584819.1	Q1LJX6 Biopolymer transport protein ExbD/TolR
Rmet_3488	61.2058	37.2651	NF/NF		YP_585629.1	Q1LHL6 Extracellular ligand-binding receptor
Rmet_2802	59.7378	42.8239	NF/NF		YP_584944.1	Q1LJK1 Prolipoprotein diacylglyceryl transferase
Rmet_2027	59.6858	15.5407	NF/NF		YP_584175.1	Q1LLS0 Secretion protein HlyD
Rmet_3161	59.5167	30.6989	NF/NF		YP_585302.1	Q1LIJ3 Putative uncharacterized protein
Rmet_2771	59.3594	7.96698	NF/NF		YP_584913.1	Q1LJN2 Putative uncharacterized protein
Rmet_4017	59.2811	61.9488	NF/NF		YP_586154.1	Q1LG41 Transcriptional regulator, AraC family
Rmet_3258	59.117	35.6514	NF/NF		YP_585399.1	Q1LI96 Putative uncharacterized protein
Rmet_1627	59.0377	27.2893	NF/NF		YP_583779.1	Q1LMW6 Two component transcriptional regulator, winged helix family
Rmet_4527	58.6476	5.22146	NF/NF		YP_586661.1	Q1LEN4 Spermine synthase
Rmet_5799	58.5184	2.4952	NF/NF		YP_587927.1	Q1LB18 Glucokinase
Rmet_4847	58.4173	10.743	NF/NF		YP_586978.1	Q1LDR7 YidE/YbjL duplication
Rmet_3972	58.3637	4.75021	NF/NF		YP_586109.1	Q1LG86 CheW protein
Rmet_2865	57.3378	2.67569	NF/NF		YP_585007.1	Q1LJD8 Inner-membrane translocator
Rmet_5403	57.0346	39.7467	NF/NF		YP_587531.1	Q1LC64 Putative uncharacterized protein
Rmet_0516	56.7189	24.4317	NF/NF		YP_582671.1	Q1LR24 Sensor protein
Rmet_0546	54.7996	24.4093	NF/NF		YP_582701.1	Q1LQZ4 3-hydroxybutyrate dehydrogenase
Rmet_5492	54.6938	4.46476	NF/NF		YP_587620.1	Q1LBX5 Fumarate reductase/succinate dehydrogenase flavoprotein-like protein
Rmet_4954	54.4977	9.74786	NF/NF		YP_587085.1	Q1LDG0 Transcriptional regulator, GntR family
Rmet_2162	53.8146	45.3609	NF/NF		YP_584310.1	Q1LLD5 Putative uncharacterized protein
Rmet_2307	53.6226	18.0925	NF/NF		YP_584455.1	Q8GQ18 Putative uncharacterized protein ORF C93
Rmet_2396	53.5601	3.71318	NF/NF		YP_584542.1	Q8GQA2 Putative thiol:disulfide interchange protein
Rmet_5779	52.0449	3.55371	NF/NF		YP_587907.1	Q1LB38 Putative uncharacterized protein
Rmet_3678	51.7517	14.1485	NF/NF		YP_585819.1	Q1LH26 Methyl-accepting chemotaxis sensory transducer
Rmet_3730	51.3087	15.2689	NF/NF		YP_585871.1	Q1LGX4 Putative transmembrane protein
Rmet_5617	51.1917	15.7491	NF/NF		YP_587745.1	Q1LBK0 Farnesyl-diphosphate farnesyltransferase
Rmet_4947	51.1604	4.77989	NF/NF		YP_587078.1	Q1LDG7 Uncharacterized protein UPF0065
Rmet_5882	51.1363	14.7931	NF/NF		YP_588010.1	Q1LAT5 Uncharacterized protein UPF0065
Rmet_2145	50.538	13.8257	NF/NF		YP_584293.1	Q1LLF2 Binding-protein-dependent transport systems inner membrane component
Rmet_2026	50.4658	5.97537	NF/NF		YP_584174.1	Q1LLS1 RND efflux system, outer membrane lipoprotein, NodT
Rmet_1948	50.4576	19.0614	NF/NF		YP_584096.1	Q1LLZ9 Sensor protein
Rmet_0588	50.1328	19.3781	NF/NF		YP_582743.1	Q1LQV2 Two component, sigma54 specific, transcriptional regulator, Fis family
Rmet_3129	49.7342	1.66704	NF/NF		YP_585270.1	Q1LIM5 Cell cycle protein
Rmet_3607	48.9518	4.92608	NF/NF		YP_585748.1	Q1LH97 Putative uncharacterized protein
Rmet_2120	47.8904	12.1224	NF/NF		YP_584268.1	Q1LLH7 Binding-protein-dependent transport systems inner membrane component
Rmet_3188	47.8603	14.9711	NF/NF		YP_585329.1	Q1LIG6 Peptidase M61
Rmet_3693	47.2057	9.34138	NF/NF		YP_585834.1	Q1LH11 Chemotaxis response regulator protein-glutamate methylesterase 1
Rmet_1049	46.2719	3.69418	NF/NF		YP_583204.1	Q1LPJ1 Transglutaminase-like protein
Rmet_5494	45.8768	2.44072	NF/NF		YP_587622.1	Q1LBX3 Uncharacterized protein UPF0065
Rmet_2516	45.8753	10.0374	NF/NF		YP_584662.1	Q1LKD3 ABC transporter-related protein
Rmet_2225	45.8128	19.5666	NF/NF		YP_584373.1	Q1LL72 Isochorismatase hydrolase
Rmet_0698	45.4868	18.4257	NF/NF		YP_582853.1	Q1LQJ2 Putative uncharacterized protein
Rmet_0155	45.1303	12.1592	NF/NF		YP_582310.1	Q1LS35 Lipid A biosynthesis acyltransferase
Rmet_1462	44.9389	12.5231	NF/NF		YP_583614.1	Q1LND1 Putative transmembrane protein
Rmet_3256	44.9171	13.762	NF/NF		YP_585397.1	Q1LI98 VacJ-like lipoprotein
Rmet_5240	44.6003	1.69011	NF/NF		YP_587368.1	Q1LCM7 Methyltransferase type 12
Rmet_2277	44.4771	1.21523	NF/NF		YP_584425.1	Q1LL20 TonB-like protein
Rmet_4920	42.7679	14.5096	NF/NF		YP_587051.1	Q1LDJ4 Phospholipid/glycerol acyltransferase
Rmet_2801	42.743	16.3069	NF/NF		YP_584943.1	Q1LJK2 Peptidase M48, Ste24p
Rmet_4229	42.6224	5.24243	NF/NF		YP_586365.1	Q9F8S6 Transposase (Transposase, IS4 family)
Rmet_2457	42.3572	5.96028	NF/NF		YP_584603.1	Q1LKJ2 Nod factor export ATP-binding protein I
Rmet_3406	41.7951	5.22248	NF/NF		YP_585547.1	Q1LHU8 Cation diffusion facilitator family transporter
Rmet_5297	41.6071	16.5868	NF/NF		YP_587425.1	Q1LCH0 Flagellar basal body-associated protein FliL
Rmet_5487	41.4588	1.43928	NF/NF		YP_587615.1	Q1LBY0 Superfamily I DNA and RNA helicases-like protein
Rmet_3389	41.074	12.8244	NF/NF		YP_585530.1	Q1LHW5 General secretion pathway L
Rmet_5860	40.2061	0.685109	NF/NF		YP_587988.1	Q1LAV7 GDP-mannose 4,6-dehydratase
Rmet_2507	40.1084	11.4653	NF/NF		YP_584653.1	Q1LKE2 Transcriptional regulator, GntR family
Rmet_1230	40.0778	4.70387	NF/NF		YP_583385.1	Q1LP10 ABC transporter-related protein
Rmet_1736	39.9744	1.68626	NF/NF		YP_583884.1	Q1LML1 Cytochrome B561
Rmet_3583	39.6641	7.56656	NF/NF		YP_585724.1	Q1LHC1 Putative uncharacterized protein
Rmet_5022	39.6171	8.61486	NF/NF		YP_587153.1	Q1LD92 ATP-dependent transcriptional regulator, MalT-like, LuxR family
Rmet_4512	39.2352	2.3399	NF/NF		YP_586646.1	Q1LEP9 Outer membrane efflux protein
Rmet_4006	38.879	3.56873	NF/NF		YP_586143.1	Q1LG52 Putative uncharacterized protein
Rmet_4433	38.6571	5.76778	NF/NF		YP_586567.1	Q1LEX8 Uncharacterized protein UPF0065
Rmet_3870	38.5306	2.26751	NF/NF		YP_586007.1	Q1LGI8 Transcriptional regulator, LysR family
Rmet_1900	38.3822	6.91091	NF/NF		YP_584048.1	Q1LM47 Transcriptional regulator, LysR family
Rmet_0391	38.2424	2.77252	NF/NF		YP_582546.1	Q1LRE9 ABC transporter-related protein, AtmA
Rmet_5923	37.9284	0.534409	NF/NF		YP_588051.1	Q1LAP4 Putative transmembrane protein
Rmet_0664	37.7505	13.0707	NF/NF		YP_582819.1	Q1LQM6 Putative uncharacterized protein
Rmet_0036	37.6604	18.6413	NF/NF		YP_582191.1	Q1LSF4 Mg2+ transporter protein, CorA-like protein, CorA2
Rmet_3737	37.403	4.83507	NF/NF		YP_585878.1	Q1LGW7 Putative uncharacterized protein
Rmet_0350	37.123	33.2228	NF/NF		YP_582505.1	Q1LRJ0 Secretion protein HlyD
Rmet_5631	36.9864	16.8779	NF/NF		YP_587759.1	Q1LBI6 Transcriptional regulator, GntR family
Rmet_3287	36.7917	4.87994	NF/NF		YP_585428.1	Q1LI67 Mg2+ transporter protein, CorA-like protein, CorA3
Rmet_3719	36.6925	11.3848	NF/NF		YP_585860.1	Q1LGY5 Transcriptional regulator, LysR family
Rmet_0377	36.6117	20.8341	NF/NF		YP_582532.1	Q1LRG3 Putative uncharacterized protein
Rmet_2775	36.447	10.1538	NF/NF		YP_584917.1	Q1LJM8 PepSY-associated TM helix
Rmet_1599	36.3461	10.0478	NF/NF		YP_583751.1	Q1LMZ4 Cytochrome c, class I
Rmet_3252	36.3415	6.65579	NF/NF		YP_585393.1	Q1LIA2 ABC-type multidrug transport system permease component
Rmet_3508	35.8141	1.73945	NF/NF		YP_585649.1	Q1LHJ6 Uncharacterized protein UPF0065
Rmet_2777	35.6094	13.2782	NF/NF		YP_584919.1	Q1LJM6 Cobyrinic acid a,c-diamide synthase
Rmet_1646	35.3193	19.6092	NF/NF		YP_583798.1	Q1LMU7 MscS Mechanosensitive ion channel
Rmet_4077	35.0915	3.228	NF/NF		YP_586214.1	Q1LFY1 TRAP transporter solute receptor, TAXI family
Rmet_0740	35.0903	13.6262	NF/NF		YP_582895.1	Q1LQF0 D-amino acid dehydrogenase small subunit
Rmet_3950	35.0077	13.9947	NF/NF		YP_586087.1	Q1LGA8 Major facilitator superfamily MFS_1
Rmet_1185	34.553	11.7889	NF/NF		YP_583340.1	Q1LP55 Transcriptional regulator, LysR family
Rmet_3239	34.4672	1.88645	NF/NF		YP_585380.1	Q1LIB5 Putative transmembrane protein
Rmet_1171	34.2595	17.7722	NF/NF		YP_583326.1	Q9F8S6 Transposase (Transposase, IS4 family)
Rmet_4876	34.2515	3.57213	NF/NF		YP_587007.1	Q1LDN8 Uncharacterized protein UPF0065
Rmet_1425	33.4495	9.34257	NF/NF		YP_583577.1	Q1LNG8 Putative uncharacterized protein
Rmet_1051	33.1885	1.44462	NF/NF		YP_583206.1	Q1LPI9 Alpha/beta hydrolase fold
Rmet_2857	32.7412	0.14825	NF/NF		YP_584999.1	Q1LJE6 ABC transporter-related protein
Rmet_3938	31.1099	7.3424	NF/NF		YP_586075.1	Q1LGC0 Cobyrinate a,c-diamide synthase / hydrogenobyrinic acid a,c-diamide synthase (Glutamine-hydrolysing)
Rmet_5847	29.6029	7.0708	NF/NF		YP_587975.1	Q1LAX0 Short-chain dehydrogenase/reductase SDR
Rmet_0022	29.2071	7.31969	NF/NF		YP_582177.1	Q1LSG8 Transcriptional regulator, AraC family
Rmet_3394	29.0456	2.243	NF/NF		YP_585535.1	Q1LHW0 General secretion pathway protein F
Rmet_2781	28.7824	2.53365	NF/NF		YP_584923.1	Q1LJM2 Aminotransferase
Rmet_4881	28.6725	4.18372	NF/NF		YP_587012.1	Q1LDN3 Catechol 1,2-dioxygenase
Rmet_1715	28.0703	16.3069	NF/NF		YP_583865.1	Q1LMN0 Transcriptional regulator, AraC family
Rmet_0592	26.415	9.02329	NF/NF		YP_582747.1	Q1LQU8 Putative uncharacterized protein
Rmet_0457	25.9513	7.85939	NF/NF		YP_582612.1	Q1LR83 Aminoglycoside phosphotransferase
Rmet_5405	25.877	1.69794	NF/NF		YP_587533.1	Q1LC62 Putative periplasmic protein
Rmet_5602	25.6268	6.40153	NF/NF		YP_587730.1	Q1LBL5 L-threonine ammonia-lyase
Rmet_2371	25.389	13.5327	NF/NF		YP_584517.1	Q8GQ81 Putative uncharacterized protein ORF C29
Rmet_4185	25.3809	17.4474	NF/NF		YP_586321.1	Q1LFM4 Methyl-accepting chemotaxis sensory transducer
Rmet_0329	25.1225	8.92739	NF/NF		YP_582484.1	Q1LRL1 Arsenate reductase
Rmet_4782	24.6824	5.12672	NF/NF		YP_586913.1	Q1LDY2 Twin-arginine translocation pathway signal
Rmet_2593	24.4382	11.766	NF/NF		YP_584739.1	Q1LK56 Glycosyl transferase, family 28
Rmet_3195	24.2659	4.66277	NF/NF		YP_585336.1	Q1LIF9 Putative membrane protein
Rmet_0196	24.0428	5.03723	NF/NF		YP_582351.1	Q1LRZ4 GCN5-related N-acetyltransferase
Rmet_5256	23.9678	3.83241	NF/NF		YP_587384.1	Q1LCL1 Flagellar protein FliT
Rmet_4351	23.6627	4.64097	NF/NF		YP_586485.1	Q1LF60 Putative uncharacterized protein
Rmet_1303	23.5763	7.99697	NF/NF		YP_583457.1	Q1LNT8 Transposase IS3/IS911
Rmet_1112	22.3704	10.7031	NF/NF		YP_583267.1	Q1LPC8 IucA/IucC
Rmet_3880	21.8872	5.4037	NF/NF		YP_586017.1	Q1LGH8 Putative uncharacterized protein
Rmet_2919	21.5876	2.79979	NF/NF		YP_585061.1	Q1LJ84 ABC transporter-related protein
Rmet_3080	19.0297	11.395	NF/NF		YP_585221.1	Q1LIS4 4-oxalocrotonate tautomerase
Rmet_5684	17.8657	2.83802	NF/NF		YP_587812.1	Q1LBD3 Pilus assembly protein PilE
Rmet_1717	14.8163	2.08871	NF/NF		YP_583867.1	Q1LMM8 Taurine catabolism dioxygenase TauD/TfdA
Rmet_5430	14.7826	1.50529	NF/NF		YP_587558.1	Q1LC37 Lipid A biosynthesis acyltransferase
Rmet_0611	12.8616	0.841001	NF/NF		YP_582766.1	Q1LQS9 Transcriptional regulator, TetR family

## Sheet: Hydrogenase region
Comparison of strain AE104 and its mutant, predicted numbers per cell. NeF, never found; NF not found; NQ, not quantified. Red numbers show down-regulation between AE104/CH34 and ∆zupT/AE104, respectively, and green numbers
up-regulation (2-fold). Numbers in italics indicate not significant differences, overlapping deviation bars of the values or proteins found only in one strain. An operon region are all gene on the same DNA strand without interruption
Rmet	MeanAE104	DevAE104	Mean∆zupT	Dev∆zupT	operon region	Description
Rmet_1492	NeF		NeF		Op0422r	Q1LNA1 Fructose-bisphosphate aldolase
Rmet_1493					Op0422r	Q1LNA0 Putative uncharacterized protein
Rmet_1494					Op0422r	Q1LN99 Putative uncharacterized protein
Rmet_1495					Op0422r	Q1LN98 Putative uncharacterized protein
Rmet_1496	NF/NF		NF/NF		Op0422r	Q1LN97 Putative uncharacterized protein
Rmet_1497	NF/NF		143.504	10.2385	Op0422r	Q1LN96 Putative uncharacterized protein
Rmet_1498	NF/NF		169.264	38.1068	Op0422r	Q1LN95 von Willebrand factor, type A
Rmet_1499	NF/NF		432.64	315.373	Op0422r	Q1LN94 ATPase associated with various cellular activities, AAA_5
Rmet_1500	NF/NF		1688.97	1619.44	Op0422r	Q1LN93 Ribulose bisphosphate carboxylase small chain
Rmet_1501	69.5999		6269.19	139.106	Op0422r	Q1LN92 Ribulose bisphosphate carboxylase large chain
Rmet_1502	NF/NF		289.67		Op0423f	Q1LN91 Transcriptional regulator, LysR family
Rmet_1503	NF/NF		NF/NQ		Op0423f	Q9RBF5 Ralstonia eutropha insertion sequence IS1090
Rmet_1504					Op0424r	Q1LN89 Putative uncharacterized protein
Rmet_1505					Op0424r	Q1LN88 ISSod11, transposase
Rmet_1506	NF/NQ		NF/NF		Op0424r	Q6SKD6 Transposase
Rmet_1507	NeF		NeF		Op0424r	Q1LN86 D-fructose 1,6-bisphosphatase
Rmet_1508	NF/NF		46.9814		Op0424r	Q1LN85 Transcriptional regulator, LysR family
Rmet_1509					Op0425f	Q1LN84 Putative uncharacterized protein
Rmet_1510	NF/NF		31.6561		Op0425f	Q1LN83 Ribulose-5-phosphate 3-epimerase
Rmet_1511	NF/NF		237.115	199.662	Op0425f	Q1LN82 D-fructose 1,6-bisphosphatase
Rmet_1512	NF/NF		531.433	22.7037	Op0425f	Q1LN81 Phosphoribulokinase
Rmet_1513	NF/NF		327.371	150.618	Op0425f	Q1LN80 Transketolase
Rmet_1514	163.343		119.982	24.2504	Op0425f	Q1LN79 Phosphoglycolate phosphatase
Rmet_1515	62.4441	16.3863	573.494	497.23	Op0425f	Q1LN78 Glyceraldehyde-3-phosphate dehydrogenase
Rmet_1516	276.617	189.511	150.895	28.3686	Op0425f	Q1LN77 Phosphoglycerate kinase
Rmet_1517	NF/NF		60.5439		Op0425f	Q1LN76 HAD-superfamily hydrolase subfamily IA, variant 3
Rmet_1518	68.0886	33.1869	190.524	129.799	Op0425f	Q1LN75 Fructose-bisphosphate aldolase
Rmet_1519	NeF		NeF		Op0425f	Q1LN74 Pyruvate kinase
Rmet_1520	NF/NF		101.277	12.6203	Op0425f	Q1LN73 Triosephosphate isomerase
Rmet_1521	NF/NF		76.4365	13.7853	Op0425f	Q1LN72 Ribose-5-phosphate isomerase
Rmet_1522	NF/NF		1694.21	1662.2	Op0425f	Q1LN71 Respiratory-chain NADH dehydrogenase domain, 51 kDa subunit
Rmet_1523	NF/NF		1098.46	988.508	Op0425f	Q1LN70 Ferredoxin
Rmet_1524	NF/NF		1854.56	67.3005	Op0425f	Q1LN69 NADH ubiquinone oxidoreductase, 20 kDa subunit
Rmet_1525	33.6964		4610.69	84.1668	Op0425f	Q1LN68 Nickel-dependent hydrogenase, large subunit
Rmet_1526	NF/NF		1765.93	36.8367	Op0425f	Q1LN67 HoxW protein
Rmet_1527	NF/NF		8604.71	318.777	Op0425f	Q1LN66 Cyclic nucleotide-binding domain (CNMP-BD) protein
Rmet_1528					Op0425f	Q1LN65 Alanine dehydrogenase/PNT-like protein
Rmet_1529	NF/NF		372.59	48.9387	Op0426r	Q1LB62 Integrase, catalytic region
Rmet_1530					Op0427f	Q1LN63 Alanine dehydrogenase/PNT-like protein
Rmet_1531					Op0427f	Q1LN62 Pyridine nucleotide transhydrogenase subunit alpha
Rmet_1532	NeF		NeF		Op0427f	Q1LN61 NAD(P) transhydrogenase, beta subunit
Rmet_1533	NeF		NeF		Op0427f	Q1LN60 High-affinity nickel-transporter
Rmet_1534					Op0427f	Q1LN59 Putative uncharacterized protein
Rmet_1535	NF/NF		622.176	77.3396	Op0427f	Q1LN58 Hydrogenase nickel insertion protein HypA
Rmet_1536	NF/NF		5295.4	248.717	Op0427f	Q1LN57 Hydrogenase accessory protein HypB
Rmet_1537	NF/NF		504.128	33.339	Op0427f	Q1LN56 (NiFe) hydrogenase maturation protein HypF
Rmet_1538	NeF		NeF		Op0427f	Q1LN55 Hydrogenase assembly chaperone hypC/hupF
Rmet_1539	NF/NF		492.957	29.2577	Op0427f	Q1LN54 Hydrogenase expression/formation protein HypD
Rmet_1540	NF/NF		2965.32	148.769	Op0427f	Q1LN53 Hydrogenase expression/formation protein HypE
Rmet_1541	NF/NF		370.856	61.3717	Op0427f	Q1LN52 Formyl transferase-like protein
Rmet_1542	608.479	40.7109	240.158		Op0427f	Q1LN51 Response regulator receiver domain protein (CheY-like)
TOTAL	1282.27		41933.1

## Sheet: KEGG
Comparison of strain AE104 and its mutant, predicted numbers per cell. NeF, never found; NF not found; NQ, not quantified. Red numbers show down-regulation between AE104/CH34 and ∆zupT/AE104, respectively, and green numbers
up-regulation (2-fold). Numbers in italics indicate not significant differences, overlapping deviation bars of the values or proteins found only in one strain.
Rmet	MeanAE104	DevAE104	Mean∆zupT	Dev∆zupT	protein.Accession	Description
						Glyoxylate and dicarboxylate metabolism [PATH:ko00630]
Rmet_0554	NF/NF		83.3519		YP_582709.1	Q1LQY6 Respiratory-chain NADH dehydrogenase domain, 51 kDa subunit
Rmet_0557	NF/NF		203.633	247.161	YP_582712.1	Q1LQY3 Formate dehydrogenase delta subunit
Rmet_1500	NF/NF		1688.97	1619.44	YP_583652.1	Q1LN93 Ribulose bisphosphate carboxylase small chain
Rmet_1501	69.5999		6269.19	139.106	YP_583653.1	Q1LN92 Ribulose bisphosphate carboxylase large chain
Rmet_1522	NF/NF		1694.21	1662.2	YP_583674.1	Q1LN71 Respiratory-chain NADH dehydrogenase domain, 51 kDa subunit
Rmet_1523	NF/NF		1098.46	988.508	YP_583675.1	Q1LN70 Ferredoxin
Rmet_1524	NF/NF		1854.56	67.3005	YP_583676.1	Q1LN69 NADH ubiquinone oxidoreductase, 20 kDa subunit
Rmet_1525	33.6964		4610.69	84.1668	YP_583677.1	Q1LN68 Nickel-dependent hydrogenase, large subunit
						Glyoxylate and dicarboxylate metabolism [PATH:ko00630]
Rmet_3912	NF/NF		20.8176		YP_586049.1	Q1LGE6 Phosphoglycerate mutase
Rmet_5859	NF/NF		59.8204		YP_587987.1	Q1LAV8 NAD-dependent epimerase/dehydratase
						Glycerophospholipid metabolism [PATH:ko00564]
Rmet_0383	123.765		NF/NF		YP_582538.1	Q1LRF7 Phospholipase D/Transphosphatidylase
Rmet_1006	25.1933		NF/NF		YP_583161.1	Q1LPN4 Putative phospholipase
Rmet_2051	61.0162	17.7205	17.4278		YP_584199.1	Q1LLP6 Glycerophosphoryl diester phosphodiesterase
Rmet_2204	79.1153		NF/NF		YP_584352.1	Q1LL93 Glycerophosphoryl diester phosphodiesterase
Rmet_4116	121.871	25.7461	56.9533	5.31604	YP_586252.1	Q1LFU3 Phosphatidylserine decarboxylase
Rmet_5614	318.138		NF/NF		YP_587742.1	Q1LBK3 Putative CDP-diacylglycerol pyrophosphatase
						Androgen and estrogen metabolism [PATH:ko00150]
Rmet_5416	543.474	249.444	351.425	127.188	YP_587544.1	Q1LC51 Sulfatase@(0)arylsulfatase [EC:3.1.6.1]
						Glycerolipid metabolism [PATH:ko00561]
Rmet_0444	56.2815	7.07253	27.5326	0.66288	YP_582599.1	Q1LR96 Phospholipid/glycerol acyltransferase
Rmet_2738	79.3104	55.4337	NF/NF		YP_584880.1	Q1LJR5 Lyso-ornithine lipid acyltransferase
Rmet_5445	58.992		NF/NF		YP_587573.1	Q1LC22 Carbohydrate kinase, FGGY
						Taurine and hypotaurine metabolism [PATH:ko00430]
Rmet_1717	14.8163	2.08871	NF/NF		YP_583867.1	Q1LMM8 Taurine catabolism dioxygenase TauD/TfdA
Rmet_4136	30.692		NF/NF		YP_586272.1	Q1LFS3 Taurine catabolism dioxygenase TauD/TfdA
						Peptidoglycan biosynthesis [PATH:ko00550]
Rmet_2705	425.812	113.618	180.652	23.433	YP_584847.1	Q1LJU8 Undecaprenyl-diphosphatase
						Terpenoid biosynthesis [PATH:ko00900]
Rmet_1439	202.816	44.7326	466.831	273.511	YP_583591.1	Q1LNF4 Undecaprenyl pyrophosphate synthetase
						Toluene and xylene degradation [PATH:ko00622]
Rmet_1318	240.395		NF/NF		YP_583470.1	Q1LNS5 Hydratase/decarboxylase
Rmet_1782	131.556		NF/NF		YP_583930.1	Q1LMG5 Oxidoreductase FAD/NAD(P)-binding
Rmet_1786	218.316	72.5106	27.1479		YP_583934.1	Q1LMG1 Methane/phenol/toluene hydroxylase
Rmet_4881	28.6725	4.18372	NF/NF		YP_587012.1	Q1LDN3 Catechol 1,2-dioxygenase
						Benzoate degradation via CoA ligation [PATH:ko00632]
Rmet_4883	35.1411		86.3612		YP_587014.1	Q1LDN1 Benzoate 1,2-dioxygenase, beta subunit
						Carbazole degradation [PATH:ko00629]
Rmet_2198	41.766		144.504		YP_584346.1	Q1LL99 AMP-dependent synthetase and ligase
						Type II secretion system [PATH:ko03090]
Rmet_0189	72.1648	14.7455	NF/NF		YP_582344.1	Q1LS01 Type-4 fimbrial biogenesis pilV transmembrane protein
Rmet_0190	52.8014		NF/NF		YP_582345.1	Q1LS00 Type-4 fimbrial biogenesis transmembrane protein
Rmet_0192	380.586	6.39232	112.989	68.499	YP_582347.1	Q1LRZ8 Putative type-4 fimbrial biogenesis pily1-related protein
Rmet_0669	142.383	11.7976	38.6124	19.3062	YP_582824.1	Q1LQM1 Response regulator receiver domain protein (CheY-like)
Rmet_0671	66.0953	5.41757	NF/NF		YP_582826.1	Q1LQL9 CheW protein
Rmet_0672	734.162	198.16	134.914	37.6066	YP_582827.1	Q1LQL8 Methyl-accepting chemotaxis sensory transducer
Rmet_0673	1035.51	280.126	110.351		YP_582828.1	Q1LQL7 CheA signal transduction histidine kinases
Rmet_0697	3637.51	493.602	698.698	90.8818	YP_582852.1	Q1LQJ3 Pilus assembly protein major pilin PilA
Rmet_1826	300.154	71.5528	87.7044	49.6111	YP_583974.1	Q1LMC1 Type IV pilus assembly PilZ
Rmet_2108	200.527	85.171	58.0077	38.9248	YP_584256.1	Q1LLI9 TPR repeat
Rmet_2683	257.357		NF/NF		YP_584825.1	Q1LJX0 Putative transmembrane protein
Rmet_2935	382.49	13.6014	105.923	66.2498	YP_585077.1	Q1LJ68 Twitching motility protein
Rmet_2936	496.056	223.224	62.8728	14.813	YP_585078.1	Q1LJ67 Twitching motility protein
Rmet_3091	68.0161	36.1098	NF/NF		YP_585232.1	Q1LIR3 Sensor protein
Rmet_3108	691.152	333.71	176.45	34.395	YP_585249.1	Q1LIP6 Type II secretion system protein E
Rmet_3109	183.958	75.2512	NF/NF		YP_585250.1	Q1LIP5 Type II secretion system protein
Rmet_3269	212.185	47.0329	NF/NF		YP_585410.1	Q1LI85 Pilus assembly protein, PilQ
Rmet_3270	250.933	80.1374	12.8051		YP_585411.1	Q1LI84 Pilus assembly protein, PilO
Rmet_3271	380.29	66.9496	18.0154		YP_585412.1	Q1LI83 Fimbrial assembly
Rmet_3272	288.025	23.1831	54.0781		YP_585413.1	Q1LI82 Type IV pilus assembly protein PilM
Rmet_3384	365.409	17.9805	109.749	48.3915	YP_585525.1	Q1LHX0 General secretion pathway protein G
Rmet_3385	221.919		NF/NF		YP_585526.1	Q1LHW9 General secretion pathway protein H
Rmet_3389	41.074	12.8244	NF/NF		YP_585530.1	Q1LHW5 General secretion pathway L
Rmet_3393	224.279	106.086	NF/NF		YP_585534.1	Q1LHW1 Type II secretion system protein E (GspE)
Rmet_3394	29.0456	2.243	NF/NF		YP_585535.1	Q1LHW0 General secretion pathway protein F
Rmet_3656	104.33	81.6988	34.7392		YP_585797.1	Q1LH48 Type II secretion system protein E
Rmet_4705	143.662		NF/NF		YP_586836.1	Q1LE59 Secretory pathway pseudopilin PulG
Rmet_5684	17.8657	2.83802	NF/NF		YP_587812.1	Q1LBD3 Pilus assembly protein PilE
						Type IV secretion system [PATH:ko03080]
Rmet_1553	NF/NF		132.738		YP_583705.1	Q1LN40 ATPase
						Pores ion channels
Rmet_0036	37.6604	18.6413	NF/NF		YP_582191.1	Q1LSF4 Mg2+ transporter protein, CorA2
Rmet_1118	209.063	4.53066	83.6655	17.7274	YP_583273.1	Q1LPC2 TonB-dependent siderophore receptor
Rmet_2676	238.318	149.909	NF/NF		YP_584818.1	Q1LJX7 TonB-like protein
Rmet_2789	534.56	44.1487	235.093	54.4315	YP_584931.1	Q1LJL4 TonB-dependent receptor, plug
Rmet_3052	117.267	8.058	50.087	4.47305	YP_585193.1	Q1LIV2 Magnesium and cobalt transport protein CorA1
Rmet_3231	870.324	368.81	383.495	171.748	YP_585372.1	Q1LIC3 Large-conductance mechanosensitive channel
Rmet_3287	36.7917	4.87994	NF/NF		YP_585428.1	Q1LI67 Mg2+ transporter protein, CorA3
Rmet_5373	71.9786		NF/NF		YP_587501.1	Q1LC94 TonB-dependent receptor
						Other ion-coupled transporters
Rmet_0312	198.957	10.3994	42.2364	3.66703	YP_582467.1	Q1LRM8 Na/Pi cotransporter II-related
Rmet_0513	110.621	17.1202	NF/NF		YP_582668.1	Q1LR27 Acriflavin resistance protein
Rmet_0730	71.1626	9.67897	NF/NF		YP_582885.1	Q1LQG0 Uracil-xanthine permease
Rmet_1121	165.338	93.552	NF/NF		YP_583276.1	Q1LPB9 Hydrophobe/amphiphile efflux-1 HAE1
Rmet_1702	226.202	138.178	36.9539		YP_583852.1	Q1LMP3 Hydrophobe/amphiphile efflux-1 HAE1
Rmet_1777	129.596	69.6945	NF/NF		YP_583925.1	Q1LMH0 Na/Pi cotransporter II-related
Rmet_2285	37.8426		NF/NF		YP_584433.1	Q1LL12 Sodium/hydrogen exchanger
Rmet_3406	41.7951	5.22248	NF/NF		YP_585547.1	Q1LHU8 Cation diffusion facilitator family transporter FieF
Rmet_3589	575.532	121.967	174.107	18.1811	YP_585730.1	Q1LHB5 Hydrophobe/amphiphile efflux-1 HAE1
Rmet_4123	181.785	111.86	55.3711		YP_586259.1	Q1LFT6 Heavy metal efflux pump HmyA
Rmet_4774	1692.52	7.18079	427.857	329.485	YP_586905.1	Q1LDZ0 Gluconate transporter
Rmet_5319	76.1097	41.7437	NF/NF		YP_587447.1	Q1LCE8 Heavy metal efflux pump ZniA
						Other transporters
Rmet_0685	350.5	165.688	85.6015	25.1773	YP_582840.1	Q1LQK5 DNA translocase FtsK
Rmet_1701	433.943	12.667	166.24	106.483	YP_583851.1	Q1LMP4 Secretion protein HlyD
Rmet_2027	59.6858	15.5407	NF/NF		YP_584175.1	Q1LLS0 Secretion protein HlyD
Rmet_5890	100.043	8.74095	37.2581	8.43757	YP_588018.1	Q1LAS7 Ferrous iron transport protein B
						Two-component system [PATH:ko02020]
Rmet_0464	115.288	97.8629	NF/NF		YP_582619.1	Q1LR76 Sensor protein
Rmet_0516	56.7189	24.4317	NF/NF		YP_582671.1	Q1LR24 Sensor protein
Rmet_1626	40.0707		NF/NF		YP_583778.1	Q1LMW7 Sensor protein
Rmet_1627	59.0377	27.2893	NF/NF		YP_583779.1	Q1LMW6 Two component transcriptional regulator, winged helix family
Rmet_1948	50.4576	19.0614	NF/NF		YP_584096.1	Q1LLZ9 Sensor protein
Rmet_2059	671.887	514.57	214.916	92.475	YP_584207.1	Q1LLN8 Nitrogen metabolism transcriptional regulator, NtrC, Fis family
Rmet_2060	71.4085	14.1276	NF/NF		YP_584208.1	Q1LLN7 Sensor protein
Rmet_2086	46.0627		NF/NF		YP_584234.1	Q1LLL1 Signal transduction histidine kinase, nitrate/nitrite-specific, NarQ
Rmet_2180	187.452	119.081	30.1098	4.02234	YP_584328.1	Q1LLB7 Two component transcriptional regulator, winged helix family
Rmet_3005	96.1152	14.8085	37.8322	6.30606	YP_585147.1	Q1LDD7 Sensor protein
Rmet_3477	14.9287		NF/NF		YP_585618.1	Q1LHM7 Two component transcriptional regulator, winged helix family
Rmet_3575	27.5238		NF/NF		YP_585716.1	Q1LHC9 Periplasmic sensor signal transduction histidine kinase
Rmet_3685	16.6649		NF/NF		YP_585826.1	Q1LH19 Flagellar transcriptional activator
Rmet_3689	81.0321	18.9846	NF/NF		YP_585830.1	Q1LH15 CheA signal transduction histidine kinases
Rmet_3693	47.2057	9.34138	NF/NF		YP_585834.1	Q1LH11 Chemotaxis response regulator protein-glutamate methylesterase 1
Rmet_3694	471.184	136.941	160.181	52.16	YP_585835.1	Q1LH10 Response regulator receiver domain protein (CheY-like)
Rmet_4230	18.1505		NF/NF		YP_586366.1	Q1LFI0 Two component transcriptional regulator, LuxR family
Rmet_4626	355.563		88.9155		YP_586757.1	Q1LED8 Sensor protein
Rmet_4830	111.279		NF/NF		YP_586961.1	Q1LDT4 Sensor protein
Rmet_4963	88.3189		NF/NF		YP_587094.1	Q1LDF1 Sensor protein
Rmet_5252	2178.6	1086.06	76.1542	2.64968	YP_587380.1	Q1LCL5 Flagellin-like protein
Rmet_5326	1015.1		431.183		YP_587454.1	Q1LCE1 Two component transcriptional regulator, winged helix family
Rmet_5331	288.554		NF/NF		YP_587459.1	Q1LCD6 Two component transcriptional regulator, winged helix family
Rmet_5332	17.0755		NF/NF		YP_587460.1	Q1LCD5 Sensor protein
Rmet_5392	27.0119		NF/NF		YP_587520.1	Q1LC75 Two component transcriptional regulator, winged helix family
Rmet_5797	485.804	166.865	128.992		YP_587925.1	Q1LB20 Sensor protein
Rmet_5940	370.356	338.247	NF/NF		YP_588068.1	Q1LAM7 Two component transcriptional regulator, LuxR family
						Bacterial chemotaxis [PATH:ko02030]
Rmet_3678	51.7517	14.1485	NF/NF		YP_585819.1	Q1LH26 Methyl-accepting chemotaxis sensory transducer
Rmet_3681	92.0919	10.4007	NF/NF		YP_585822.1	Q1LH23 CheW protein
Rmet_3682	96.1429	25.9453	NF/NF		YP_585823.1	Q1LH22 Methyl-accepting chemotaxis sensory transducer with Pas/Pac sensor
Rmet_3683	261.119	6.38544	44.006		YP_585824.1	Q1LH21 Methyl-accepting chemotaxis sensory transducer
Rmet_3690	92.6674		NF/NF		YP_585831.1	Q1LH14 CheW protein
Rmet_3692	40.8887		NF/NF		YP_585833.1	Q1LH12 Probable chemoreceptor glutamine deamidase cheD
Rmet_3723	73.5197	51.1594	7.79853		YP_585864.1	Q1LGY1 Methyl-accepting chemotaxis sensory transducer
Rmet_4185	25.3809	17.4474	NF/NF		YP_586321.1	Q1LFM4 Methyl-accepting chemotaxis sensory transducer
Rmet_4195	118.899	89.0498	52.6605		YP_586331.1	Q1LFL4 Methyl-accepting chemotaxis sensory transducer
Rmet_5250	72.4363		NF/NF		YP_587378.1	Q1LCL7 Methyl-accepting chemotaxis sensory transducer
Rmet_5612	96.5833	32.2593	10.8079		YP_587740.1	Q1LBK5 Methyl-accepting chemotaxis sensory transducer
Rmet_5641	259.851	79.4114	11.5008		YP_587769.1	Q1LBH6 Methyl-accepting chemotaxis sensory transducer
						Flagellar assembly [PATH:ko02040]
Rmet_3700	575.882		NF/NF		YP_585841.1	Q1LH04 GTP-binding signal recognition particle SRP54, G-domain
Rmet_3733	72.6472		NF/NF		YP_585874.1	Q1LGX1 Flageller protein FlgA
Rmet_3734	144.761		NF/NF		YP_585875.1	Q1LGX0 Flagellar basal-body rod protein FlgB
Rmet_3737	37.403	4.83507	NF/NF		YP_585878.1	Q1LGW7 Putative uncharacterized protein
Rmet_3742	102.863	86.5194	NF/NF		YP_585883.1	Q1LGW2 Mannosyl-glycoprotein endo-beta-N-acetylglucosamidase
Rmet_5256	23.9678	3.83241	NF/NF		YP_587384.1	Q1LCL1 Flagellar protein FliT
Rmet_5259	242.2	43.569	39.6822		YP_587387.1	Q1LCK8 Flagellar hook-basal body complex protein (FliE)
Rmet_5297	41.6071	16.5868	NF/NF		YP_587425.1	Q1LCH0 Flagellar basal body-associated protein FliL
						Endocrine System
Rmet_2875	83.2066	31.1251	NF/NF		YP_585017.1	Q1LJC8 Fatty acid desaturase
						Amyotrophic lateral sclerosis (ALS) [PATH:ko05030]
Rmet_2757	164.018	43.3592	97.8979	12.4134	YP_584899.1	Q1LJP6 Superoxide dismutase [Cu-Zn]
